# Supplementary material for: Extensive reference set and refined computational protocol for calculations of 57Fe Mössbauer parameters
Source: Royal Society of Chemistry journal article supplement (doi:10.1039/d4cp00431k), 2024-01-01
Supplement: d4cp00431k2.xlsx [file d4cp00431k2.xlsx]

## Sheet: B3LYP RHO(0)
				Fe	Exp.
# complex	Name	Charge	2S + 1	OS	IS (mm/s)		Non Relativistic	CP(PPP)	x2c-TZVPPall	x2c-TZVPPall-s	aVTZ-J	DKH-def2-TZVPP	ANO-RCC-TZ	s-dec. x2c-TZVPPall	s-dec. aVTZ-J	s-dec. aVTZ-J (-dfg)	aVTZ-Jmod
1	[Fe(CO)4H]-	-1	1	0	-0.17		11818	14365.9	13656.8	13657.2	10514.8	14080.1	15636.3	13692.2	14934.6	14934.6	14808.5
2	Fe(CO)5	0	1	0	-0.18		11817.8	14365.6	13656.3	13656.7	10514.6	14079.8	15636.1	13691.9	14934.2	14934.2	14808.2
3	[Fe(η4-butadiene)(CO)3]	0	1	0	0.12		11817.5	14365.2	13655.5	13655.9	10514.3	14079.4	15635.7	13691.5	14933.8	14933.8	14807.8
4	Fe(CO)3(cyclo-butadiene)	0	1	0	0.02		11817.5	14365.2	13655.5	13655.9	10514.3	14079.5	15635.7	13691.6	14933.9	14933.9	14807.8
5	MeLMe,MeFe(CNXyl)3	0	2	1	0.17		11817.2	14364.9	13654.9	13655.3	10514	14079.1	15632.9	13691.2	14933.5	14933.5	14807.4
6	LMeFe(η6-C6H6)	0	2	1	0.7		11816	14363	13652.3	13652.7	10512.6	14077.1	15632.2	13689.4	14931.5	14931.5	14805.4
7	MeLMe,MeFe(CO)3	0	2	1	0.12		11817.4	14364.9	13655.2	13655.6	10514.1	14079.1	15634.8	13691.2	14933.5	14933.5	14807.5
8	Fe(phen)2(NCS)2 (LS)	0	1	2	0.34		11816.7	14363.8	13653.7	13654.1	10513.2	14078	15633.6	13690.2	14932.4	14932.4	14806.3
9	Fe(LN4)(NCS)2 (LS)	0	1	2	0.44		11816.7	14363.8	13653.6	13654	10513.2	14078	15633.5	13690.1	14932.3	14932.3	14806.2
10	Fc D5d	0	1	2	0.53		11816.3	14363.3	13652.4	13652.8	10512.9	14077.5	15633.8	13689.8	14931.9	14931.9	14805.9
11	[Fe(pyS4)(PH3)]	0	1	2	0.34		11816.8	14364	13654.3	13654.7	10513.4	14078.2	15634.5	13690.4	14932.6	14932.5	14806.5
12	[Fe(pyS4)(CO)]	0	1	2	0.19		11817.1	14364.5	13654.7	13655.1	10513.7	14078.7	15634.8	13690.8	14933	14933	14807
13	CpFe(CO)2Cl	0	1	2	0.27		11817.1	14364.5	13654.6	13655	10513.8	14078.7	15635	13690.9	14933.1	14933.1	14807.1
14	[Fe(OEP)(CO)]	0	1	2	0.27		11817.1	14364.4	13654.5	13654.9	10513.7	14078.6	15634.6	13690.8	14933	14933	14807
15	[Fe(PyO)I(CO)2PPh3]	0	1	2	0.1		11817.4	14364.9	13655.1	13655.5	10514	14079.1	15634.6	13691.2	14933.5	14933.5	14807.4
16	[Fe(PyS)I(CO)2PPh3]	0	1	2	0.1		11817.4	14364.9	13655.1	13655.5	10514	14079	15634.6	13691.2	14933.4	14933.4	14807.4
17	CpFe(CO)2Me	0	1	2	0.08		11817.4	14365	13655	13655.3	10514.1	14079.1	15635.4	13691.3	14933.6	14933.6	14807.5
18	[{Fe–NO}6(pyS4)]+	1	1	2	0.04		11817.4	14365	13655.3	13655.7	10514.1	14079.2	15635.6	13691.4	14933.6	14933.6	14807.6
19	[CpFe(CO)3]+	1	1	2	0.05		11817.4	14364.9	13655.1	13655.5	10514.1	14079.1	15635.5	13691.3	14933.5	14933.5	14807.5
20	[Fe(bipy)3](ClO4)2	2	1	2	0.325		11816.6	14363.9	13653.6	13654	10513.3	14078.1	15633.3	13690.2	14932.4	14932.4	14806.4
21	[Fe(phen)3](ClO4)2	2	1	2	0.341		11816.6	14363.8	13653.5	13653.9	10513.2	14077.9	15633	13690.1	14932.3	14932.3	14806.3
22	{Fe[HC(3,5-Me2pz)3]2}I2 (LS)	0	1	2	0.46		11816.1	14363.6	13653.2	13653.6	10513	14077.7	15631.7	13689.9	14932.1	14932.1	14806
23	Fc(CO2H)2	0	1	2	0.48		11816.3	14363.4	13652.4	13652.8	10513	14077.6	15633.7	13689.8	14932	14932	14805.9
24	[Fe(pyS4)(SMe2)]	0	1	2	0.44		11816.7	14363.8	13654	13654.4	10513.2	14078	15634	13690.1	14932.3	14932.3	14806.3
25	PcFePy2	0	1	2	0.32		11816.7	14363.9	13653.6	13654	10513.3	14078.1	15633.2	13690.3	14932.5	14932.5	14806.4
26	[Fe(SC5H4N-CO)I(CO)2(ArNC)]	0	1	2	0.01		11817.6	14365.2	13655.6	13656	10514.3	14079.4	15635.2	13691.5	14933.8	14933.8	14807.8
27	[(TIMMN_Mes)Fe(NAd)]	0	1	2	-0.18		11818	14366.1	13656.4	13656.9	10514.9	14080.2	15632.8	13692.3	14934.7	14934.7	14808.6
28	FcC≡CH	0	1	2	0.52		11816.3	14363.4	13652.4	13652.7	10512.9	14077.5	15633.7	13689.8	14931.9	14931.9	14805.9
29	FcCN	0	1	2	0.52		11816.3	14363.4	13652.4	13652.7	10512.9	14077.5	15633.7	13689.8	14931.9	14931.9	14805.9
30	Fc(COMe)	0	1	2	0.54		11816.3	14363.4	13652.4	13652.8	10513	14077.6	15633.8	13689.8	14932	14931.9	14805.9
31	Fc(COMe)2	0	1	2	0.49		11816.3	14363.4	13652.4	13652.7	10513	14077.6	15633.7	13689.8	14932	14931.9	14805.9
32	Fc(CO2Me)	0	1	2	0.53		11816.3	14363.4	13652.4	13652.8	10513	14077.6	15633.8	13689.8	14932	14931.9	14805.9
33	Fc(CO2Me)2	0	1	2	0.54		11816.3	14363.4	13652.4	13652.7	10513	14077.6	15633.7	13689.8	14932	14932	14805.9
34	[{Fe-NO}7(pyS4)]	0	2	2	0.33		11816.9	14364.2	13654.4	13654.8	10513.5	14078.4	15634.9	13690.5	14932.7	14932.7	14806.7
35	[Fe(OEP)]	0	3	2	0.62		11816.6	14363.5	13653.2	13653.9	10513.1	14077.5	15634.2	13689.9	14931.8	14931.8	14805.8
36	[Fe(TPP)]	0	3	2	0.52		11816.4	14363.3	13653.2	13653.6	10512.9	14077.5	15634	13689.7	14931.8	14931.8	14805.8
37	Fe(phen)2(NCS)2 (HS)	0	5	2	1.01		11815.6	14362.1	13652	13652.5	10512	14076.3	15632.7	13688.5	14930.6	14930.5	14804.5
38	Fe(cis-phen)2Cl2	0	5	2	1.08		11815.6	14362.3	13652.3	13652.8	10512.1	14076.5	15633	13688.6	14930.7	14930.7	14804.7
39	[Fe(LN4)(NCS)2] (HS)	0	5	2	1.11		11815.5	14362	13651.9	13652.3	10511.9	14076.2	15632.3	13688.4	14930.5	14930.5	14804.5
40	[FeS4C8O4]2–	-2	5	2	0.668		11816.5	14363.1	13654	13654.4	10512.8	14077.4	15634.6	13689.5	14931.7	14931.7	14805.7
41	[Fe(SPh)4]2–	-2	5	2	0.66		11816.4	14363.1	13653.9	13654.3	10512.8	14077.4	15634.1	13689.5	14931.7	14931.7	14805.6
42	[Ba(18-crown-6)(H2O(OH)][Fe(NCS)4]	-2	5	2	0.97		11815.7	14362.2	13652.8	13653.2	10512.1	14076.5	15633.2	13688.6	14930.7	14930.7	14804.7
43	[Fe(SR)3]-; R=C6H2-2,4,6-tBu3	-1	5	2	0.56		11816.8	14363.8	13654.1	13654.5	10513.2	14078	15633.4	13690.1	14932.3	14932.3	14806.3
44	Na[Fe(CH3CO2)TPpivP]	-1	5	2	1.05		11815.6	14362.2	13652.3	13652.7	10512.1	14076.5	15632.5	13688.6	14930.7	14930.7	14804.7
45	MeLMe,Me2Fe	0	5	2	0.84		11815.9	14362.7	13652.7	13653.1	10512.4	14076.9	15631.1	13689.1	14931.2	14931.2	14805.2
46	[Fe(bipy)3](ClO4)3	3	2	3	0.067		11817.1	14364.6	13654.5	13654.9	10513.8	14078.8	15634.2	13690.9	14933.2	14933.2	14807.1
47	[Fe(phen)3](ClO4)3	3	2	3	0.1		11817.1	14364.5	13654.4	13654.8	10513.8	14078.7	15633.9	13690.8	14933.1	14933.1	14807.1
48	[Fe(terpy)2](ClO4)3	3	2	3	0.076		11817.2	14364.7	13654.6	13655	10513.9	14078.9	15634.2	13691	14933.3	14933.3	14807.3
49	[Fe-trans-(cyclam)(N3)2]PF6	1	2	3	0.286		11816.8	14364.1	13653.9	13654.3	10513.5	14078.3	15634.4	13690.5	14932.7	14932.7	14806.6
50	Fe(OEPPY)	1	2	3	0.26		11816.9	14364.3	13654.2	13654.6	10513.6	14078.5	15633.5	13690.6	14932.8	14932.8	14806.8
51	[Fe(acpa)2]PF6 (LS)	1	2	3	0.25		11817.1	14364.5	13654.5	13654.9	10513.7	14078.7	15634.6	13690.8	14933.1	14933.1	14807
52	Fe(thpu)(Hthpu) (LS)	0	2	3	0.28		11817.1	14364.5	13654.8	13655.2	10513.7	14078.7	15635.3	13690.8	14933.1	14933.1	14807
53	[(TIMMN_Mes)Fe(NAd)]+	1	2	3	-0.12		11817.7	14365.7	13656	13656.5	10514.6	14079.8	15632.5	13691.9	14934.3	14934.3	14808.2
54	[Cp*2Fe]+	1	2	3	0.57		11816.4	14363.5	13652.6	13652.9	10513	14077.7	15633.1	13689.9	14932	14932	14806
55	Fe(mnt)2(idzm)	0	4	3	0.36		11817.1	14364.2	13654.8	13655.2	10513.6	14078.5	15635.4	13690.6	14932.8	14932.8	14806.8
56	[Fe(η4-MAC*)Cl]2−	-2	4	3	0.25		11817.1	14364.4	13654.6	13655	10513.7	14078.6	15634.9	13690.7	14933	14933	14806.9
57	Fe(S-t-Bu)3NO	-1	4	3	0.26		11817.3	14364.4	13655.3	13655.7	10513.7	14078.7	15635.4	13690.7	14933	14933	14807
58	[Fe(SEt)4]−	-1	6	3	0.25		11817.3	14364.5	13655.5	13656	10513.8	14078.7	15635.8	13690.8	14933.1	14933.1	14807.1
59	Fe(NO)2(S(p-Me)Ph)2−	-1	6	3	0.18		11816.9	14364	13654.9	13655.3	10513.4	14078.3	15635.1	13690.3	14932.6	14932.6	14806.6
60	[Fe(C33H37N4)Cl]	0	6	3	0.39		11816.8	14363.9	13654.6	13655	10513.4	14078.2	15634.8	13690.2	14932.5	14932.5	14806.5
61	[Fe(porphyrin)(OCOCH3)]	0	6	3	0.4		11816.7	14363.7	13654.4	13654.8	10513.2	14078	15634.6	13690.1	14932.3	14932.3	14806.3
62	Fe(acac)3	0	6	3	0.53		11816.2	14363.1	13653.4	13653.8	10512.7	14077.3	15633.9	13689.4	14931.6	14931.6	14805.6
63	Fe(tfa)3	0	6	3	0.53		11816.2	14363.1	13653.3	13653.8	10512.7	14077.3	15633.9	13689.4	14931.6	14931.6	14805.6
64	[Fe(phen)2Cl2]+	1	6	3	0.39		11816.6	14363.6	13653.9	13654.4	10513.1	14077.8	15634.3	13689.9	14932.1	14932.1	14806.1
65	PcFeCl	0	6	3	0.28		11816.7	14363.9	13654.6	13655	10513.3	14078.2	15634.8	13690.2	14932.5	14932.5	14806.5
66	MeLMe,MeFeCl2	0	6	3	0.33		11817	14364.1	13654.8	13655.3	10513.5	14078.4	15634.9	13690.4	14932.7	14932.7	14806.7
67	[Cp*2Fe(CO)]2+	2	1	4	0.42		11816.6	14363.8	13653.1	13653.5	10513.3	14078	15633.1	13690.2	14932.4	14932.4	14806.3
68	[(TIMMN_Mes)Fe(NAd)]2+	2	1	4	-0.14		11818.1	14366.1	13656.4	13656.8	10514.9	14080.3	15632.9	13692.4	14934.8	14934.8	14808.7
69	[(N3N′)Fe(CN)]	0	1	4	-0.2		11818.2	14366.1	13656.4	13656.8	10514.9	14080.3	15634	13692.4	14934.8	14934.8	14808.7
70	Fe(PPh3)2(“S2”)2	0	3	4	0.16		11817.3	14364.8	13655.1	13655.5	10514	14079	15635.2	13691.1	14933.4	14933.4	14807.3
71	Fe(PPh3)(“S2”)2	0	3	4	0.12		11817.5	14364.9	13655.6	13656	10514.1	14079.2	15635.9	13691.2	14933.6	14933.6	14807.5
72	[Fe(N4Py)(O)](ClO4)2	2	3	4	-0.04		11817.6	14365.3	13655.3	13655.7	10514.3	14079.5	15635.2	13691.6	14933.9	14933.9	14807.9
73	[Fe(O)(TMC)(NCCH3)]2+	2	3	4	0.17		11817.2	14364.7	13654.6	13655.1	10513.9	14078.9	15634.1	13691.1	14933.3	14933.3	14807.3
74	[Cp*2Fe]2+ (linear)	2	3	4	0.59		11816.2	14363.3	13652.6	13653	10512.9	14077.5	15632.9	13689.7	14931.9	14931.8	14805.8
75	[Fe(O)(porphyrin)]+	1	4	4	0.08		11817.9	14365	13655.4	13655.8	10514.1	14079.3	15635.8	13691.3	14933.7	14933.6	14807.6
76	[Fe(η4-MAC*)Cl]−	-1	5	4	0.04		11817.7	14365.3	13655.7	13656.2	10514.4	14079.5	15635.6	13691.6	14934	14933.9	14807.9
77	[Fe(B*)(O)]-	-1	2	5	-0.42		11818.7	14366.9	13657.5	13657.9	10515.5	14081.1	15637.5	13693.1	14935.6	14935.6	14809.5
78	[Fe(cyclam-acetate)(N)]PF6	1	2	5	-0.02		11817.7	14365.4	13655.3	13655.7	10514.4	14079.5	15635.7	13691.6	14934	14934	14807.9
79	[Fe(Me3cyclam-acetate)(N)](PF6)2	2	1	6	-0.29		11818.3	14366.4	13656.5	13656.9	10515.1	14080.6	15636.3	13692.6	14935.1	14935.1	14809
80	[(TIMMN_Mes)Fe(N)(F)]3+	3	2	7	-0.72		11819.2	14367.4	13657.7	13658.1	10515.9	14081.6	15636.2	13693.6	14936.1	14936.1	14810.1

## Sheet: Other DFT RHO(0)
				Fe	Exp.		CP(PPP)														DKH-def2-TZVPP														s-dec. aVTZ-J
# complex	Name	Charge	2S + 1	OS	IS (mm/s)		VWN5	BP86	PBE	BLYP	TPSS	PBE0	B1LYP	TPSSh	TPSS0	M06	LC-BLYP	CAM-B3LYP	wB97X	B2PLYP	VWN5	BP86	PBE	BLYP	TPSS	PBE0	B1LYP	TPSSh	TPSS0	M06	LC-BLYP	CAM-B3LYP	wB97X	B2PLYP	VWN5	BP86	PBE	BLYP	TPSS	PBE0	B1LYP	TPPSh	TPSS0	M06	LC-BLYP	CAM-B3LYP	wB97X	B10LYP	B30LYP
1	[Fe(CO)4H]-	-1	1	0	-0.17		14276.1	14391.4	14375.3	14386.3	14362.3	14363.3	14371.6	14358.8	14353.6	14430.8	14383.5	14374.2	14454.6	14355.4	14013.5	14097.7	14090.2	14093	14082.1	14082.4	14084.7	14079.8	14076.4	14109.3	14090.7	14085.9	14091.9	14075.4	14834.6	14963.9	14937	14958.3	14920.9	14924.8	14940.8	14917.7	14912.8	15013.7	14955.1	14943.9	15038.8	14951.3	14937.3
2	Fe(CO)5	0	1	0	-0.18		14275.8	14391.1	14375	14386	14362	14362.9	14371.3	14358.5	14353.3	14430.5	14383.2	14373.8	14454.3	14354.9	14013.2	14097.4	14089.9	14092.7	14081.8	14082.1	14084.3	14079.5	14076.1	14109	14090.4	14085.6	14091.5	14075	14834.3	14963.6	14936.7	14957.9	14920.6	14924.4	14940.4	14917.4	14912.5	15013.3	14954.8	14943.6	15038.5	14950.9	14936.9
3	[Fe(η4-butadiene)(CO)3]	0	1	0	0.12		14275.4	14390.7	14374.6	14385.6	14361.6	14362.6	14370.9	14358.1	14352.9	14430.2	14382.9	14373.5	14454	14354.6	14012.8	14096.9	14089.5	14092.2	14081.4	14081.7	14083.9	14079.1	14075.7	14108.6	14090.1	14085.2	14091.2	14074.6	14833.8	14963.2	14936.2	14957.5	14920.2	14924	14940	14917	14912.1	15013	14954.5	14943.2	15038.2	14950.5	14936.5
4	Fe(CO)3(cyclo-butadiene)	0	1	0	0.02		14275.4	14390.7	14374.6	14385.6	14361.6	14362.6	14371	14358.2	14353	14430.2	14382.9	14373.6	14454	14354.7	14012.8	14097	14089.6	14092.3	14081.4	14081.8	14084	14079.2	14075.8	14108.7	14090.1	14085.3	14091.3	14074.7	14833.9	14963.2	14936.3	14957.5	14920.3	14924.1	14940.1	14917	14912.2	15013	14954.5	14943.3	15038.3	14950.6	14936.6
5	MeLMe,MeFe(CNXyl)3	0	2	1	0.17		14275.2	14390.5	14374.4	14385.4	14361.3	14362.2	14370.5	14357.8	14352.5	14429.8	14382.6	14373.2	14453.6	14354	14012.6	14096.7	14089.3	14092.1	14081.1	14081.3	14083.6	14078.8	14075.3	14108.3	14089.8	14084.9	14090.8	14074	14833.6	14963	14936	14957.3	14919.9	14923.6	14939.6	14916.6	14911.7	15012.6	14954.2	14942.8	15037.7	14950.2	14936.1
6	LMeFe(η6-C6H6)	0	2	1	0.7		14273.4	14388.6	14372.5	14383.5	14359.5	14360.3	14368.6	14356	14350.6	14428.1	14380.8	14371.3	14451.8	14352.1	14010.7	14094.8	14087.4	14090.1	14079.3	14079.4	14081.6	14076.9	14073.4	14106.5	14088	14083	14089	14072.1	14831.7	14961	14934	14955.3	14918	14921.6	14937.6	14914.7	14909.7	15010.8	14952.3	14940.9	15035.8	14948.3	14934.1
7	MeLMe,MeFe(CO)3	0	2	1	0.12		14275.2	14390.5	14374.4	14385.4	14361.3	14362.2	14370.6	14357.8	14352.5	14429.9	14382.7	14373.2	14453.6	14354	14012.6	14096.7	14089.3	14092.1	14081.2	14081.4	14083.6	14078.8	14075.3	14108.4	14089.9	14084.9	14090.9	14074.1	14833.6	14963	14936	14957.3	14920	14923.6	14939.7	14916.7	14911.7	15012.7	14954.3	14942.9	15037.8	14950.3	14936.1
8	Fe(phen)2(NCS)2 (LS)	0	1	2	0.34		14274.4	14389.6	14373.5	14384.5	14360.5	14361.1	14369.4	14356.9	14351.4	14428.8	14381.6	14372.1	14452.5	14352.7	14011.8	14095.9	14088.4	14091.2	14080.3	14080.2	14082.5	14077.9	14074.2	14107.3	14088.9	14083.8	14089.7	14072.7	14832.8	14962.1	14935.1	14956.4	14919.1	14922.5	14938.5	14915.7	14910.5	15011.6	14953.2	14941.7	15036.6	14949.2	14934.9
9	Fe(LN4)(NCS)2 (LS)	0	1	2	0.44		14274.3	14389.5	14373.4	14384.4	14360.4	14361	14369.4	14356.8	14351.4	14428.7	14381.6	14372	14452.4	14352.6	14011.7	14095.8	14088.3	14091.1	14080.2	14080.2	14082.4	14077.8	14074.2	14107.3	14088.8	14083.7	14089.7	14072.7	14832.6	14961.9	14935	14956.2	14918.9	14922.4	14938.4	14915.6	14910.5	15011.5	14953.1	14941.6	15036.5	14949.1	14934.8
10	Fc D5d	0	1	2	0.53		14273.6	14388.9	14372.8	14383.7	14359.9	14360.7	14369	14356.4	14351.1	14428.5	14381.2	14371.7	14452.3	14352.7	14011	14095.1	14087.7	14090.4	14079.7	14079.8	14082	14077.4	14073.9	14106.9	14088.4	14083.4	14089.5	14072.7	14832	14961.3	14934.4	14955.6	14918.4	14922.1	14938.1	14915.2	14910.3	15011.2	14952.7	14941.3	15036.4	14948.6	14934.6
11	[Fe(pyS4)(PH3)]	0	1	2	0.34		14274.4	14389.6	14373.5	14384.5	14360.5	14361.3	14369.7	14356.9	14351.6	14428.9	14381.8	14372.3	14452.8	14353.2	14011.8	14095.9	14088.4	14091.2	14080.3	14080.5	14082.7	14078	14074.4	14107.4	14089	14084	14090	14073.2	14832.7	14962.1	14935.1	14956.4	14919	14922.7	14938.7	14915.7	14910.8	15011.6	14953.3	14941.9	15036.9	14949.3	14935.2
12	[Fe(pyS4)(CO)]	0	1	2	0.19		14274.8	14390	14373.9	14384.9	14360.9	14361.8	14370.1	14357.4	14352.1	14429.4	14382.2	14372.8	14453.2	14353.6	14012.2	14096.3	14088.9	14091.6	14080.7	14080.9	14083.2	14078.4	14074.9	14107.9	14089.5	14084.5	14090.5	14073.7	14833.2	14962.5	14935.5	14956.8	14919.5	14923.2	14939.2	14916.2	14911.3	15012.1	14953.8	14942.4	15037.4	14949.8	14935.7
13	CpFe(CO)2Cl	0	1	2	0.27		14274.8	14390.1	14374	14384.9	14361	14361.9	14370.2	14357.5	14352.3	14429.5	14382.3	14372.9	14453.4	14353.8	14012.2	14096.3	14088.9	14091.6	14080.8	14081	14083.3	14078.5	14075.1	14108	14089.5	14084.6	14090.6	14073.9	14833.2	14962.5	14935.6	14956.9	14919.6	14923.3	14939.3	14916.3	14911.4	15012.3	14953.9	14942.6	15037.5	14949.8	14935.8
14	[Fe(OEP)(CO)]	0	1	2	0.27		14274.7	14389.9	14373.8	14384.9	14360.8	14361.7	14370.1	14357.3	14352	14429.3	14382.3	14372.8	14453.2	14353.5	14012.1	14096.2	14088.8	14091.6	14080.7	14080.8	14083.1	14078.4	14074.9	14107.9	14089.5	14084.5	14090.5	14073.6	14833.1	14962.4	14935.5	14956.8	14919.4	14923.1	14939.2	14916.2	14911.2	15012.1	14953.9	14942.4	15037.4	14949.7	14935.6
15	[Fe(PyO)I(CO)2PPh3]	0	1	2	0.1		14275.1	14390.4	14374.3	14385.3	14361.3	14362.2	14370.6	14357.8	14352.5	14429.8	14382.7	14373.2	14453.7	14354.1	14012.5	14096.7	14089.2	14092	14081.1	14081.3	14083.6	14078.8	14075.3	14108.3	14089.9	14084.9	14090.9	14074.1	14833.6	14962.9	14935.9	14957.2	14919.9	14923.6	14939.7	14916.6	14911.7	15012.6	14954.3	14942.9	15037.8	14950.2	14936.1
16	[Fe(PyS)I(CO)2PPh3]	0	1	2	0.1		14275.1	14390.4	14374.3	14385.3	14361.2	14362.2	14370.5	14357.8	14352.5	14429.8	14382.6	14373.2	14453.6	14354.1	14012.5	14096.6	14089.2	14092	14081.1	14081.3	14083.6	14078.8	14075.3	14108.3	14089.8	14084.9	14090.9	14074.1	14833.5	14962.9	14935.9	14957.2	14919.9	14923.6	14939.6	14916.6	14911.7	15012.6	14954.2	14942.8	15037.8	14950.2	14936.1
17	CpFe(CO)2Me	0	1	2	0.08		14275.2	14390.5	14374.4	14385.4	14361.4	14362.3	14370.7	14357.9	14352.7	14429.9	14382.7	14373.3	14453.8	14354.3	14012.6	14096.7	14089.3	14092	14081.2	14081.5	14083.7	14078.9	14075.5	14108.4	14089.9	14085	14091	14074.3	14833.6	14963	14936	14957.3	14920	14923.8	14939.8	14916.8	14911.9	15012.8	14954.3	14943	15038	14950.3	14936.3
18	[{Fe–NO}6(pyS4)]+	1	1	2	0.04		14275.2	14390.4	14374.3	14385.4	14361.3	14362.4	14370.8	14357.9	14352.7	14430	14382.9	14373.4	14453.9	14354.5	14012.6	14096.7	14089.2	14092	14081.1	14081.5	14083.8	14078.9	14075.5	14108.5	14090.1	14085.1	14091.1	14074.5	14833.6	14962.9	14936	14957.3	14919.9	14923.8	14939.9	14916.7	14911.9	15012.8	14954.5	14943.1	15038.1	14950.3	14936.4
19	[CpFe(CO)3]+	1	1	2	0.05		14275.2	14390.4	14374.4	14385.3	14361.4	14362.3	14370.6	14357.9	14352.7	14429.9	14382.6	14373.3	14453.8	14354.3	14012.6	14096.7	14089.3	14092	14081.2	14081.5	14083.6	14078.9	14075.5	14108.4	14089.9	14085	14091	14074.3	14833.6	14963	14936	14957.3	14920	14923.8	14939.7	14916.7	14911.9	15012.7	14954.3	14942.9	15037.9	14950.2	14936.2
20	[Fe(bipy)3](ClO4)2	2	1	2	0.325		14274.4	14389.6	14373.5	14384.5	14360.5	14361.1	14369.5	14356.9	14351.5	14428.8	14381.7	14372.1	14452.5	14352.8	14011.8	14095.9	14088.4	14091.2	14080.3	14080.3	14082.5	14077.9	14074.3	14107.3	14088.9	14083.8	14089.8	14072.8	14832.8	14962.1	14935.1	14956.4	14919.1	14922.5	14938.5	14915.7	14910.6	15011.6	14953.3	14941.8	15036.7	14949.2	14934.9
21	[Fe(phen)3](ClO4)2	2	1	2	0.341		14274.3	14389.5	14373.4	14384.4	14360.4	14361	14369.4	14356.8	14351.4	14428.7	14381.6	14372	14452.4	14352.7	14011.7	14095.8	14088.3	14091.1	14080.2	14080.2	14082.4	14077.8	14074.2	14107.2	14088.8	14083.7	14089.7	14072.7	14832.7	14962	14935	14956.3	14919	14922.4	14938.4	14915.6	14910.5	15011.4	14953.1	14941.6	15036.5	14949.1	14934.8
22	{Fe[HC(3,5-Me2pz)3]2}I2 (LS)	0	1	2	0.46		14274	14389.2	14373.1	14384.1	14360.1	14360.8	14369.2	14356.6	14351.2	14428.5	14381.4	14371.9	14452.3	14352.5	14011.3	14095.4	14088	14090.8	14079.9	14080	14082.2	14077.5	14074	14107	14088.6	14083.5	14089.5	14072.6	14832.3	14961.6	14934.6	14955.9	14918.6	14922.2	14938.2	14915.3	14910.3	15011.2	14952.9	14941.5	15036.4	14948.9	14934.6
23	Fc(CO2H)2	0	1	2	0.48		14273.7	14389	14372.9	14383.8	14359.9	14360.8	14369.1	14356.5	14351.2	14428.5	14381.2	14371.8	14452.4	14352.8	14011	14095.2	14087.8	14090.5	14079.7	14079.9	14082.1	14077.4	14074	14107	14088.4	14083.5	14089.6	14072.8	14832	14961.4	14934.5	14955.7	14918.5	14922.2	14938.1	14915.2	14910.3	15011.3	14952.8	14941.4	15036.5	14948.7	14934.6
24	[Fe(pyS4)(SMe2)]	0	1	2	0.44		14274.2	14389.4	14373.3	14384.3	14360.3	14361.1	14369.4	14356.7	14351.4	14428.7	14381.6	14372.1	14452.5	14352.9	14011.6	14095.7	14088.2	14091	14080.1	14080.2	14082.5	14077.7	14074.2	14107.2	14088.8	14083.8	14089.8	14072.9	14832.5	14961.8	14934.9	14956.2	14918.8	14922.4	14938.5	14915.5	14910.5	15011.4	14953.1	14941.7	15036.6	14949.1	14934.9
25	PcFePy2	0	1	2	0.32		14274.4	14389.6	14373.5	14384.5	14360.5	14361.2	14369.6	14357	14351.6	14428.9	14381.8	14372.2	14452.6	14352.8	14011.8	14095.9	14088.4	14091.2	14080.3	14080.3	14082.6	14078	14074.3	14107.4	14089	14083.9	14089.9	14072.8	14832.8	14962.1	14935.1	14956.4	14919.1	14922.6	14938.6	14915.8	14910.7	15011.7	14953.4	14941.9	15036.8	14949.3	14935
26	[Fe(SC5H4N-CO)I(CO)2(ArNC)]	0	1	2	0.01		14275.5	14390.7	14374.6	14385.6	14361.6	14362.5	14370.9	14358.1	14352.9	14430.1	14382.9	14373.5	14454	14354.4	14012.9	14097	14089.6	14092.3	14081.4	14081.7	14083.9	14079.1	14075.7	14108.6	14090.2	14085.2	14091.2	14074.5	14833.9	14963.2	14936.3	14957.6	14920.2	14924	14940	14917	14912.1	15012.9	14954.5	14943.2	15038.2	14950.6	14936.5
27	[(TIMMN_Mes)Fe(NAd)]	0	1	2	-0.18		14276.3	14391.5	14375.4	14386.4	14362.4	14363.3	14371.8	14358.9	14353.7	14431	14383.8	14374.4	14454.8	14355.3	14013.7	14097.8	14090.3	14093.1	14082.2	14082.5	14084.8	14079.9	14076.5	14109.5	14091	14086.1	14092.1	14075.4	14834.7	14964	14937.1	14958.4	14921	14924.8	14940.9	14917.8	14912.9	15013.8	14955.5	14944.1	15039.1	14951.4	14937.4
28	FcC≡CH	0	1	2	0.52		14273.6	14388.9	14372.8	14383.8	14359.9	14360.7	14369.1	14356.4	14351.2	14428.5	14381.2	14371.7	14452.3	14352.7	14011	14095.1	14087.7	14090.4	14079.7	14079.9	14082.1	14077.4	14073.9	14106.9	14088.4	14083.4	14089.5	14072.7	14832	14961.3	14934.4	14955.6	14918.4	14922.1	14938.1	14915.2	14910.3	15011.2	14952.7	14941.4	15036.4	14948.6	14934.6
29	FcCN	0	1	2	0.52		14273.6	14388.9	14372.8	14383.8	14359.9	14360.7	14369.1	14356.4	14351.2	14428.5	14381.2	14371.7	14452.3	14352.7	14011	14095.1	14087.7	14090.4	14079.7	14079.9	14082.1	14077.4	14073.9	14106.9	14088.4	14083.4	14089.5	14072.7	14832	14961.3	14934.4	14955.6	14918.5	14922.1	14938.1	14915.2	14910.3	15011.2	14952.7	14941.4	15036.4	14948.6	14934.6
30	Fc(COMe)	0	1	2	0.54		14273.7	14388.9	14372.9	14383.8	14359.9	14360.8	14369.1	14356.4	14351.2	14428.5	14381.2	14371.8	14452.3	14352.8	14011	14095.2	14087.8	14090.5	14079.7	14079.9	14082.1	14077.4	14074	14107	14088.4	14083.5	14089.6	14072.8	14832	14961.4	14934.4	14955.7	14918.5	14922.2	14938.1	14915.2	14910.3	15011.3	14952.8	14941.4	15036.5	14948.7	14934.6
31	Fc(COMe)2	0	1	2	0.49		14273.7	14389	14372.9	14383.8	14359.9	14360.8	14369.1	14356.5	14351.2	14428.5	14381.2	14371.8	14452.3	14352.7	14011	14095.2	14087.8	14090.5	14079.7	14079.9	14082.1	14077.4	14074	14107	14088.4	14083.5	14089.6	14072.8	14832	14961.4	14934.4	14955.7	14918.5	14922.2	14938.1	14915.2	14910.3	15011.3	14952.8	14941.4	15036.5	14948.7	14934.6
32	Fc(CO2Me)	0	1	2	0.53		14273.7	14388.9	14372.9	14383.8	14359.9	14360.8	14369.1	14356.4	14351.2	14428.5	14381.2	14371.8	14452.4	14352.8	14011	14095.2	14087.8	14090.5	14079.7	14079.9	14082.1	14077.4	14074	14107	14088.4	14083.5	14089.6	14072.8	14832	14961.4	14934.4	14955.7	14918.5	14922.2	14938.1	14915.2	14910.3	15011.3	14952.8	14941.4	15036.5	14948.7	14934.6
33	Fc(CO2Me)2	0	1	2	0.54		14273.7	14389	14372.9	14383.8	14359.9	14360.8	14369.1	14356.5	14351.2	14428.5	14381.2	14371.8	14452.4	14352.8	14011	14095.2	14087.8	14090.5	14079.7	14079.9	14082.1	14077.4	14074	14107	14088.4	14083.5	14089.6	14072.8	14832	14961.4	14934.5	14955.7	14918.5	14922.2	14938.2	14915.2	14910.3	15011.3	14952.8	14941.4	15036.5	14948.7	14934.6
34	[{Fe-NO}7(pyS4)]	0	2	2	0.33		14274.4	14389.7	14373.6	14384.6	14360.6	14361.5	14369.9	14357.1	14351.8	14429.1	14382	14372.5	14452.9	14353.3	14011.8	14096	14088.5	14091.3	14080.4	14080.6	14082.9	14078.1	14074.6	14107.6	14089.2	14084.2	14090.2	14073.3	14832.8	14962.1	14935.2	14956.5	14919.1	14922.9	14938.9	14915.9	14910.9	15011.9	14953.6	14942.2	15037.1	14949.5	14935.4
35	[Fe(OEP)]	0	3	2	0.62		14273.8	14389.1	14372.9	14384.2	14359.8	14360.4	14368.9	14356.2	14350.7	14428.4	14381.2	14371.6	14452	14352.2	14011.2	14095.3	14087.8	14090.9	14079.7	14079.9	14082	14077.3	14073.9	14107	14088.8	14083.7	14089.6	14072.3	14832.1	14961.4	14934.4	14956.1	14918.4	14922.1	14938.2	14915	14909.9	15011.2	14952.8	14941.2	15036.1	14948.7	14934.7
36	[Fe(TPP)]	0	3	2	0.52		14273.7	14389	14372.8	14383.9	14359.8	14360.4	14368.9	14356.2	14350.8	14428.3	14381.2	14371.6	14452	14352.2	14011.2	14095.3	14087.8	14090.7	14079.7	14079.6	14082	14077.3	14073.6	14106.9	14088.5	14083.4	14089.3	14072.3	14832.1	14961.4	14934.5	14955.8	14918.4	14921.8	14937.9	14915	14909.9	15011.2	14952.8	14941.2	15036.2	14948.7	14934.4
37	Fe(phen)2(NCS)2 (HS)	0	5	2	1.01		14272.9	14388	14371.9	14382.9	14358.8	14359.2	14367.7	14355.2	14349.5	14427.5	14380	14370.3	14450.6	14350.7	14010.3	14094.3	14086.8	14089.6	14078.7	14078.4	14080.7	14076.2	14072.3	14106	14087.2	14082	14087.8	14070.7	14831.2	14960.4	14933.4	14954.7	14917.3	14920.5	14936.6	14913.8	14908.5	15010.1	14951.4	14939.8	15034.6	14947.5	14933
38	Fe(cis-phen)2Cl2	0	5	2	1.08		14273	14388.2	14372	14383.1	14359	14359.4	14367.8	14355.3	14349.6	14427.7	14380	14370.3	14450.6	14350.8	14010.4	14094.5	14087	14089.8	14078.8	14078.6	14080.8	14076.3	14072.5	14106.2	14087.2	14082.1	14087.9	14070.8	14831.3	14960.5	14933.5	14954.9	14917.5	14920.7	14936.7	14914	14908.7	15010.4	14951.5	14939.9	15034.7	14947.7	14933.1
39	[Fe(LN4)(NCS)2] (HS)	0	5	2	1.11		14272.9	14388	14371.9	14382.9	14358.8	14359.2	14367.6	14355.1	14349.5	14427.4	14379.9	14370.2	14450.6	14350.7	14010.3	14094.3	14086.8	14089.6	14078.6	14078.3	14080.6	14076.1	14072.3	14105.9	14087.1	14081.9	14087.8	14070.7	14831.2	14960.4	14933.4	14954.7	14917.3	14920.5	14936.5	14913.8	14908.5	15010.1	14951.4	14939.8	15034.6	14947.5	14932.9
40	[FeS4C8O4]2–	-2	5	2	0.668		14273.5	14388.7	14372.6	14383.7	14359.5	14360.3	14368.8	14356	14350.6	14428.3	14381	14371.4	14451.8	14352	14011	14095.1	14087.6	14090.4	14079.5	14079.5	14081.9	14077.1	14073.5	14106.9	14088.3	14083.2	14089.1	14072.1	14831.9	14961.2	14934.2	14955.6	14918.1	14921.7	14937.8	14914.8	14909.7	15011.1	14952.6	14941.1	15035.9	14948.5	14934.3
41	[Fe(SPh)4]2–	-2	5	2	0.66		14273.5	14388.7	14372.6	14383.6	14359.5	14360.3	14368.8	14356	14350.6	14428.3	14381	14371.4	14451.8	14352.1	14011	14095.1	14087.6	14090.4	14079.4	14079.5	14081.9	14077.1	14073.5	14106.8	14088.3	14083.2	14089.1	14072.2	14831.8	14961.2	14934.2	14955.5	14918.1	14921.7	14937.8	14914.8	14909.7	15011	14952.6	14941.1	15035.9	14948.5	14934.2
42	[Ba(18-crown-6)(H2O(OH)][Fe(NCS)4]	-2	5	2	0.97		14272.8	14388	14371.9	14382.9	14358.8	14359.4	14367.8	14355.2	14349.7	14427.6	14380.3	14370.6	14451	14351	14010.3	14094.3	14086.9	14089.7	14078.7	14078.6	14080.9	14076.3	14072.6	14106.1	14087.6	14082.4	14088.3	14071.1	14831.2	14960.4	14933.4	14954.8	14917.4	14920.7	14936.8	14914	14908.8	15010.2	14951.8	14940.2	15035	14947.6	14933.2
43	[Fe(SR)3]-; R=C6H2-2,4,6-tBu3	-1	5	2	0.56		14274	14389.3	14373.1	14384.3	14360.1	14360.9	14369.5	14356.6	14351.3	14428.9	14381.8	14372.2	14452.6	14352.8	14011.5	14095.6	14088.1	14091	14080	14080.1	14082.5	14077.6	14074.1	14107.4	14089	14083.9	14089.8	14072.8	14832.4	14961.7	14934.7	14956.1	14918.7	14922.3	14938.5	14915.4	14910.4	15011.7	14953.3	14941.8	15036.7	14949.1	14934.9
44	Na[Fe(CH3CO2)TPpivP]	-1	5	2	1.05		14273.1	14388.3	14372.1	14383.2	14359.1	14359.3	14367.8	14355.4	14349.6	14427.8	14380.1	14370.4	14450.8	14350.9	14010.5	14094.6	14087.1	14089.9	14078.9	14078.5	14080.8	14076.4	14072.4	14106.4	14087.4	14082.2	14088	14070.9	14831.4	14960.7	14933.7	14955	14917.6	14920.6	14936.7	14914.1	14908.7	15010.6	14951.6	14940	15034.8	14947.8	14933.1
45	MeLMe,Me2Fe	0	5	2	0.84		14273.2	14388.4	14372.3	14383.4	14359.3	14359.8	14368.3	14355.6	14350.2	14427.9	14380.7	14371	14451.4	14351.5	14010.6	14094.7	14087.2	14090	14079.1	14079	14081.3	14076.7	14073	14106.4	14087.9	14082.7	14088.6	14071.6	14831.6	14960.8	14933.8	14955.2	14917.8	14921.2	14937.3	14914.4	14909.2	15010.7	14952.2	14940.6	15035.5	14948	14933.7
46	[Fe(bipy)3](ClO4)3	3	2	3	0.067		14274.8	14390	14373.9	14384.9	14361	14361.9	14370.3	14357.5	14352.3	14429.6	14382.6	14373.1	14453.6	14354.2	14012.2	14096.3	14088.8	14091.6	14080.8	14081.1	14083.3	14078.5	14075.1	14108.1	14089.8	14084.8	14090.8	14074.2	14833.2	14962.5	14935.5	14956.8	14919.6	14923.3	14939.4	14916.3	14911.5	15012.4	14954.2	14942.7	15037.7	14949.9	14935.9
47	[Fe(phen)3](ClO4)3	3	2	3	0.1		14274.7	14389.9	14373.8	14384.9	14360.9	14361.8	14370.3	14357.4	14352.3	14429.5	14382.5	14373	14453.5	14354.1	14012.1	14096.2	14088.7	14091.5	14080.7	14081	14083.3	14078.4	14075.1	14108	14089.7	14084.7	14090.7	14074.1	14833.1	14962.4	14935.4	14956.7	14919.5	14923.2	14939.3	14916.2	14911.4	15012.3	14954.1	14942.7	15037.6	14949.8	14935.8
48	[Fe(terpy)2](ClO4)3	3	2	3	0.076		14274.9	14390.1	14374	14385.1	14361.1	14362	14370.5	14357.6	14352.5	14429.7	14382.7	14373.2	14453.7	14354.3	14012.3	14096.4	14088.9	14091.7	14080.9	14081.2	14083.5	14078.6	14075.3	14108.2	14089.9	14084.9	14090.9	14074.3	14833.3	14962.6	14935.6	14957	14919.7	14923.5	14939.5	14916.5	14911.6	15012.5	14954.3	14942.9	15037.8	14950	14936
49	[Fe-trans-(cyclam)(N3)2]PF6	1	2	3	0.286		14274.2	14389.4	14373.3	14384.3	14360.4	14361.4	14369.9	14357	14351.9	14429.1	14382.1	14372.6	14453.1	14353.8	14011.6	14095.7	14088.2	14091	14080.2	14080.6	14082.9	14078	14074.7	14107.6	14089.3	14084.3	14090.4	14073.8	14832.5	14961.9	14934.9	14956.2	14918.9	14922.8	14938.9	14915.8	14911	15011.9	14953.7	14942.3	15037.3	14949.3	14935.5
50	Fe(OEPPY)	1	2	3	0.26		14274.4	14389.7	14373.5	14384.6	14360.6	14361.6	14370	14357.2	14352	14429.3	14382.3	14372.8	14453.3	14353.9	14011.8	14095.9	14088.4	14091.2	14080.4	14080.7	14083	14078.2	14074.8	14107.8	14089.5	14084.5	14090.5	14073.9	14832.8	14962.1	14935.1	14956.5	14919.2	14923	14939.1	14916	14911.2	15012.1	14953.8	14942.4	15037.4	14949.5	14935.6
51	[Fe(acpa)2]PF6 (LS)	1	2	3	0.25		14274.6	14389.9	14373.8	14384.8	14360.8	14361.8	14370.2	14357.4	14352.2	14429.5	14382.4	14373	14453.4	14354.1	14012	14096.1	14088.7	14091.5	14080.6	14081	14083.3	14078.4	14075.1	14108	14089.7	14084.7	14090.7	14074.1	14833	14962.3	14935.4	14956.7	14919.4	14923.2	14939.3	14916.2	14911.4	15012.3	14954	14942.6	15037.6	14949.7	14935.8
52	Fe(thpu)(Hthpu) (LS)	0	2	3	0.28		14274.6	14389.9	14373.8	14384.8	14360.8	14361.8	14370.2	14357.4	14352.2	14429.4	14382.4	14372.9	14453.4	14354.1	14012.1	14096.2	14088.7	14091.5	14080.7	14081	14083.3	14078.4	14075	14108	14089.7	14084.7	14090.7	14074.1	14833	14962.4	14935.4	14956.7	14919.4	14923.2	14939.3	14916.2	14911.4	15012.3	14954	14942.6	15037.6	14949.7	14935.8
53	[(TIMMN_Mes)Fe(NAd)]+	1	2	3	-0.12		14275.9	14391.2	14375	14386.1	14362	14362.9	14371.3	14358.5	14353.2	14430.6	14383.5	14374	14454.4	14354.5	14013.3	14097.4	14090	14092.8	14081.8	14082	14084.3	14079.5	14076	14109.1	14090.7	14085.7	14091.7	14074.6	14834.4	14963.7	14936.7	14958	14920.7	14924.3	14940.4	14917.4	14912.3	15013.4	14955.1	14943.7	15038.6	14951	14936.8
54	[Cp*2Fe]+	1	2	3	0.57		14273.8	14389	14372.9	14383.9	14360	14360.8	14369.2	14356.5	14351.3	14428.4	14381.4	14371.9	14452.5	14352.9	14011.1	14095.2	14087.8	14090.6	14079.8	14079.9	14082.2	14077.5	14074	14106.8	14088.6	14083.6	14089.7	14072.9	14832.1	14961.4	14934.5	14955.8	14918.6	14922.2	14938.2	14915.3	14910.4	15011.1	14953	14941.5	15036.6	14948.7	14934.7
55	Fe(mnt)2(idzm)	0	4	3	0.36		14274.4	14389.6	14373.5	14384.6	14360.5	14361.5	14370	14357.1	14351.9	14429.3	14382.1	14372.7	14453.1	14353.7	14011.8	14096	14088.5	14091.3	14080.4	14080.7	14083	14078.1	14074.7	14107.8	14089.4	14084.4	14090.4	14073.7	14832.8	14962.1	14935.1	14956.5	14919.1	14923	14939	14915.9	14911.1	15012.1	14953.7	14942.4	15037.3	14949.5	14935.6
56	[Fe(η4-MAC*)Cl]2−	-2	4	3	0.25		14274.4	14389.7	14373.6	14384.6	14360.6	14361.7	14370.1	14357.2	14352.1	14429.5	14382.4	14372.9	14453.3	14353.9	14011.9	14096	14088.5	14091.4	14080.5	14080.9	14083.2	14078.3	14074.9	14108	14089.7	14084.7	14090.6	14074	14832.9	14962.2	14935.2	14956.6	14919.2	14923.1	14939.2	14916.1	14911.3	15012.3	14954	14942.6	15037.5	14949.6	14935.8
57	Fe(S-t-Bu)3NO	-1	4	3	0.26		14274.5	14389.7	14373.6	14384.7	14360.6	14361.7	14370.2	14357.2	14352.1	14429.6	14382.3	14372.9	14453.3	14354.1	14011.9	14096	14088.6	14091.4	14080.5	14080.9	14083.2	14078.2	14074.9	14108.1	14089.6	14084.7	14090.6	14074.2	14832.9	14962.2	14935.2	14956.6	14919.2	14923.2	14939.3	14916	14911.3	15012.4	14954	14942.6	15037.5	14949.6	14935.8
58	[Fe(SEt)4]−	-1	6	3	0.25		14274.4	14389.7	14373.6	14384.6	14360.6	14361.8	14370.2	14357.2	14352.2	14429.7	14382.4	14373	14453.4	14354.3	14011.9	14096.1	14088.6	14091.4	14080.5	14081	14083.3	14078.3	14075	14108.3	14089.7	14084.8	14090.7	14074.4	14832.9	14962.2	14935.2	14956.6	14919.2	14923.3	14939.4	14916.1	14911.4	15012.5	14954.1	14942.7	15037.6	14949.7	14935.9
59	Fe(NO)2(S(p-Me)Ph)2−	-1	6	3	0.18		14274.1	14389.4	14373.2	14384.3	14360.2	14361.5	14369.9	14356.8	14351.9	14429.3	14381.9	14372.7	14453.1	14353.9	14011.6	14095.7	14088.2	14091	14080.1	14080.7	14083	14077.8	14074.8	14107.9	14089.2	14084.5	14090.4	14074	14832.5	14961.8	14934.8	14956.2	14918.8	14923	14939	14915.6	14911.1	15012.2	14953.5	14942.4	15037.3	14949.2	14935.6
60	[Fe(C33H37N4)Cl]	0	6	3	0.39		14274	14389.3	14373.1	14384.2	14360.2	14361.2	14369.6	14356.8	14351.6	14429.2	14381.9	14372.4	14452.8	14353.5	14011.5	14095.6	14088.1	14090.9	14080.1	14080.5	14082.7	14077.9	14074.5	14107.8	14089.2	14084.2	14090.1	14073.6	14832.4	14961.8	14934.8	14956.1	14918.8	14922.7	14938.8	14915.6	14910.8	15012	14953.6	14942.2	15037	14949.2	14935.3
61	[Fe(porphyrin)(OCOCH3)]	0	6	3	0.4		14273.8	14389.1	14372.9	14384	14360	14361	14369.5	14356.6	14351.4	14429.1	14381.8	14372.3	14452.6	14353.3	14011.3	14095.4	14087.9	14090.8	14079.9	14080.2	14082.6	14077.7	14074.3	14107.6	14089	14084	14089.9	14073.4	14832.2	14961.6	14934.6	14955.9	14918.6	14922.5	14938.6	14915.4	14910.6	15011.9	14953.4	14941.9	15036.8	14949	14935.1
62	Fe(acac)3	0	6	3	0.53		14273.1	14388.4	14372.2	14383.3	14359.3	14360.4	14368.8	14356	14350.8	14428.4	14381.2	14371.6	14452	14352.7	14010.6	14094.7	14087.2	14090	14079.2	14079.6	14081.9	14077	14073.7	14106.9	14088.4	14083.4	14089.3	14072.7	14831.5	14960.8	14933.8	14955.1	14917.9	14921.8	14937.9	14914.7	14909.9	15011.2	14952.7	14941.3	15036.1	14948.2	14934.4
63	Fe(tfa)3	0	6	3	0.53		14273.1	14388.4	14372.2	14383.3	14359.3	14360.4	14368.8	14355.9	14350.8	14428.4	14381.1	14371.6	14452	14352.6	14010.5	14094.7	14087.1	14090	14079.2	14079.5	14081.9	14077	14073.6	14106.9	14088.4	14083.4	14089.3	14072.7	14831.4	14960.8	14933.7	14955.1	14917.8	14921.7	14937.8	14914.7	14909.9	15011.1	14952.7	14941.2	15036.1	14948.2	14934.4
64	[Fe(phen)2Cl2]+	1	6	3	0.39		14273.6	14388.9	14372.8	14383.8	14359.8	14360.9	14369.3	14356.4	14351.3	14428.9	14381.6	14372.1	14452.5	14353.2	14011.1	14095.2	14087.7	14090.5	14079.6	14080.1	14082.4	14077.4	14074.1	14107.4	14088.8	14083.8	14089.7	14073.2	14832	14961.3	14934.3	14955.7	14918.4	14922.3	14938.4	14915.2	14910.4	15011.7	14953.1	14941.7	15036.6	14948.7	14934.9
65	PcFeCl	0	6	3	0.28		14273.9	14389.2	14373.1	14384.1	14360.1	14361.2	14369.6	14356.7	14351.6	14429.2	14381.8	14372.4	14452.7	14353.4	14011.4	14095.6	14088.1	14090.9	14080	14080.4	14082.7	14077.8	14074.5	14107.7	14089.1	14084.2	14090	14073.5	14832.4	14961.7	14934.7	14956.1	14918.8	14922.6	14938.7	14915.6	14910.8	15012	14953.4	14942.1	15037	14949.1	14935.3
66	MeLMe,MeFeCl2	0	6	3	0.33		14274.1	14389.4	14373.2	14384.3	14360.3	14361.4	14369.8	14356.9	14351.8	14429.4	14382.1	14372.6	14453	14353.8	14011.6	14095.7	14088.2	14091	14080.1	14080.6	14082.9	14078	14074.7	14107.9	14089.4	14084.4	14090.3	14073.9	14832.5	14961.9	14934.9	14956.2	14918.9	14922.9	14939	14915.7	14911	15012.2	14953.7	14942.4	15037.3	14949.3	14935.5
67	[Cp*2Fe(CO)]2+	2	1	4	0.42		14274	14389.3	14373.2	14384.1	14360.2	14361.2	14369.6	14356.8	14351.6	14429	14381.6	14372.2	14452.8	14353.4	14011.3	14095.5	14088	14090.8	14080	14080.3	14082.5	14077.7	14074.4	14107.4	14088.8	14083.9	14090	14073.4	14832.3	14961.7	14934.7	14956	14918.8	14922.6	14938.6	14915.6	14910.7	15011.7	14953.2	14941.9	15036.9	14949	14935.1
68	[(TIMMN_Mes)Fe(NAd)]2+	2	1	4	-0.14		14276.2	14391.5	14375.4	14386.4	14362.4	14363.4	14371.9	14358.9	14353.8	14431.1	14384	14374.6	14455.1	14355.8	14013.6	14097.7	14090.3	14093.1	14082.2	14082.6	14084.9	14079.9	14076.6	14109.5	14091.2	14086.3	14092.3	14075.8	14834.7	14964	14937	14958.4	14921	14924.9	14941	14917.8	14913	15013.9	14955.6	14944.3	15039.3	14951.4	14937.5
69	[(N3N′)Fe(CN)]	0	1	4	-0.2		14276	14391.3	14375.2	14386.2	14362.2	14363.5	14371.9	14358.9	14353.9	14431.1	14384.1	14374.7	14455.2	14356.1	14013.4	14097.6	14090.1	14092.9	14082	14082.6	14084.9	14079.9	14076.7	14109.6	14091.3	14086.4	14092.5	14076.1	14834.5	14963.8	14936.8	14958.2	14920.9	14925	14941	14917.8	14913.1	15014	14955.8	14944.4	15039.5	14951.3	14937.6
70	Fe(PPh3)2(“S2”)2	0	3	4	0.16		14274.7	14390	14373.9	14384.9	14360.9	14362.1	14370.6	14357.6	14352.5	14429.8	14382.6	14373.3	14453.8	14354	14012.1	14096.3	14088.8	14091.6	14080.7	14081.3	14083.6	14078.6	14075.3	14108.2	14089.8	14085	14091	14074	14833.1	14962.5	14935.5	14956.8	14919.5	14923.6	14939.6	14916.4	14911.7	15012.5	14954.2	14943	15038	14950	14936.2
71	Fe(PPh3)(“S2”)2	0	3	4	0.12		14275	14390.3	14374.1	14385.2	14361.1	14362.3	14370.7	14357.8	14352.7	14429.9	14382.9	14373.5	14454	14354.5	14012.4	14096.6	14089.1	14091.9	14081	14081.5	14083.8	14078.8	14075.5	14108.4	14090.1	14085.2	14091.2	14074.5	14833.4	14962.8	14935.8	14957.1	14919.8	14923.7	14939.8	14916.6	14911.8	15012.7	14954.5	14943.2	15038.2	14950.2	14936.4
72	[Fe(N4Py)(O)](ClO4)2	2	3	4	-0.04		14275.4	14390.6	14374.5	14385.5	14361.5	14362.6	14371	14358.1	14352.6	14430.3	14383.2	14373.8	14454.2	14354.3	14012.8	14096.9	14089.4	14092.2	14081.3	14081.8	14084.1	14079.1	14075.8	14108.8	14090.4	14085.5	14091.5	14074.3	14833.8	14963.1	14936.1	14957.4	14920.2	14924.1	14940.1	14917	14912.2	15013.2	14954.8	14943.5	15038.4	14950.5	14936.7
73	[Fe(O)(TMC)(NCCH3)]2+	2	3	4	0.17		14274.8	14390	14373.9	14384.9	14361	14361.9	14370.3	14357.6	14352.2	14429.7	14382.7	14373	14453.7	14353.8	14012.1	14096.3	14088.8	14091.6	14080.8	14081	14083.3	14078.6	14075	14108.3	14089.9	14084.7	14090.9	14073.8	14833.2	14962.5	14935.5	14956.8	14919.5	14923.5	14939.4	14916.4	14911.4	15012.5	14954.2	14942.7	15037.9	14949.9	14935.8
74	[Cp*2Fe]2+ (linear)	2	3	4	0.59		14273.5	14388.8	14372.7	14383.7	14359.8	14360.6	14369	14356.3	14351.1	14428.5	14381.3	14371.8	14452.4	14352.6	14010.9	14095	14087.6	14090.4	14079.6	14079.8	14082	14077.3	14073.8	14106.9	14088.5	14083.5	14089.6	14072.6	14831.8	14961.2	14934.3	14955.6	14918.3	14922	14938	14915.1	14910.2	15011.2	14952.9	14941.4	15036.5	14948.6	14934.5
75	[Fe(O)(porphyrin)]+	1	4	4	0.08		14275.2	14390.4	14374.3	14385.3	14361.2	14362.3	14370.8	14357.8	14352.7	14430.1	14382.9	14373.5	14453.9	14354.4	14012.7	14096.7	14089.3	14092.1	14081.1	14081.5	14083.8	14078.9	14075.6	14108.6	14090.2	14085.3	14091.2	14074.5	14833.7	14962.9	14936	14957.3	14919.9	14923.8	14939.9	14916.7	14911.9	15012.9	14954.5	14943.2	15038.2	14950.3	14936.5
76	[Fe(η4-MAC*)Cl]−	-1	5	4	0.04		14275.1	14390.4	14374.2	14385.3	14361.3	14362.6	14371.1	14358	14353	14430.5	14383.4	14373.9	14454.4	14355.1	14012.6	14096.7	14089.2	14092	14081.2	14081.8	14084.1	14079.1	14075.9	14109	14090.6	14085.7	14091.7	14075.2	14833.6	14962.9	14935.9	14957.3	14920	14924.1	14940.2	14916.9	14912.3	15013.4	14955.1	14943.7	15038.7	14950.5	14936.8
77	[Fe(B*)(O)]-	-1	2	5	-0.42		14276.6	14391.9	14375.8	14386.8	14362.9	14364.2	14372.7	14359.6	14354.7	14431.9	14384.9	14375.5	14456	14356.5	14014.1	14098.2	14090.8	14093.6	14082.7	14083.5	14085.8	14080.6	14077.5	14110.4	14092.1	14087.3	14093.3	14076.6	14835.2	14964.5	14937.5	14958.9	14921.6	14925.8	14941.9	14918.5	14914	15014.8	14956.6	14945.3	15040.4	14952.1	14938.5
78	[Fe(cyclam-acetate)(N)]PF6	1	2	5	-0.02		14275.4	14390.7	14374.5	14385.6	14361.6	14362.7	14371.1	14358.2	14353.1	14430.4	14383.3	14373.8	14454.3	14354.9	14012.8	14096.9	14089.4	14092.2	14081.4	14081.8	14084.1	14079.2	14075.9	14108.8	14090.5	14085.5	14091.5	14074.9	14833.8	14963.1	14936.2	14957.5	14920.2	14924.1	14940.2	14917.1	14912.3	15013.2	14954.9	14943.5	15038.5	14950.6	14936.7
79	[Fe(Me3cyclam-acetate)(N)](PF6)2	2	1	6	-0.29		14276.3	14391.5	14375.4	14386.5	14362.5	14363.8	14372.2	14359.2	14354.2	14431.4	14384.3	14375	14455.5	14356.4	14013.6	14097.7	14090.3	14093.1	14082.3	14082.9	14085.2	14080.1	14077	14109.9	14091.5	14086.7	14092.7	14076.4	14834.7	14964	14937	14958.4	14921.1	14925.3	14941.4	14918.1	14913.4	15014.3	14956	14944.7	15039.7	14951.6	14938
80	[(TIMMN_Mes)Fe(N)(F)]3+	3	2	7	-0.72		14277.4	14392.6	14376.5	14387.6	14363.5	14364.8	14373.2	14360.2	14355.2	14432.4	14385.3	14376	14456.4	14357	14014.7	14098.9	14091.4	14094.2	14083.3	14083.9	14086.2	14081.2	14078	14110.8	14092.5	14087.7	14093.7	14077	14835.8	14965.2	14938.2	14959.6	14922.2	14926.3	14942.4	14919.1	14914.5	15015.3	14957	14945.8	15040.7	14952.7	14939
[truncated: 22 more columns]

## Sheet: High-T RHO(0)
				Fe	Exp.
# complex	Name	Charge	2S + 1	OS	IS (mm/s)		TPSS0/s-dec aVTZ-J	B3LYP/CP(PPP)	PBE0/s-dec aVTZ-J
1	PcFe(iPrNH2)2	0	1	2	0.25		14910.5	14363.7	14922.4
2	PcFe(dabco)2	0	1	2	0.33		14910.3	14363.6	14922.2
3	PcFe(Pz)2	0	1	2	0.26		14910.6	14363.9	14922.5
4	PcFe(THT)2	0	1	2	0.27		14910.5	14363.8	14922.4
5	PcFe(CO)(Py)	0	1	2	0.11		14911.3	14364.5	14923.2
6	PcFe(CO)(NH3)	0	1	2	0.12		14911.2	14364.4	14923.1
7	PcFe(PEt3)2	0	1	2	0.16		14910.9	14364.1	14922.8
8	PcFe(Et2NH)2	0	1	2	0.25		14910.4	14363.7	14922.3
9	PcFe(MeIm)2	0	1	2	0.24		14910.6	14363.9	14922.5
10	PcFe(Iz)2	0	1	2	0.27		14910.7	14363.9	14922.6
11	PcFe(Pyr)2	0	1	2	0.24		14910.7	14364	14922.6
12	PcFe(Tetr)2	0	1	2	0.15		14911	14364.3	14923
13	PcFe(CO)(THF)	0	1	2	0.1		14911.2	14364.5	14923.2
14	PcFe(CO)(Pip)	0	1	2	0.11		14911.2	14364.4	14923.1
15	PcFe(P(OEt)3)2	0	1	2	0.13		14911.1	14364.3	14923
16	Fc(CO2H)	0	1	2	0.44		14910.3	14363.4	14922.1
17	PcFe(mepip)2	0	1	2	0.27		14910.5	14363.8	14922.4
18	{Fe[HC(3,5-Me2pz)3]2}I2 (HS)	0	5	2	0.97		14907.5	14361	14919.5
19	[Fe(acpa)2]PF6 (HS)	1	6	3	0.33		14910.3	14363.4	14922.1
20	Fe(thpu)(Hthpu) (HS)	0	6	3	0.47		14910.3	14363.4	14922.2
21	[Fe(bipy)2Cl2]+	1	6	3	0.42		14910.5	14363.6	14922.3

## Sheet: B3LYP ΔEq
				Fe	Exp.		Non Relativistic	CP(PPP)	x2c-tzvppall	x2c-tzvppall-s	aVTZ-J	dkh-def2-tzvpp	ANO-RCC-TZ	s-dec. x2c-TZVPPall	s-dec. aVTZ-J	s-dec. aVTZ-J (-dfg)	aVTZ-Jmod
# complex	Name	Charge	2S + 1	OS	|ΔEq| mm/s
1	[Fe(CO)4H]-	-1	1	0	1.36		1.30041	1.27505	1.19331	1.29814	1.35159	1.15957	1.22077	1.19087	1.3572	1.37019	1.35719
2	[Fe(CO)5]	0	1	0	2.57		2.49471	2.43545	2.18546	2.49886	2.56254	2.26987	2.27105	2.18222	2.56302	2.58208	2.56304
3	[Fe(η4-butadiene)(CO)3]	0	1	0	1.34		-1.46349	-1.44851	-1.386	-1.4402	-1.48282	-1.35498	-1.41891	-1.38316	-1.4957	-1.50197	-1.49571
4	Fe(CO)3(cyclo-butadiene)	0	1	0	1.52		1.62751	1.62845	1.59137	1.56419	1.63965	1.46879	1.57696	1.58859	1.65515	1.65926	1.65516
5	MeLMe,MeFe(CNXyl)3	0	2	1	0.81		-1.12616	-0.815328	-0.70029	-0.833504	-0.854427	-0.758807	0.774291	-0.698051	-0.85106	-0.856267	-0.851061
6	LMeFe(η6-C6H6)	0	2	1	0.74		-1.34934	-1.14705	-1.05167	-1.13394	-1.20522	-0.981067	-1.07137	-1.04752	-1.19677	-1.2072	-1.19674
7	MeLMe,MeFe(CO)3	0	2	1	0.77		-0.982368	-0.841317	-0.733655	-0.847701	-0.890414	0.732288	0.777321	-0.729968	-0.885357	-0.893893	-0.885361
8	Fe(phen)2(NCS)2 (LS)	0	1	2	0.34		-0.40463	-0.451064	-0.342869	-0.482956	-0.465089	-0.471386	-0.440703	-0.344012	-0.466524	-0.464257	-0.466517
9	Fe(LN4)(NCS)2 (LS)	0	1	2	0.77		-0.750929	0.902899	0.703206	0.959716	0.926911	0.930721	0.967038	0.705932	0.927521	0.924038	0.927499
10	Fc D5d	0	1	2	2.4		3.08674	2.97562	3.05032	2.85678	3.12624	2.54654	2.88756	3.02676	3.14134	3.1432	3.14134
11	[Fe(pyS4)(PH3)]	0	1	2	0.69		0.699043	0.718009	0.68961	0.709475	0.725389	0.661767	0.70571	0.688308	0.726271	0.734088	0.726275
12	[Fe(pyS4)(CO)]	0	1	2	0.88		0.972627	1.01888	0.940677	1.01026	0.99772	0.990644	1.00587	0.940513	1.00292	1.0067	1.00292
13	CpFe(CO)2Cl	0	1	2	1.82		1.91897	1.90351	1.86514	1.85314	1.97577	1.70471	1.83392	1.86337	1.9867	1.98384	1.98671
14	[Fe(OEP)(CO)]	0	1	2	1.84		1.65575	1.76742	1.52822	1.84981	1.84631	1.77786	1.73057	1.53245	1.86064	1.85892	1.86065
15	[Fe(PyO)I(CO)2PPh3]	0	1	2	0.48		0.398517	0.491637	0.46601	0.488988	0.519017	0.440339	0.520407	0.463649	0.519648	0.526118	0.519648
16	[Fe(PyS)I(CO)2PPh3]	0	1	2	0.35		-0.316307	0.252237	-0.253848	0.239067	-0.23388	0.283939	0.259997	-0.252777	-0.238348	-0.235447	-0.238352
17	CpFe(CO)2Me	0	1	2	1.76		2.01413	1.96783	1.93793	1.92132	2.05838	1.72061	1.86951	1.93333	2.06377	2.0675	2.06375
18	[{Fe–NO}6(pyS4)]+	1	1	2	1.63		-1.98978	-1.87092	-1.66348	-1.86794	-1.96041	-1.68646	-1.67674	-1.66081	-1.95573	-1.96902	-1.95573
19	[CpFe(CO)3]+	1	1	2	1.88		1.95118	1.93559	1.90152	1.88586	1.99948	1.73313	1.875	1.89958	2.01442	2.01535	2.01442
20	[Fe(bipy)3](ClO4)2	2	1	2	0.39		-0.326846	-0.33284	-0.315196	-0.318569	-0.352342	-0.263746	-0.283825	-0.313431	-0.349181	-0.347453	-0.349173
21	[Fe(phen)3](ClO4)2	2	1	2	0.23		-0.239657	-0.243299	-0.250006	-0.230645	-0.265823	-0.185034	-0.217564	-0.247827	-0.263328	-0.261655	-0.263318
22	{Fe[HC(3,5-Me2pz)3]2}I2 (LS)	0	1	2	0.21		-1.06297	-0.439029	-0.402834	-0.440473	-0.429244	-0.432199	-0.430043	-0.402021	-0.430721	-0.433403	-0.430689
23	Fc(CO2H)2	0	1	2	2.16		2.86404	2.72844	2.82194	2.60077	2.8682	2.31094	2.66836	2.79849	2.87981	2.8818	2.8798
24	[Fe(pyS4)(SMe2)]	0	1	2	0.43		-0.487868	-0.457771	-0.447572	-0.454421	-0.46342	-0.418978	-0.424712	-0.445836	-0.463914	-0.472149	-0.463881
25	PcFePy2	0	1	2	1.96		1.55995	1.45023	1.25481	1.47147	1.46784	1.4104	1.3866	1.25989	1.47083	1.46961	1.47082
26	[Fe(SC5H4N-CO)I(CO)2(ArNC)]	0	1	2	0.29		0.20001	0.249715	0.266563	0.23685	0.248776	0.229771	0.247344	0.26536	0.250026	0.256757	0.250034
27	[(TIMMN_Mes)Fe(NAd)]	0	1	2	0.41		-0.045564	-0.165707	-0.192708	-0.222458	-0.124028	-0.33907	-0.286862	-0.196836	-0.147394	-0.147675	-0.147389
28	FcC≡CH	0	1	2	2.34		3.03922	2.90942	2.98118	2.7911	3.05715	2.48882	2.8313	2.95774	3.07152	3.07357	3.07153
29	FcCN	0	1	2	2.36		3.01829	2.89252	2.96649	2.77459	3.03948	2.47312	2.81332	2.94317	3.05353	3.05589	3.05351
30	Fc(COMe)	0	1	2	2.27		2.91895	2.76941	2.86007	2.64067	2.90868	2.34695	2.69814	2.83662	2.9208	2.92199	2.92085
31	Fc(COMe)2	0	1	2	2.27		2.84906	2.71035	2.80212	2.58304	2.84963	2.29476	2.65566	2.77886	2.86062	2.86228	2.86062
32	Fc(CO2Me)	0	1	2	2.3		2.93285	2.79162	2.88084	2.66092	2.93061	2.36568	2.71494	2.85734	2.94316	2.9443	2.94319
33	Fc(CO2Me)2	0	1	2	2.34		2.87244	2.73531	2.82231	2.60804	2.87388	2.31939	2.67995	2.79898	2.88593	2.88774	2.88593
34	[{Fe-NO}7(pyS4)]	0	2	2	0.4		0.310767	0.295116	0.319346	0.282513	0.267129	0.305402	0.3142	0.319025	0.269173	0.273534	0.269206
35	[Fe(OEP)]	0	3	2	1.71		0.353399	0.518305	1.00431	0.723999	0.634111	1.47209	0.723821	0.400554	1.2179	1.21149	1.21745
36	[Fe(TPP)]	0	3	2	1.51		1.19726	1.28352	1.05072	1.38132	1.23364	1.51534	1.38804	1.05886	1.26212	1.25627	1.26213
37	Fe(phen)2(NCS)2 (HS)	0	5	2	2.82		-3.07274	-3.14087	-2.64925	-3.22389	-3.26352	-2.97424	-2.90986	-2.64953	-3.27189	-3.28013	-3.26757
38	Fe(cis-phen)2Cl2	0	5	2	3.26		-3.07277	-2.85373	-2.41192	-2.90107	-2.99116	-2.65519	-2.59359	-2.41089	-2.99878	-2.99758	-2.99878
39	[Fe(LN4)(NCS)2] (HS)	0	5	2	2.512		2.45122	2.78666	2.30164	2.86313	2.91748	2.6199	2.57557	2.30199	2.9202	2.92768	2.92136
40	[FeS4C8O4]2–	-2	5	2	4.01		-4.07476	-4.07164	-3.26513	-4.1312	-4.14502	-3.8565	-3.72447	-3.26816	-4.15502	-4.1702	-4.15499
41	[Fe(SPh)4]2–	-2	5	2	3.24		-3.12661	3.21925	2.66974	3.3049	3.36083	3.04746	2.95176	2.6703	3.37061	3.36942	3.3706
42	[Ba(18-crown-6)(H2O(OH)][Fe(NCS)4]	-2	5	2	2.83		3.29099	3.26598	2.75932	3.30594	3.38465	3.01874	2.95749	2.75881	3.39029	3.39644	3.39023
43	[Fe(SR)3]-; R=C6H2-2,4,6-tBu3	-1	5	2	0.83		-1.42766	-1.29654	-0.939312	-1.24273	-1.25231	-1.10614	-1.07093	-0.941454	-1.24063	-1.25168	-1.24023
44	Na[Fe(CH3CO2)TPpivP]	-1	5	2	4.25		4.27831	4.0072	3.37873	4.06645	4.062	3.76042	3.82886	3.37354	4.07441	4.11156	4.07442
45	MeLMe,Me2Fe	0	5	2	1.8		2.02925	1.81434	1.45876	1.84108	1.91754	1.61311	1.62852	1.45718	1.90682	1.91234	1.90683
46	[Fe(bipy)3](ClO4)3	3	2	3	1.76		1.99995	2.0658	1.75459	2.15257	2.15724	2.02683	2.01195	1.7571	2.16644	2.17025	2.16644
47	[Fe(phen)3](ClO4)3	3	2	3	1.67		2.0979	2.16784	1.82612	2.26008	2.26745	2.11693	2.0927	1.82889	2.2763	2.27984	2.27638
48	[Fe(terpy)2](ClO4)3	3	2	3	3.32		-3.15599	-3.26093	-2.73531	-3.3415	-3.3083	-3.16848	-3.08417	-2.73924	-3.31862	-3.3285	-3.31897
49	[Fe-trans-(cyclam)(N3)2]PF6	1	2	3	2.241		-1.82504	-1.88741	-1.54399	-1.98308	-1.99859	-1.83054	-1.83705	-1.54753	-2.0017	-2.00353	-2.00141
50	Fe(OEPPY)	1	2	3	2.15		-2.33555	-2.23544	-1.75345	-2.36262	-2.34312	-2.20721	-2.15005	-1.75775	-2.34377	-2.34861	-2.34378
51	[Fe(acpa)2]PF6 (LS)	1	2	3	2.24		2.21445	2.24696	1.92871	2.32312	2.34068	2.17629	2.15887	1.92878	2.34952	2.34885	2.3495
52	Fe(thpu)(Hthpu) (LS)	0	2	3	3.09		-3.40864	-3.45026	-2.88821	-3.55196	-3.52839	-3.37305	-3.26615	-2.89294	-3.54163	-3.54022	-3.54163
53	[(TIMMN_Mes)Fe(NAd)]+	1	2	3	2.54		2.22516	2.36422	2.11094	2.39015	2.56548	2.06993	2.20296	2.10551	2.56136	2.56203	2.56137
54	[Cp*2Fe]+	1	2	3	0		0.274213	0.186062	0.667084	-0.024133	0.18089	-0.089924	0.349417	0.646636	0.180575	0.181929	0.180439
55	Fe(mnt)2(idzm)	0	4	3	2.64		2.97042	3.14545	2.7783	3.18663	3.20832	3.09498	2.96537	2.78259	3.23131	3.21943	3.23131
56	[Fe(η4-MAC*)Cl]2−	-2	4	3	3.6		3.22568	3.35072	2.91662	3.42472	3.42251	3.32021	3.30378	2.92123	3.45471	3.4447	3.4547
57	Fe(S-t-Bu)3NO	-1	4	3	0.46		-0.664549	-0.550338	-0.437925	-0.572131	-0.558613	-0.569642	-0.533448	-0.439998	-0.569733	-0.566074	-0.569734
58	[Fe(SEt)4]−	-1	6	3	0.62		-0.516805	-0.698898	-0.507409	-0.739121	-0.694158	-0.739452	-0.681377	-0.50962	-0.696332	-0.698422	-0.696286
59	Fe(NO)2(S(p-Me)Ph)2−	-1	6	3	0.69		-1.01431	-1.11791	-0.879366	-1.19355	-1.13253	-1.16311	-1.09197	-0.879337	-1.1435	-1.14398	-1.14352
60	[Fe(C33H37N4)Cl]	0	6	3	1.36		-0.500827	0.572994	-0.386219	0.601347	0.557581	0.628784	0.608585	-0.392485	0.564998	0.559192	0.565
61	[Fe(porphyrin)(OCOCH3)]	0	6	3	1.1		0.13076	0.207326	-0.124734	0.21967	-0.19138	0.258629	0.22827	-0.126552	-0.19158	-0.18628	-0.191611
62	Fe(acac)3	0	6	3	0.64		0.59674	0.600617	0.406734	0.64161	0.591765	0.66162	0.65423	0.408511	0.593808	0.598314	0.593793
63	Fe(tfa)3	0	6	3	0.67		0.632446	0.642548	0.445609	0.683434	0.634994	0.700497	0.694072	0.447412	0.637374	0.641289	0.637378
64	[Fe(phen)2Cl2]+	1	6	3	0.05		-0.71985	-0.666413	-0.666067	-0.668449	-0.683798	-0.633471	-0.573756	-0.664592	-0.687534	-0.688028	-0.687541
65	PcFeCl	0	6	3	2.56		1.20241	0.505851	0.330007	0.528455	0.488174	0.559338	0.554966	0.336227	0.494844	0.488633	0.494832
66	MeLMe,MeFeCl2	0	6	3	1.23		-0.97289	-1.04757	-1.02109	-1.06925	-1.10257	-1.00522	-1.02894	-1.01764	-1.11013	-1.11237	-1.1102
67	[Cp*2Fe(CO)]2+	2	1	4	3.22		-3.41233	-3.39083	-3.33003	-3.38446	-3.6004	-3.0436	-3.29558	-3.3147	-3.60809	-3.60915	-3.60809
68	[(TIMMN_Mes)Fe(NAd)]2+	2	1	4	3.54		4.07633	4.15897	3.83995	4.2144	4.4219	3.82925	4.01443	3.83012	4.43002	4.43307	4.43004
69	[(N3N′)Fe(CN)]	0	1	4	3.22		-3.62405	-3.4009	-2.83369	-3.5035	-3.58552	-3.21656	-3.21726	-2.83617	-3.5828	-3.5765	-3.58279
70	Fe(PPh3)2(“S2”)2	0	3	4	1.52		2.05462	1.95192	1.65478	2.02298	2.04182	1.88735	1.76907	1.65502	2.04623	2.04441	2.04612
71	Fe(PPh3)(“S2”)2	0	3	4	3.03		3.19746	3.36733	3.00131	3.43105	3.44485	3.3152	3.16729	3.00634	3.46755	3.45977	3.46755
72	[Fe(N4Py)(O)](ClO4)2	2	3	4	0.93		0.723002	0.701621	0.594402	0.725265	0.846421	0.54046	0.640266	0.594686	0.845682	0.844808	0.845725
73	[Fe(O)(TMC)(NCCH3)]2+	2	3	4	1.24		0.905776	0.86704	0.657296	0.937843	1.03302	0.75506	0.862053	0.657863	1.01718	1.01848	1.01717
74	[Cp*2Fe]2+ (linear)	2	3	4	2		2.33273	2.50856	2.63072	2.42367	2.7058	2.09084	2.53528	2.61091	2.71473	2.71606	2.71472
75	[Fe(O)(porphyrin)]+	1	4	4	1.62		-2.25088	2.27242	1.9226	2.35593	2.41122	2.22403	2.22712	1.92564	2.42564	2.41684	2.42564
76	[Fe(η4-MAC*)Cl]−	-1	5	4	0.89		-0.828882	-0.872564	-0.781194	-0.903103	-0.880722	-0.916467	-0.877411	-0.783477	-0.89159	-0.891112	-0.891614
77	[Fe(B*)(O)]-	-1	2	5	4.25		4.26194	4.37953	3.77792	4.48898	4.58469	4.1887	4.1569	3.78024	4.60138	4.59596	4.60139
78	[Fe(cyclam-acetate)(N)]PF6	1	2	5	1.6		1.83323	1.77871	1.56992	1.83163	1.84177	1.71875	1.65089	1.57125	1.84766	1.84905	1.84767
79	[Fe(Me3cyclam-acetate)(N)](PF6)2	2	1	6	1.53		0.679186	0.605023	-0.382935	0.681529	0.848612	0.470719	0.602742	-0.381194	0.830132	0.836174	0.830143
80	[(TIMMN_Mes)Fe(N)(F)]3+	3	2	7	3.2		3.79588	4.33939	4.01118	4.40289	4.63337	4.05659	4.273	4.00035	4.65805	4.66157	4.65803

## Sheet: Other DFT ΔEq
				Fe	Exp.		CP(PPP)														DKH-def2-TZVPP														s-dec. aVTZ-J
# complex	Name	Charge	2S + 1	OS	|ΔEq| mm/s		VWN5	BP86	PBE	BLYP	TPSS	PBE0	B1LYP	TPSSh	TPSS0	M06	LC-BLYP	CAM-B3LYP	wB97X	B2PLYP	VWN5	BP86	PBE	BLYP	TPSS	PBE0	B1LYP	TPSSh	TPSS0	M06	LC-BLYP	CAM-B3LYP	wB97X	B2PLYP	VWN5	BP86	PBE	BLYP	TPSS	PBE0	B1LYP	TPSSh	TPSS0	M06	LC-BLYP	CAM-B3LYP	wB97X	B2PLYP	B10LYP
1	[Fe(CO)4H]-	-1	1	0	1.36		1.08028	1.1485	1.12828	1.15867	1.16821	1.28202	1.29941	1.22464	1.29842	1.41001	1.31	1.34991	1.38128	1.36412	0.966672	1.03462	1.01583	1.04379	1.05018	1.16783	1.1854	1.10649	1.18113	1.3169	1.18483	1.22991	1.25494	1.25999	1.14757	1.21869	1.19738	1.22849	1.23409	1.36597	1.38437	1.29647	1.37825	1.47288	1.39791	1.43994	1.47654	1.45864	1.29626
2	[Fe(CO)5]	0	1	0	2.57		2.05123	2.12834	2.09701	2.14324	2.16174	2.46733	2.49354	2.30008	2.48	2.67946	2.53083	2.59507	2.6037	2.67494	1.89014	1.97167	1.93865	1.98624	2.00329	2.29778	2.32829	2.13714	2.31248	2.52794	2.35221	2.42169	2.42029	2.51431	2.1616	2.24075	2.20974	2.25723	2.26455	2.59619	2.62376	2.40976	2.58984	2.76744	2.66332	2.72991	2.74715	2.81046	2.41808
3	[Fe(η4-butadiene)(CO)3]	0	1	0	1.34		-1.36677	-1.35491	-1.343	-1.36207	-1.34108	-1.45286	-1.46354	-1.38333	-1.43876	-1.49859	-1.58255	-1.54333	-1.5487	-1.50776	-1.27792	-1.26801	-1.25849	-1.2711	-1.25525	-1.36412	-1.37002	-1.29593	-1.34995	-1.4168	-1.47827	-1.4439	-1.44846	-1.41764	-1.40528	-1.39173	-1.37829	-1.39909	-1.37247	-1.5002	-1.51239	-1.41982	-1.48165	-1.53751	-1.63819	-1.59777	-1.60654	-1.55984	-1.44886
4	Fe(CO)3(cyclo-butadiene)	0	1	0	1.52		1.55661	1.5327	1.51898	1.53369	1.50522	1.64483	1.64735	1.55306	1.62282	1.64019	1.76817	1.7296	1.72919	1.75324	1.39898	1.37975	1.37073	1.37418	1.35952	1.4949	1.4878	1.40637	1.47522	1.48989	1.59458	1.56347	1.56927	1.59594	1.57896	1.55208	1.53791	1.55257	1.51826	1.67353	1.67571	1.56993	1.64621	1.66443	1.80076	1.76236	1.762	1.79248	1.60354
5	MeLMe,MeFe(CNXyl)3	0	2	1	0.81		-0.669454	-0.687164	-0.687004	-0.6911	-0.675804	-0.864614	-0.856931	-0.728497	-0.837869	-0.959293	0.836003	-0.892476	-0.923133	-1.11137	-0.6312	-0.645278	-0.644574	-0.648609	-0.629101	-0.801073	-0.797301	-0.673953	-0.770525	-0.888775	0.77926	0.828567	0.849804	1.03466	-0.693925	-0.711068	-0.709809	-0.71737	-0.69587	-0.899999	-0.894835	-0.752756	-0.868535	-0.97816	-0.868238	-0.931211	-0.962418	-1.15437	-0.774073
6	LMeFe(η6-C6H6)	0	2	1	0.74		-0.757265	-0.786383	-0.766406	-0.811871	-0.783053	-1.1541	-1.23536	-0.929536	-1.16357	-1.2489	-1.23135	-1.34112	-1.3093	-1.39911	-0.596298	-0.632235	-0.612006	-0.657066	-0.627367	-0.984244	-1.06791	-0.769017	-0.995628	-1.08411	-1.04381	-1.16023	-1.11416	-1.22717	-0.807296	-0.828453	-0.805695	-0.854753	-0.812998	-1.19864	-1.28635	-0.96264	-1.20132	-1.2433	-1.28496	-1.39469	-1.36008	-1.44648	-1.0177
7	MeLMe,MeFe(CO)3	0	2	1	0.77		-0.714469	-0.72753	-0.720372	-0.731866	-0.71358	-0.887276	-0.882373	-0.760732	-0.872482	-1.00453	0.832339	0.905186	0.927708	1.14512	0.608868	0.622865	0.615705	-0.627953	-0.603237	0.771925	0.772018	0.647249	0.751402	-0.881638	0.721141	0.789748	0.803827	1.02506	-0.754022	-0.763073	-0.754044	-0.770389	-0.741613	-0.929087	-0.927925	-0.791479	-0.908331	-1.02505	0.87321	-0.951	-0.973051	-1.19503	-0.815646
8	Fe(phen)2(NCS)2 (LS)	0	1	2	0.34		-0.716057	-0.693286	-0.697892	-0.693461	-0.647053	-0.399485	-0.383256	-0.540828	-0.358486	-0.434291	-0.329974	-0.297026	-0.26094	-0.159396	-0.719545	-0.70166	-0.705094	-0.703382	-0.657577	-0.420158	-0.407898	-0.555981	-0.384191	-0.418453	-0.355324	-0.326141	-0.28662	0.202316	-0.740473	-0.712561	-0.71855	-0.71242	-0.661731	-0.415752	-0.396285	-0.555542	-0.370098	-0.458928	-0.344129	-0.308498	-0.271775	-0.16329	-0.604691
9	Fe(LN4)(NCS)2 (LS)	0	1	2	0.77		1.39006	1.30953	1.32114	1.28656	1.18831	0.844988	0.799914	1.01589	0.754787	0.973066	0.798293	0.703891	0.660965	0.446062	1.39092	1.32242	1.33131	1.30203	1.20249	0.871501	0.831116	1.0361	0.784913	0.951857	0.827163	0.737581	0.688453	0.485348	1.43491	1.34583	1.35849	1.32305	1.21183	0.867605	0.819369	1.03635	0.767093	1.00869	0.818614	0.719761	0.674264	-0.447635	1.12856
10	Fc D5d	0	1	2	2.4		2.21596	2.2586	2.21847	2.31119	2.27075	3.03885	3.1544	2.5837	3.06955	2.99579	3.15149	3.33324	3.30318	4.06206	1.81414	1.86676	1.83862	1.90152	1.90017	2.63243	2.72034	2.20228	2.6707	2.59372	2.68284	2.87698	2.84602	3.60301	2.34797	2.38575	2.3433	2.44654	2.38809	3.20041	3.32813	2.7157	3.22345	3.09654	3.32548	3.51443	3.46643	4.26875	2.79154
11	[Fe(pyS4)(PH3)]	0	1	2	0.69		0.523267	0.543791	0.533631	0.543438	0.569803	0.745765	0.740004	0.664298	0.753691	0.790619	0.852009	0.807224	0.826212	0.765409	0.470426	0.491774	0.482861	0.491207	0.520734	0.690048	0.683469	0.612469	0.699331	0.736197	0.789487	0.748007	0.76914	0.711237	0.539192	0.558577	0.547912	0.557388	0.580012	0.753713	0.747142	0.671734	0.758918	0.791995	0.86002	0.814478	0.831888	0.769689	0.65409
12	[Fe(pyS4)(CO)]	0	1	2	0.88		0.884063	0.884514	0.877219	0.885869	0.905751	1.03787	1.04043	0.971818	1.0453	1.07845	1.11319	1.09142	1.10489	1.12142	0.867472	0.864183	0.857977	0.863194	0.884805	1.01075	1.01154	0.946946	1.0173	1.05308	1.08799	1.06364	1.08011	1.08911	0.873949	0.871171	0.860859	0.873274	0.883516	1.01805	1.02238	0.948915	1.01994	1.06701	1.09863	1.07369	1.08369	1.09357	0.946757
13	CpFe(CO)2Cl	0	1	2	1.82		1.65979	1.65826	1.63999	1.66664	1.65421	1.94162	1.95719	1.7674	1.93398	1.96713	2.0726	2.07198	2.09545	2.19486	1.47856	1.48012	1.46585	1.47828	1.48467	1.75311	1.75682	1.59101	1.74969	1.78033	1.86016	1.86467	1.89283	1.99449	1.73045	1.72331	1.70371	1.73329	1.70993	2.02604	2.04341	1.83188	2.00967	2.02914	2.16466	2.16454	2.18292	2.29272	1.86059
14	[Fe(OEP)(CO)]	0	1	2	1.84		1.97564	1.91704	1.93834	1.90561	1.86729	1.75107	1.71608	1.80981	1.69211	1.6413	1.79836	1.70523	1.65038	1.41226	1.9697	1.92218	1.94008	1.90404	1.88469	1.76986	1.72984	1.83288	1.72422	1.59451	1.81443	1.72383	1.67314	1.44615	2.07846	2.02281	2.04985	2.00605	1.96934	1.85324	1.80653	1.90951	1.78748	1.75099	1.89036	1.7946	1.74484	1.49123	1.93782
15	[Fe(PyO)I(CO)2PPh3]	0	1	2	0.48		0.476048	0.455766	0.453084	0.462929	0.424352	0.486095	0.486151	0.440916	0.450501	0.618312	0.527698	0.501779	0.504877	-0.481208	0.437724	0.416196	0.415618	0.419126	0.395447	0.439194	0.438645	0.404619	0.416008	0.543169	0.474734	0.454847	0.456994	-0.466059	0.49666	0.47796	0.474809	0.486059	0.441148	0.513653	0.512508	0.462066	0.470317	0.636368	0.554911	0.527241	0.530747	-0.481844	0.510861
16	[Fe(PyS)I(CO)2PPh3]	0	1	2	0.35		0.305701	0.286448	0.285542	0.278908	0.282393	-0.258151	-0.253954	0.263848	0.264991	0.243746	-0.290413	-0.275435	-0.277775	0.382142	0.36911	0.338686	0.338532	0.326175	0.338174	0.292246	0.285897	0.311512	0.307582	0.210816	0.326312	0.308546	0.305873	0.418973	0.287152	0.263946	0.26161	0.260181	0.252759	-0.240123	-0.237963	0.236892	-0.236298	0.253045	-0.278041	-0.259003	-0.260663	0.349881	0.243596
17	CpFe(CO)2Me	0	1	2	1.76		1.676	1.67664	1.65406	1.67917	1.66101	2.01988	2.03547	1.80121	2.00843	2.03931	2.07863	2.13011	2.12896	2.35613	1.43192	1.44087	1.42289	1.43582	1.43797	1.78262	1.78801	1.57506	1.77807	1.79434	1.81254	1.87291	1.87435	2.1091	1.76272	1.76117	1.73869	1.76439	1.7368	2.11728	2.13334	1.88253	2.09773	2.10283	2.17835	2.23162	2.22464	2.46331	1.91439
18	[{Fe–NO}6(pyS4)]+	1	1	2	1.63		-1.62738	-1.64956	-1.6358	-1.67186	-1.59224	-1.87723	-1.88926	-1.70408	-1.80493	-1.96946	-1.94167	-1.93943	-1.91985	-1.82104	-1.4252	-1.46579	-1.45123	-1.48551	-1.4216	-1.69699	-1.70968	-1.53212	-1.63776	-1.73449	-1.73922	-1.75342	-1.73658	-1.67637	-1.69406	-1.72453	-1.71128	-1.74975	-1.65758	-1.96183	-1.97458	-1.77448	-1.88035	-2.03216	-2.01539	-2.02152	-2.00538	-1.90073	-1.87265
19	[CpFe(CO)3]+	1	1	2	1.88		1.73975	1.73439	1.71602	1.747	1.72009	1.9588	1.97782	1.81249	1.94572	1.97588	2.08703	2.07897	2.08465	2.17435	1.54452	1.54313	1.52883	1.54648	1.53542	1.76734	1.77486	1.62584	1.75637	1.78662	1.86726	1.86656	1.87941	1.97125	1.80994	1.79964	1.77953	1.81299	1.77713	2.03804	2.05928	1.87576	2.01862	2.03991	2.17484	2.16587	2.1703	2.26885	1.91487
20	[Fe(bipy)3](ClO4)2	2	1	2	0.39		-0.53697	-0.496956	-0.500626	-0.484057	-0.42931	-0.314288	-0.29285	-0.362054	-0.264817	-0.398546	-0.310427	-0.266268	-0.255539	-0.149904	-0.452419	-0.418207	-0.422381	-0.404036	-0.353697	-0.249213	-0.226538	-0.29142	-0.201392	-0.325401	-0.236794	-0.199472	-0.192017	-0.095702	-0.570682	-0.523185	-0.52748	-0.508556	-0.447637	-0.330766	-0.306467	-0.377358	-0.274949	-0.414742	-0.327126	-0.279442	-0.266021	-0.156232	-0.428092
21	[Fe(phen)3](ClO4)2	2	1	2	0.23		-0.423382	-0.395698	-0.398926	-0.385145	-0.344836	-0.224143	-0.207141	-0.280943	-0.187898	-0.291269	-0.205613	-0.175102	-0.163859	-0.08397	-0.352512	-0.328743	-0.332669	-0.316914	-0.279929	-0.169796	-0.151163	-0.22062	-0.134285	-0.234264	-0.144005	-0.119136	-0.111838	-0.037585	-0.459116	-0.425361	-0.429102	-0.413091	-0.368182	-0.24432	-0.224677	-0.30128	-0.203738	-0.31273	-0.225355	-0.19172	-0.178056	-0.094067	-0.338941
22	{Fe[HC(3,5-Me2pz)3]2}I2 (LS)	0	1	2	0.21		-0.883546	-0.78482	-0.793209	-0.72614	-0.668767	-0.416338	-0.401358	-0.505071	-0.387003	-0.478766	-0.514492	-0.379926	-0.361501	-0.312395	-0.862722	-0.771252	-0.779216	-0.715514	-0.655954	-0.408534	-0.393002	-0.496535	-0.376595	-0.47289	-0.507119	-0.373023	-0.35237	-0.293896	-0.894822	-0.793892	-0.797924	-0.725473	-0.669145	-0.411059	-0.393483	-0.500334	-0.385416	-0.446472	-0.504425	-0.373164	-0.357144	0.320545	-0.530496
23	Fc(CO2H)2	0	1	2	2.16		1.92673	1.96425	1.92396	2.01637	1.97648	2.80093	2.92032	2.31173	2.83307	2.76826	2.9475	3.12449	3.10859	3.88323	1.53991	1.58776	1.5593	1.62178	1.62174	2.40531	2.49683	1.94435	2.4458	2.38115	2.48746	2.67882	2.66114	3.4319	2.04201	2.07599	2.03224	2.13371	2.07974	2.94961	3.08016	2.43078	2.97574	2.85437	3.10811	3.29284	3.26014	4.07962	2.50377
24	[Fe(pyS4)(SMe2)]	0	1	2	0.43		-0.419264	-0.423576	-0.419352	-0.429994	-0.384889	0.463368	-0.463535	-0.407322	0.448144	-0.576521	-0.569616	0.517574	0.529328	0.448182	-0.368297	-0.377721	-0.373996	-0.386554	-0.34332	-0.422084	-0.425366	-0.367708	0.408189	-0.549365	-0.527824	-0.478204	-0.492106	0.411802	-0.44489	-0.445645	-0.441467	-0.449901	-0.402543	0.468507	-0.466947	-0.41772	0.450847	-0.569477	-0.572036	0.518784	0.529674	0.446642	-0.448686
25	PcFePy2	0	1	2	1.96		1.89719	1.85776	1.87164	1.87317	1.76289	1.35565	1.34213	1.57173	1.28016	1.43077	1.39016	1.25357	1.21702	0.897404	1.83152	1.79951	1.81248	1.81019	1.70798	1.32525	1.30804	1.52788	1.25284	1.35052	1.35947	1.2272	1.19542	0.885475	1.94987	1.89875	1.91432	1.91115	1.79131	1.37729	1.3576	1.59314	1.29352	1.46583	1.41508	1.26855	1.23371	0.89428	1.69367
26	[Fe(SC5H4N-CO)I(CO)2(ArNC)]	0	1	2	0.29		0.222149	0.211778	0.218221	0.215451	0.188188	0.260598	0.261113	0.208416	0.251927	0.36315	0.274991	0.283785	0.302636	-0.395476	0.191222	0.174865	0.181859	0.175528	0.170653	0.246751	0.248004	0.196989	0.25344	0.331089	-0.278396	-0.282764	-0.305478	-0.406763	0.227101	0.223233	0.229194	0.223066	0.195185	0.260331	0.258925	0.211342	0.246979	0.356973	0.267304	0.277563	0.29556	-0.388995	0.234879
27	[(TIMMN_Mes)Fe(NAd)]	0	1	2	0.41		-0.331923	-0.332502	-0.337162	-0.367411	-0.343264	-0.086162	-0.130853	-0.243271	-0.118021	0.059987	0.068798	0.059265	0.07747	-0.057332	-0.504076	-0.499783	-0.504249	-0.537114	-0.507991	-0.25019	-0.303539	-0.411098	-0.286393	-0.173383	-0.183899	-0.204104	-0.168786	-0.206829	-0.300342	-0.309526	-0.314128	-0.349673	-0.332073	-0.067448	-0.114671	-0.231362	-0.10618	0.061941	0.084997	0.060544	0.091952	0.054048	-0.243871
28	FcC≡CH	0	1	2	2.34		2.12743	2.16823	2.12801	2.22085	2.18259	2.97743	3.09431	2.50717	3.00998	2.93315	3.10423	3.28428	3.25929	4.02912	1.7351	1.78607	1.75757	1.82091	1.82134	2.57851	2.66824	2.13439	2.61871	2.54078	2.64332	2.83549	2.80978	3.5764	2.25431	2.29066	2.24734	2.35027	2.29513	3.13579	3.2646	2.63521	3.161	3.03102	3.27556	3.46277	3.42095	4.23393	2.70878
29	FcCN	0	1	2	2.36		2.11692	2.15676	2.11644	2.20862	2.16899	2.96008	3.07645	2.49133	2.9914	2.9167	3.08728	3.2659	3.24085	4.00813	1.72569	1.77556	1.74709	1.80986	1.80909	2.56253	2.65164	2.1199	2.60159	2.52575	2.62754	2.81845	2.7928	3.55706	2.24255	2.27785	2.23451	2.33664	2.28056	3.11752	3.24575	2.61843	3.14161	3.01319	3.25748	3.44333	3.40122	4.21234	2.69283
30	Fc(COMe)	0	1	2	2.27		1.98249	2.01941	1.97915	2.07171	2.03167	2.83854	2.95843	2.35947	2.87198	2.80926	2.97186	3.15452	3.13413	3.91972	1.59061	1.63818	1.60991	1.67241	1.67197	2.43839	2.53022	1.98707	2.47966	2.41697	2.50776	2.70273	2.68221	3.46294	2.09918	2.13263	2.08975	2.19164	2.13657	2.98688	3.11807	2.47912	3.01398	2.89463	3.13159	3.32201	3.28427	4.11442	2.5524
31	Fc(COMe)2	0	1	2	2.27		1.89334	1.92808	1.887	1.98049	1.94028	2.78467	2.90573	2.28422	2.81824	2.75521	2.9387	3.11679	3.10278	3.88764	1.5101	1.55459	1.52575	1.58956	1.58863	2.3908	2.4846	1.9191	2.43222	2.36952	2.47983	2.67133	2.65662	3.43701	2.00644	2.03735	1.9932	2.09572	2.04151	2.93259	3.0654	2.4018	2.95992	2.84043	3.09877	3.28451	3.25372	4.0839	2.47529
32	Fc(CO2Me)	0	1	2	2.3		2.01581	2.05352	2.01347	2.10552	2.06551	2.85911	2.97773	2.38778	2.89223	2.8278	2.9868	3.16904	3.14632	3.9262	1.61914	1.66766	1.63967	1.70149	1.70166	2.45552	2.546	2.01181	2.49662	2.4316	2.51947	2.71409	2.69114	3.467	2.13259	2.16719	2.12442	2.22614	2.17093	3.00735	3.13731	2.50773	3.03381	2.91246	3.1464	3.33629	3.29583	4.12041	2.581
33	Fc(CO2Me)2	0	1	2	2.34		1.93616	1.97283	1.93226	2.02494	1.98405	2.80717	2.92673	2.31855	2.83871	2.77328	2.95426	3.13058	3.11396	3.88894	1.55002	1.59722	1.56861	1.63157	1.63025	2.41297	2.50486	1.95231	2.45294	2.38764	2.49609	2.68509	2.66832	3.43946	2.0503	2.08356	2.03976	2.14129	2.08628	2.95507	3.08587	2.43674	2.98064	2.85867	3.11425	3.29826	3.26489	4.08472	2.51071
34	[{Fe-NO}7(pyS4)]	0	2	2	0.4		-0.365388	-0.33595	-0.344473	-0.31464	-0.306606	0.30445	0.305527	0.272293	0.294699	0.439846	0.390255	0.365969	0.395053	0.487804	-0.381956	-0.353017	-0.362577	-0.328862	-0.32885	0.320674	0.317201	-0.295246	0.315484	0.472138	0.395132	0.374105	0.402421	0.491164	-0.350811	-0.317243	-0.32617	-0.296842	-0.283055	0.270354	0.276501	-0.2429	0.257523	0.389374	0.356537	0.333003	0.360202	0.453816	0.263099
35	[Fe(OEP)]	0	3	2	1.71		1.98558	1.47256	1.49249	0.88872	1.50298	1.31058	1.13139	1.33109	1.13238	-2.76974	1.55174	1.2742	1.10679	-0.992155	2.37714	1.92582	1.90581	1.25018	1.77547	0.762737	1.35839	1.58042	0.780913	-2.8268	1.04942	0.812251	0.857007	1.16104	2.24652	1.75823	1.74288	1.1153	1.55194	0.603629	0.592862	1.33198	1.10794	-2.95654	1.53122	1.24381	1.05212	-0.936087	1.32449
36	[Fe(TPP)]	0	3	2	1.51		2.47315	1.87519	1.8478	1.56526	1.58384	1.35839	1.17439	1.38299	1.17879	-3.08691	1.59453	1.31518	1.14458	-1.02469	2.6847	2.08394	2.06175	1.78662	1.82409	1.58051	1.4004	1.63173	1.41873	-3.05296	1.84418	1.54489	1.37743	1.195	2.5116	1.88577	1.86885	1.57448	1.60037	1.33865	1.14261	1.38159	1.15304	-3.02482	1.56958	1.28261	1.0868	-0.968354	1.36871
37	Fe(phen)2(NCS)2 (HS)	0	5	2	2.82		-1.92861	-2.16319	-2.11318	-2.17433	-2.3323	-3.2215	-3.30594	-2.81808	-3.31343	-2.7401	-3.46491	-3.51093	-3.54266	-3.66024	-1.84496	-2.07572	-2.02572	-2.08428	-2.24334	-3.04483	-3.12583	-2.69105	-3.14162	-2.51534	-3.25405	-3.30801	-3.3251	-3.45246	-2.02336	-2.26935	-2.21798	-2.2895	-2.44246	-3.33712	-3.43567	-2.93357	-3.42344	-2.83009	-3.59594	-3.64009	-3.66983	-3.78051	-2.84204
38	Fe(cis-phen)2Cl2	0	5	2	3.26		-1.68019	-1.86871	-1.81965	-1.89527	-2.01453	-2.99028	-3.11728	-2.45916	-3.16411	-2.36375	-3.4236	-3.47831	-3.55184	3.71535	-1.56429	-1.74964	-1.69769	-1.76919	-1.89734	-2.77735	-2.90056	-2.31015	-2.95771	-2.11223	-3.17006	-3.23172	-3.29253	-3.46151	-1.78217	-1.97863	-1.92972	-2.02065	-2.12845	-3.10964	-3.25755	-2.58367	-3.27729	-2.46283	-3.55215	-3.60504	-3.67167	-3.82905	-2.48236
39	[Fe(LN4)(NCS)2] (HS)	0	5	2	2.512		-1.99261	2.15858	2.12196	2.17577	2.26896	2.79628	2.86968	2.57714	2.83725	2.42924	2.93967	2.96118	2.96473	3.01958	-1.85949	2.0237	1.9844	2.03861	2.1416	2.62472	2.70428	2.43292	2.68598	2.15013	2.76711	2.79645	2.79223	2.86069	-2.13143	2.29963	2.26517	2.32123	2.40453	2.92081	2.99418	2.70601	2.94277	2.5671	3.06288	3.07625	3.07544	3.11032	2.69194
40	[FeS4C8O4]2–	-2	5	2	4.01		-3.51056	3.50339	3.48579	-3.55182	3.56488	-4.06621	-4.14266	-3.96673	-4.07228	-3.90182	-4.18186	-4.22644	-4.2197	-4.33098	3.20638	3.45195	-3.52973	3.31872	3.26582	3.80462	-3.94463	3.54174	3.80422	-3.73497	-4.04358	-4.06292	-4.05877	-4.16575	3.45734	3.49937	3.6772	3.58318	-3.84798	4.09587	-4.24923	-4.14102	-4.36415	-4.10372	-4.38255	-4.38711	-4.40471	-4.48537	3.93728
41	[Fe(SPh)4]2–	-2	5	2	3.24		-2.55619	2.67898	2.66545	2.68071	2.74093	3.26559	3.3081	3.02406	3.29855	3.05364	3.31835	3.40084	3.41983	3.57567	2.4255	2.55052	2.53103	2.55223	2.60636	3.08346	3.12921	2.86988	3.12294	2.76851	3.12819	3.21066	3.21617	3.37033	-2.69761	2.81617	2.79951	2.82118	2.86341	3.40537	3.4588	3.15285	3.42811	3.19048	3.47877	3.55485	3.57575	3.71435	3.1452
42	[Ba(18-crown-6)(H2O(OH)][Fe(NCS)4]	-2	5	2	2.83		2.71807	3.09009	3.0692	2.85893	3.13591	3.54328	3.3228	3.37094	3.55647	-3.49079	3.66092	3.66828	3.67224	3.45746	2.50244	2.6331	2.60628	2.64417	2.68621	3.01149	3.0714	2.88568	3.04311	2.63715	3.10185	3.13301	3.12283	3.19379	2.83168	2.96018	2.93766	2.9778	2.9997	3.38059	3.44639	3.21921	3.39176	3.13307	3.5005	3.52148	3.5185	3.57208	3.23986
43	[Fe(SR)3]-; R=C6H2-2,4,6-tBu3	-1	5	2	0.83		-1.34711	-1.27011	-1.26619	-1.2911	-1.16494	-1.27875	-1.29571	-1.20277	-1.23569	-1.22503	-1.17118	-1.22874	-1.15419	-1.19551	-1.17081	-1.10106	-1.09378	-1.12106	-0.993849	-1.07989	-1.10142	-1.02077	-1.03932	-1.03709	-0.966212	-1.02548	-0.94728	-0.989688	-1.29867	-1.20513	-1.2011	-1.22996	-1.08129	-1.21555	-1.23911	-1.12561	-1.16108	-1.11528	-1.11155	-1.17012	-1.07981	-1.12553	-1.23122
44	Na[Fe(CH3CO2)TPpivP]	-1	5	2	4.25		2.50281	2.60228	2.50744	2.62267	2.64354	4.35467	4.49261	3.17477	4.51016	2.50781	4.72189	4.76351	4.77467	4.84474	2.37117	2.4676	2.37289	2.48114	2.51849	4.10514	4.24558	3.01332	4.29034	2.23796	4.47441	4.52715	4.53856	4.61639	2.56582	2.67732	2.57751	2.70429	2.71383	4.43122	4.58896	3.23915	4.60546	2.54193	4.84122	4.89383	4.91349	4.97657	3.13665
45	MeLMe,Me2Fe	0	5	2	1.8		1.13172	1.29609	1.2596	1.29486	1.36934	1.84831	1.89146	1.64471	1.88108	1.61625	1.89574	1.9612	1.95996	2.07053	0.97027	1.13408	1.09496	1.13483	1.2046	1.63636	1.685	1.45897	1.67519	1.30383	1.66807	1.74056	1.72706	1.84811	1.21845	1.37988	1.33988	1.37902	1.44009	1.93308	1.98288	1.7195	1.95559	1.7089	1.9894	2.05364	2.04977	2.15206	1.70015
46	[Fe(bipy)3](ClO4)3	3	2	3	1.76		2.09877	2.05811	2.05924	2.04301	1.93658	2.05009	2.03852	1.94993	1.92007	2.58615	2.24277	2.10668	2.12088	1.89362	2.0533	2.02396	2.02143	2.00758	1.91578	2.01265	2.00101	1.92736	1.8983	2.51368	2.19696	2.0667	2.06654	1.86284	2.20242	2.1564	2.15903	2.14527	2.02031	2.14728	2.13792	2.03356	2.00372	2.70247	2.35444	2.2104	2.23585	1.98486	2.17786
47	[Fe(phen)3](ClO4)3	3	2	3	1.67		2.18445	2.14493	2.14549	2.1257	2.01271	2.15537	2.13987	2.03517	2.0092	2.73554	2.35616	2.21269	2.22878	1.98616	2.12744	2.09971	2.09629	2.07964	1.9807	2.10509	2.09037	2.00094	1.97532	2.64151	2.29726	2.16067	2.16014	1.94308	2.29688	2.2513	2.25325	2.23548	2.10244	2.26024	2.24649	2.12501	2.09844	2.85936	2.4773	2.3243	2.35161	2.08291	2.28269
48	[Fe(terpy)2](ClO4)3	3	2	3	3.32		-3.27874	-3.27752	-3.26842	-3.25047	-2.89875	-3.24533	-3.18805	-2.88715	-2.81669	-4.01861	-3.5373	-3.29286	-3.32068	-2.84748	-3.19509	-3.19994	-3.18689	-3.17127	-2.81723	-3.147	-3.09604	-2.80223	-2.73361	-3.79485	-3.43463	-3.19908	-3.20887	-2.76209	-3.36008	-3.33511	-3.32543	-3.30994	-2.91281	-3.2925	-3.2423	-2.90375	-2.83764	-4.14501	-3.61643	-3.35766	-3.40018	-2.88771	-3.35129
49	[Fe-trans-(cyclam)(N3)2]PF6	1	2	3	2.241		-1.8921	-1.80297	-1.80173	-1.76894	-1.67127	-1.90602	-1.88504	-1.72618	-1.76113	-2.41883	-2.04767	-1.96299	-1.98899	-1.82218	-1.82923	-1.75352	-1.74913	-1.71928	-1.62879	-1.84694	-1.82754	-1.6803	-1.71172	-2.29677	-1.98018	-1.9016	-1.91088	-1.76477	-2.0046	-1.91111	-1.91139	-1.87648	-1.76535	-2.0195	-1.99804	-1.82491	-1.85869	-2.58911	-2.17461	-2.08283	-2.11719	-1.92644	-1.9502
50	Fe(OEPPY)	1	2	3	2.15		-2.19835	-2.17336	-2.17382	-2.18107	-2.00985	-2.19609	-2.21128	-2.03069	-2.00166	-3.12827	-2.40146	-2.28508	-2.31547	-2.04023	-2.16675	-2.15464	-2.15031	-2.16391	-1.99255	-2.16057	-2.182	-2.00785	-1.97359	-2.94016	-2.36536	-2.2528	-2.26273	-2.00436	-2.31955	-2.28259	-2.28466	-2.28917	-2.09779	-2.30078	-2.31519	-2.11728	-2.08258	-3.29755	-2.52789	-2.39642	-2.43824	-2.12075	-2.33795
51	[Fe(acpa)2]PF6 (LS)	1	2	3	2.24		1.99462	2.01398	2.01547	1.99211	1.94702	2.29967	2.26821	2.07524	2.17522	2.7478	2.41119	2.3565	2.38192	2.25114	1.9314	1.96019	1.95949	1.93654	1.89804	2.22588	2.1957	2.01981	2.11056	2.61182	2.32884	2.28048	2.28991	2.17981	2.07753	2.10037	2.10249	2.07772	2.02102	2.3996	2.36896	2.15728	2.25412	2.87866	2.51887	2.462	2.49705	2.33934	2.24097
52	Fe(thpu)(Hthpu) (LS)	0	2	3	3.09		-2.82298	-2.90064	-2.88333	-2.91762	-2.92904	-3.49666	-3.53507	-3.19439	-3.38718	-3.38215	-3.59694	-3.64077	-3.6691	-3.49172	-2.78499	-2.86905	-2.84899	-2.88453	-2.89242	-3.41247	-3.45047	-3.13556	-3.28775	-3.19729	-3.50777	-3.54752	-3.55484	-3.34659	-2.90655	-2.97752	-2.95942	-2.99955	-2.98705	-3.58195	-3.62501	-3.25401	-3.42324	-3.49967	-3.69682	-3.73612	-3.76939	-3.51462	-3.31615
53	[(TIMMN_Mes)Fe(NAd)]+	1	2	3	2.54		2.19017	2.16284	2.14922	2.17198	2.05913	2.22724	2.28177	2.11816	1.87528	2.94548	2.83597	2.44723	2.57681	1.57122	1.90471	1.88583	1.87104	1.88797	1.79146	1.94336	1.99075	1.84224	1.60336	2.56182	2.50642	2.14535	2.25407	1.32113	2.38076	2.34716	2.33437	2.35375	2.22345	2.42039	2.47347	2.28546	2.02759	3.12319	3.06837	2.6576	2.8071	1.72093	2.51268
54	[Cp*2Fe]+	1	2	3	0		-0.272224	-0.25548	-0.274593	-0.237616	-0.194586	0.258687	0.302097	-0.02102	0.319192	5.9959	0.329915	0.421898	0.415802	0.845179	-0.520648	-0.504288	-0.510362	-0.501969	-0.427848	-0.018977	0.030597	-0.229664	0.0715	5.37117	0.034787	0.132167	0.158989	0.561355	-0.31082	-0.288087	-0.311244	-0.272443	-0.225406	0.259171	0.30427	-0.01855	0.321916	6.29894	0.326851	0.429322	0.404088	0.880546	-0.048157
55	Fe(mnt)2(idzm)	0	4	3	2.64		2.32788	2.41104	2.41235	2.38769	2.38034	3.37549	3.34225	2.7605	3.36715	3.26516	3.38799	3.57493	3.66476	4.14478	2.33979	2.41787	2.41575	2.39061	2.38924	3.31132	3.27734	2.74329	3.31231	3.11078	3.33422	3.5018	3.5863	4.01599	2.38623	2.46787	2.46946	2.45013	2.4208	3.45723	3.43354	2.81268	3.43612	3.39136	3.46453	3.66352	3.75814	4.23714	2.82525
56	[Fe(η4-MAC*)Cl]2−	-2	4	3	3.6		3.02757	3.05997	3.05477	3.02027	3.02158	3.42889	3.40281	3.20047	3.39594	3.27381	3.54698	3.52618	3.56949	3.55723	3.03674	3.06474	3.05659	3.0218	3.02985	3.39301	3.36384	3.19344	3.36778	3.126	3.51982	3.48547	3.52138	3.48369	3.13621	3.16543	3.16422	3.13259	3.11425	3.52288	3.50385	3.29027	3.47721	3.42587	3.6557	3.62556	3.66536	3.6308	3.3113
57	Fe(S-t-Bu)3NO	-1	4	3	0.46		-0.356265	-0.413119	-0.418825	-0.417176	-0.467391	-0.607467	-0.594026	-0.530463	-0.643015	-0.608627	-0.445025	-0.577886	-0.591965	-0.782481	-0.406428	-0.453275	-0.458368	-0.460191	-0.500045	-0.618283	-0.607874	-0.550971	-0.648637	-0.61388	-0.47233	-0.592001	-0.595459	-0.774944	-0.37522	-0.429006	-0.433386	-0.434273	-0.479505	-0.621838	-0.612722	-0.543465	-0.652774	-0.650831	-0.4678	-0.596613	-0.612256	-0.791171	-0.498494
58	[Fe(SEt)4]−	-1	6	3	0.62		-0.815631	-0.779459	-0.776185	-0.779869	-0.720096	-0.671194	-0.674835	-0.682851	-0.635954	-0.73174	-0.735553	-0.679424	-0.668285	-0.587533	-0.85336	-0.823316	-0.817429	-0.824675	-0.766501	-0.708777	-0.715291	-0.727207	-0.67746	-0.745121	-0.779996	-0.720983	-0.706793	-0.625566	-0.83351	-0.789633	-0.787364	-0.791273	-0.724145	-0.665564	-0.669649	-0.680762	-0.627573	-0.721508	-0.740721	-0.67536	-0.664118	-0.573703	-0.747848
59	Fe(NO)2(S(p-Me)Ph)2−	-1	6	3	0.69		-0.674722	-0.846016	-0.841659	-0.819681	-0.972768	-0.930983	-0.890646	-1.18783	-0.953873	-0.938378	-1.2199	-0.893501	-0.92327	-1.15029	-0.767701	-0.924465	-0.921117	-0.905523	-1.04008	-0.975742	-0.940956	-1.23478	-0.994217	-0.963536	-1.26901	-0.941767	0.960945	-1.17543	-0.686445	-0.859787	-0.855056	-0.83555	-0.983626	-0.949263	-0.912672	-1.20852	-0.971348	-0.983502	-1.26225	-0.919983	-0.951159	-1.17382	-1.09363
60	[Fe(C33H37N4)Cl]	0	6	3	1.36		-0.433313	-0.435992	-0.442261	-0.421529	-0.47792	0.621957	0.608168	-0.550778	0.645535	0.550916	0.635694	0.655011	0.662837	0.744118	-0.496748	-0.498477	-0.502896	-0.486382	-0.537505	0.669858	0.660479	0.606189	0.692696	0.571056	0.694182	0.70666	0.706699	0.778073	-0.421487	-0.424937	-0.43337	-0.410279	-0.470836	0.614913	0.600247	-0.545205	0.639367	-0.537976	0.629795	0.647776	0.650377	0.731151	-0.48921
61	[Fe(porphyrin)(OCOCH3)]	0	6	3	1.1		-0.110457	-0.099314	-0.103019	-0.095237	-0.114217	0.269186	0.240317	0.179421	0.278609	0.205022	0.248242	0.281224	0.280493	0.39603	-0.147979	-0.132878	-0.141217	-0.115524	0.156703	0.315862	0.29012	0.22876	0.324221	0.234714	0.302419	0.330959	0.326728	0.427038	-0.109284	-0.101759	-0.102812	0.10628	-0.110203	0.255976	0.2238	-0.169527	0.267098	-0.187279	0.229416	0.263396	0.261632	0.373254	-0.1297
62	Fe(acac)3	0	6	3	0.64		0.746849	0.711008	0.711058	0.715622	0.677886	0.576127	0.572931	0.6272	0.558796	0.57355	0.613874	0.563922	0.554637	0.454867	0.791978	0.764732	0.762096	0.770582	0.738315	0.635149	0.635791	0.689734	0.623985	0.603037	0.675318	0.628107	0.615225	0.523968	0.739204	0.701839	0.704066	0.71011	0.669546	0.569009	0.566592	0.619058	0.551888	0.560254	0.607072	0.557534	0.547728	0.451869	0.649287
63	Fe(tfa)3	0	6	3	0.67		0.769866	0.739071	0.738049	0.74323	0.711624	0.619437	0.616853	0.667302	0.604639	0.61491	0.658393	0.6102	0.600462	0.505842	0.81621	0.793179	0.789606	0.798854	0.771595	0.674669	0.675829	0.727714	0.665585	0.640675	0.716565	0.669911	0.656598	0.567281	0.764816	0.732248	0.733648	0.740259	0.705566	0.61377	0.612029	0.66094	0.599059	0.603613	0.653345	0.605242	0.594889	0.504074	0.687621
64	[Fe(phen)2Cl2]+	1	6	3	0.05		-0.590147	-0.610288	-0.61244	-0.602332	-0.596436	-0.676196	-0.671981	-0.629677	-0.654756	-0.680975	-0.688752	-0.690488	-0.70161	-0.659126	-0.556022	-0.578325	-0.581615	-0.568928	-0.567901	-0.646607	-0.639263	-0.601838	-0.627893	-0.6409	-0.652702	-0.656304	-0.670884	-0.63133	-0.606093	-0.629186	-0.631061	-0.62161	-0.611317	-0.695434	-0.692823	-0.645816	-0.670637	-0.711097	-0.706166	-0.709703	-0.725164	-0.67799	-0.6624
65	PcFeCl	0	6	3	2.56		0.511587	0.467989	0.477653	0.460123	0.488796	0.545441	0.532909	0.506703	0.570875	0.492877	1.2988	0.557426	1.26991	0.661201	0.564057	0.522339	0.528687	0.517179	0.537813	0.590699	0.583195	0.555179	0.613396	0.513183	1.27965	0.607735	1.23612	0.694153	0.500133	0.45473	0.466049	0.447643	0.478728	0.535481	0.521981	0.498231	0.562034	0.475923	1.32522	0.546754	0.534283	0.645626	0.448719
66	MeLMe,MeFeCl2	0	6	3	1.23		-1.01615	-1.02502	-1.02004	-1.03005	-1.02777	-1.02466	-1.04054	-1.03873	-1.02183	-0.991193	-1.06506	-1.04588	-1.03473	-0.956253	-0.978225	-0.986979	-0.981936	-0.987492	-0.996632	-0.989441	-0.998719	-1.00718	-0.992589	-0.930388	-1.02152	-1.00481	-0.996419	-0.927237	-1.08496	-1.09168	-1.08786	-1.10022	-1.09412	-1.08195	-1.10101	-1.10125	-1.07804	-1.04474	-1.1322	-1.1065	-1.0954	-1.01009	-1.11488
67	[Cp*2Fe(CO)]2+	2	1	4	3.22		-3.13043	-3.10579	-3.09356	-3.11886	-3.00793	-3.45632	-3.43982	-3.15253	-3.34573	-3.57284	-3.4864	-3.51523	-3.53594	-3.60325	-2.78315	-2.77231	-2.76684	-2.77027	-2.68899	-3.12944	-3.09414	-2.83184	-3.02486	-3.18496	-3.11607	-3.15913	-3.18849	-3.27126	-3.3238	-3.29271	-3.27715	-3.30823	-3.17187	-3.67584	-3.66211	-3.33166	-3.54612	-3.77874	-3.71172	-3.74477	-3.75555	-3.84486	-3.46394
68	[(TIMMN_Mes)Fe(NAd)]2+	2	1	4	3.54		3.71411	3.72986	3.72053	3.72875	3.62064	4.26427	4.22902	3.83876	4.10549	4.85493	4.57593	4.48605	4.59418	4.51325	3.3914	3.42201	3.41454	3.40868	3.32159	3.94607	3.89857	3.53397	3.7944	4.42695	4.21002	4.13804	4.23267	4.18237	3.95851	3.97007	3.96099	3.96756	3.83781	4.54552	4.50428	4.07291	4.36131	5.1075	4.87223	4.77836	4.90303	4.80767	4.2162
69	[(N3N′)Fe(CN)]	0	1	4	3.22		-2.95075	-2.97088	-2.97601	-2.96531	-2.88726	-3.52415	-3.49424	-3.10256	-3.4059	-3.86396	-3.66035	-3.68417	-3.80803	-3.97563	-2.77502	-2.80874	-2.80924	-2.80276	-2.72949	-3.33165	-3.30696	-2.93387	-3.22256	-3.49683	-3.44834	-3.481	-3.57881	-3.76582	-3.10229	-3.1171	-3.12235	-3.1141	-3.01817	-3.71157	-3.68248	-3.24971	-3.57476	-4.06239	-3.86176	-3.88644	-4.0189	-4.19151	-3.35475
70	Fe(PPh3)2(“S2”)2	0	3	4	1.52		1.31757	1.42634	1.42391	1.46752	1.45509	2.09604	2.10157	1.69747	2.11682	2.04598	1.87164	2.22089	2.26788	-2.23995	1.27776	1.38889	1.38386	1.42981	1.41096	2.01749	2.02852	1.64064	2.03478	1.88657	1.79619	2.13603	2.17057	-2.09904	1.37389	1.48906	1.48514	1.53145	1.5084	2.19569	2.20433	1.76579	2.20758	2.15434	1.957	2.32851	2.37745	-2.35421	1.7792
71	Fe(PPh3)(“S2”)2	0	3	4	3.03		2.8203	2.88863	2.89311	2.91127	2.90079	3.48233	3.47977	3.12663	3.46877	3.32584	3.68133	3.73392	3.89555	3.98581	2.79765	2.86921	2.87299	2.8842	2.88114	3.42955	3.42041	3.09516	3.41892	3.17825	3.61552	3.66453	3.81762	3.88048	2.89308	2.963	2.96703	2.98789	2.96685	3.58762	3.58707	3.20367	3.56667	3.45189	3.78438	3.84795	4.01719	4.11293	3.23484
72	[Fe(N4Py)(O)](ClO4)2	2	3	4	0.93		0.299374	0.345042	0.330974	0.370237	0.362992	0.739872	0.760711	0.538452	-2.06197	0.548656	0.716003	0.786902	0.794866	-2.10839	0.150481	0.197903	0.184674	0.220292	0.218622	0.581897	0.599358	0.38717	0.575257	0.317318	0.540316	0.620358	0.630242	-2.36446	0.407216	0.466915	0.454778	0.491202	0.483373	0.8951	0.910384	0.670887	0.879113	0.695691	0.853915	0.937748	0.945798	-1.52602	0.692967
73	[Fe(O)(TMC)(NCCH3)]2+	2	3	4	1.24		0.930619	0.89679	0.880711	0.860371	0.837126	1.71569	-1.82804	0.847798	-1.97156	-1.65574	0.774282	1.57967	0.756915	-2.42372	0.792839	0.774684	0.756094	0.738052	0.724758	1.70125	-1.76708	0.739361	1.82549	0.488436	0.659029	1.55862	0.648701	1.9675	1.06489	1.04129	1.02929	0.998986	0.97643	1.06546	1.94972	0.994127	-2.22252	-1.8249	0.917634	1.80442	0.910161	-2.58104	1.00538
74	[Cp*2Fe]2+ (linear)	2	3	4	2		1.64515	1.93036	1.90338	1.92845	2.03754	2.57379	2.6247	2.31476	2.64341	2.2147	2.68947	2.77801	2.79233	3.07664	1.30967	1.55577	1.53653	1.54351	1.65694	2.17441	2.20368	1.92122	2.24075	1.7783	2.2476	2.3428	2.36814	2.64632	1.84792	2.1369	2.10593	2.13295	2.2278	2.78225	2.83221	2.50843	2.84463	2.42853	2.90925	2.99338	3.00067	3.28484	2.47944
75	[Fe(O)(porphyrin)]+	1	4	4	1.62		1.16916	1.59359	1.47621	1.7913	2.20657	2.31024	2.2871	2.22453	2.28551	2.02431	2.29288	2.30455	2.27651	2.13903	1.1707	1.57497	1.45509	1.75534	2.16954	2.26722	2.23855	2.18817	2.24924	1.8686	2.24906	2.25924	2.23318	2.08265	1.23511	1.6967	1.57091	1.91191	2.34564	2.47778	2.44445	2.37149	2.4469	2.21559	2.44367	2.4644	2.43992	2.27338	2.38675
76	[Fe(η4-MAC*)Cl]−	-1	5	4	0.89		-0.835956	-0.820687	-0.821637	-0.802484	-0.804749	-0.935086	-0.888296	-0.842692	-0.935138	-0.971521	-0.92502	-0.907193	-0.913422	1.34479	-0.894449	-0.85932	-0.863822	-0.830235	-0.842823	-1.00651	-0.945739	-0.888156	-1.01327	-1.01561	-0.953842	-0.967342	-0.97585	1.41766	-0.858443	-0.850281	-0.850155	-0.839472	-0.833584	-0.934664	-0.898099	-0.862897	-0.929809	-0.992437	-0.955999	-0.915748	-0.919745	1.32181	-0.888041
77	[Fe(B*)(O)]-	-1	2	5	4.25		3.94043	3.94125	3.94672	3.94258	3.8647	4.48809	4.47259	4.09134	4.39353	4.44119	4.87381	4.78425	4.97266	4.27479	3.75339	3.77162	3.7757	3.76894	3.69863	4.297	4.28017	3.91631	4.20857	4.07097	4.65083	4.57331	4.74139	4.10599	4.13842	4.13732	4.14737	4.14001	4.04223	4.71688	4.69854	4.28216	4.60332	4.66985	5.10586	5.0203	5.21721	4.4657	4.37515
78	[Fe(cyclam-acetate)(N)]PF6	1	2	5	1.6		1.57512	1.58433	1.57776	1.56192	1.56358	1.4573	1.47017	1.63136	1.46787	1.60161	1.7038	1.95082	1.97086	1.96489	1.51789	1.53158	1.52538	1.51222	1.51121	1.40706	1.4224	1.57523	1.42169	2.01226	1.64491	1.88596	1.89883	1.90445	1.65194	1.64969	1.64355	1.62394	1.61312	1.49787	1.5087	1.68602	1.49779	1.61372	1.76847	2.01677	2.04035	2.39373	1.66746
79	[Fe(Me3cyclam-acetate)(N)](PF6)2	2	1	6	1.53		0.559597	0.552256	0.555524	0.528906	0.505574	0.646859	0.600422	0.552738	0.582619	0.611997	0.537856	0.57045	0.567945	0.461457	-0.420462	-0.427167	-0.429404	-0.408786	-0.397872	0.510474	0.469409	-0.432756	0.461164	-0.402938	-0.411413	0.443609	0.439366	-0.371156	0.768945	0.765424	0.77361	0.732256	0.700788	0.889673	0.825618	0.763243	0.805279	0.843355	0.762346	0.798686	0.80517	0.673449	0.793398
80	[(TIMMN_Mes)Fe(N)(F)]3+	3	2	7	3.2		3.70588	3.7625	3.75694	3.79231	3.76672	4.43617	4.45048	4.04632	4.40707	4.2893	4.58017	4.62725	4.73093	4.58881	3.44111	3.50507	3.50252	3.521	3.51638	4.16546	4.16589	3.79445	4.14424	3.88845	4.24844	4.3352	4.40879	4.29955	3.98992	4.0562	4.05379	4.0872	4.04181	4.75906	4.77402	4.34014	4.71369	4.61767	4.87144	4.95777	5.07437	4.89024	4.39619
[truncated: 22 more columns]
