# Supplementary material for: Extensive reference set and refined computational protocol for calculations of 57Fe Mössbauer parameters
Source: Royal Society of Chemistry journal article supplement (doi:10.1039/d4cp00431k), 2024-01-01
Supplement: d4cp00431k3.pdf [file d4cp00431k3.pdf]

## Electronic Supplementary Information

# **Extensive Reference Set and Refined Computational Protocol for Calculations of $^{57}\text{Fe}$ Mössbauer Parameters**

Golokesh Santra, Frank Neese, Dimitrios A. Pantazis

Max-Planck-Institut für Kohlenforschung, Kaiser-Wilhelm-Platz 1, 45470 Mülheim an der Ruhr, Germany

**Table S1:** Molecular Iron Complexes present in the MPMIC80 dataset.

|    | Complex <sup>[a]</sup>                                                                        | 2S+1 <sup>[b]</sup> | Fe ox. | $\delta_{\text{exp}}$<br>(mm s <sup>-1</sup> ) | $ \Delta E_Q _{\text{exp}}$<br>(mm s <sup>-1</sup> ) | T<br>(K) | Refs.  |
|----|-----------------------------------------------------------------------------------------------|---------------------|--------|------------------------------------------------|------------------------------------------------------|----------|--------|
| 1  | [Fe(CO) <sub>4</sub> H] <sup>-</sup>                                                          | 1                   | 0      | -0.17                                          | 1.36                                                 | 77       | 1      |
| 2  | [Fe(CO) <sub>5</sub> ]                                                                        | 1                   | 0      | -0.18                                          | 2.57                                                 | 4.2      | 2, 3   |
| 3  | [Fe( $\eta$ 4-butadiene)(CO) <sub>3</sub> ]                                                   | 1                   | 0      | 0.12                                           | 1.34                                                 | 78       | 4      |
| 4  | Fe(CO) <sub>3</sub> (cyclo-butadiene)                                                         | 1                   | 0      | 0.02                                           | 1.52                                                 | 78       | 5      |
| 5  | ( <sup>Me</sup> L <sup>Me,Me</sup> )Fe(CNXY) <sub>3</sub>                                     | 2                   | 1      | 0.17                                           | 0.81                                                 | 80       | 6      |
| 6  | L <sup>Me</sup> Fe( $\eta$ <sup>6</sup> -C <sub>6</sub> H <sub>6</sub> )                      | 2                   | 1      | 0.70                                           | 0.74                                                 | 80       | 6      |
| 7  | ( <sup>Me</sup> L <sup>Me,Me</sup> )Fe(CO) <sub>3</sub>                                       | 2                   | 1      | 0.12                                           | 0.77                                                 | 80       | 6      |
| 8  | Fe(phen) <sub>2</sub> (NCS) <sub>2</sub> (LS)                                                 | 1                   | 2      | 0.34                                           | 0.34                                                 | 77       | 7, 8   |
| 9  | Fe(LN <sub>4</sub> )(NCS) <sub>2</sub> (LS)                                                   | 1                   | 2      | 0.44                                           | 0.77                                                 | 80       | 9      |
| 10 | Fc (Ferrocene)                                                                                | 1                   | 2      | 0.53                                           | 2.40                                                 | 80       | 10     |
| 11 | [Fe(pyS <sub>4</sub> )(PH <sub>3</sub> )]                                                     | 1                   | 2      | 0.34                                           | 0.69                                                 | 80       | 11     |
| 12 | [Fe(pyS <sub>4</sub> )(CO)]                                                                   | 1                   | 2      | 0.19                                           | 0.88                                                 | 80       | 11     |
| 13 | CpFe(CO) <sub>2</sub> Cl                                                                      | 1                   | 2      | 0.27                                           | 1.82                                                 | 4.2      | 12     |
| 14 | [Fe(OEP)(CO)]                                                                                 | 1                   | 2      | 0.27                                           | 1.84                                                 | 4.2      | 13     |
| 15 | [Fe(PyO)I(CO) <sub>2</sub> PPh <sub>3</sub> ]                                                 | 1                   | 2      | 0.10                                           | 0.48                                                 | 55       | 14     |
| 16 | [Fe(PyS)I(CO) <sub>2</sub> PPh <sub>3</sub> ]                                                 | 1                   | 2      | 0.10                                           | 0.35                                                 | 77       | 15     |
| 17 | CpFe(CO) <sub>2</sub> Me                                                                      | 1                   | 2      | 0.08                                           | 1.76                                                 | 78       | 16     |
| 18 | [{Fe-NO} <sup>6</sup> (pyS <sub>4</sub> ) <sup>+</sup>                                        | 1                   | 2      | 0.04                                           | 1.63                                                 | 80       | 11     |
| 19 | [CpFe(CO) <sub>3</sub> ] <sup>+</sup>                                                         | 1                   | 2      | 0.05                                           | 1.88                                                 | 78       | 10     |
| 20 | [Fe(bipy) <sub>3</sub> ] <sup>2+</sup>                                                        | 1                   | 2      | 0.33                                           | 0.39                                                 | 77       | 17     |
| 21 | [Fe(phen) <sub>3</sub> ] <sup>2+</sup>                                                        | 1                   | 2      | 0.34                                           | 0.23                                                 | 77       | 18     |
| 22 | {Fe[HC(3,5-Me <sub>2</sub> pz) <sub>3</sub> ] <sub>2</sub> } <sub>2</sub> I <sub>2</sub> (LS) | 1                   | 2      | 0.46                                           | 0.21                                                 | 4.2      | 19     |
| 23 | Fc(COOH) <sub>2</sub>                                                                         | 1                   | 2      | 0.48                                           | 2.16                                                 | 80       | 20     |
| 24 | [Fe(pyS <sub>4</sub> )(SMe <sub>3</sub> )]                                                    | 1                   | 2      | 0.44                                           | 0.43                                                 | 80       | 11     |
| 25 | PcFePy <sub>2</sub>                                                                           | 1                   | 2      | 0.32                                           | 1.96                                                 | 4.2      | 21     |
| 26 | [Fe(SC <sub>5</sub> H <sub>4</sub> NCO)I(CO) <sub>2</sub> (ArNC)]                             | 1                   | 2      | 0.01                                           | 0.29                                                 | 77       | 15     |
| 27 | [(TIMMN <sub>Mes</sub> )Fe(NAd)]                                                              | 1                   | 2      | -0.18                                          | 0.41                                                 | 80       | 22     |
| 28 | FcC $\equiv$ CH                                                                               | 1                   | 2      | 0.52                                           | 2.34                                                 | 80       | 23     |
| 29 | FcCN                                                                                          | 1                   | 2      | 0.52                                           | 2.36                                                 | 80       | 10     |
| 30 | Fc(COMe)                                                                                      | 1                   | 2      | 0.54                                           | 2.27                                                 | 80       | 20     |
| 31 | Fc(COMe) <sub>2</sub>                                                                         | 1                   | 2      | 0.49                                           | 2.27                                                 | 80       | 20     |
| 32 | Fc(CO <sub>2</sub> Me)                                                                        | 1                   | 2      | 0.53                                           | 2.30                                                 | 80       | 20     |
| 33 | Fc(CO <sub>2</sub> Me) <sub>2</sub>                                                           | 1                   | 2      | 0.54                                           | 2.34                                                 | 80       | 20     |
| 34 | [{Fe-NO} <sup>7</sup> (PyS <sub>4</sub> )]                                                    | 2                   | 2      | 0.33                                           | 0.40                                                 | 80       | 11     |
| 35 | [Fe(OEP)]                                                                                     | 3                   | 2      | 0.62                                           | 1.71                                                 | 4.2      | 24     |
| 36 | [Fe(TPP)]                                                                                     | 3                   | 2      | 0.52                                           | 1.51                                                 | 4.2      | 25, 26 |
| 37 | Fe(phen) <sub>2</sub> (NCS) <sub>2</sub> (HS)                                                 | 5                   | 2      | 1.01                                           | 2.82                                                 | 77       | 7, 8   |
| 38 | Fe(cis-phen) <sub>2</sub> Cl <sub>2</sub>                                                     | 5                   | 2      | 1.08                                           | 3.26                                                 | 80       | 27     |
| 39 | [Fe(LN <sub>4</sub> )(NCS) <sub>2</sub> ] (HS)                                                | 5                   | 2      | 1.11                                           | 2.51                                                 | 80       | 9      |
| 40 | [FeS <sub>4</sub> C <sub>8</sub> O <sub>4</sub> ] <sup>2-</sup>                               | 5                   | 2      | 0.67                                           | 4.01                                                 | 4.2      | 28     |
| 41 | [Fe(SPh) <sub>4</sub> ] <sup>2-</sup>                                                         | 5                   | 2      | 0.66                                           | 3.24                                                 | 4.2      | 28     |
| 42 | [Fe(NCS) <sub>4</sub> ] <sup>2-</sup>                                                         | 5                   | 2      | 0.97                                           | 2.83                                                 | 4.2      | 29     |
| 43 | [Fe(SR) <sub>3</sub> ] <sup>-</sup> ; R=C <sub>6</sub> H <sub>2</sub> -2,4,6-tBu <sub>3</sub> | 5                   | 2      | 0.56                                           | 0.83                                                 | 4.2      | 30, 31 |
| 44 | [Fe(CH <sub>3</sub> CO <sub>2</sub> )TPpivP] <sup>-</sup>                                     | 5                   | 2      | 1.05                                           | 4.25                                                 | 4.2      | 32     |
| 45 | ( <sup>Me</sup> L <sup>Me,Me</sup> ) <sub>2</sub> Fe                                          | 5                   | 2      | 0.84                                           | 1.80                                                 | 80       | 33     |
| 46 | [Fe(bipy) <sub>3</sub> ] <sup>3+</sup>                                                        | 2                   | 3      | 0.07                                           | 1.76                                                 | 77       | 34     |
| 47 | [Fe(phen) <sub>3</sub> ] <sup>3+</sup>                                                        | 2                   | 3      | 0.10                                           | 1.67                                                 | 77       | 18     |
| 48 | [Fe(terpy) <sub>2</sub> ] <sup>3+</sup>                                                       | 2                   | 3      | 0.08                                           | 3.32                                                 | 4.2      | 35, 36 |
| 49 | [Fe-trans-(cyclam)(N <sub>3</sub> ) <sub>2</sub> ] <sup>-</sup>                               | 2                   | 3      | 0.29                                           | 2.24                                                 | 80       | 37     |
| 50 | [Fe(OEP)(4-NMe <sub>2</sub> Py)] <sup>+</sup>                                                 | 2                   | 3      | 0.26                                           | 2.15                                                 | 4.2      | 38     |
| 51 | [Fe(acpa) <sub>2</sub> ] <sup>-</sup> (LS)                                                    | 2                   | 3      | 0.25                                           | 2.24                                                 | 78       | 39     |
| 52 | Fe(thpu)(Hthpu) (LS)                                                                          | 2                   | 3      | 0.28                                           | 3.09                                                 | 80       | 40     |
| 53 | [(TIMMN <sub>Mes</sub> )Fe(NAd)] <sup>+</sup>                                                 | 2                   | 3      | -0.12                                          | 2.54                                                 | 80       | 22     |
| 54 | [Cp* <sub>2</sub> Fe] <sup>+</sup>                                                            | 2                   | 3      | 0.57                                           | 0.00                                                 | 77       | 41     |
| 55 | Fe(mnt) <sub>2</sub> (idzm)                                                                   | 4                   | 3      | 0.36                                           | 2.64                                                 | 77       | 42     |
| 56 | [Fe( $\eta$ 4-MAC*)Cl] <sup>2-</sup>                                                          | 4                   | 3      | 0.25                                           | 3.60                                                 | 4.2      | 43     |

|    |                                                         |   |   |       |      |     |    |
|----|---------------------------------------------------------|---|---|-------|------|-----|----|
| 57 | [Fe(S-t-Bu) <sub>3</sub> NO] <sup>-</sup>               | 4 | 3 | 0.26  | 0.46 | 4.2 | 44 |
| 58 | [Fe(SEt) <sub>4</sub> ] <sup>-</sup>                    | 6 | 3 | 0.25  | 0.62 | 4.2 | 45 |
| 59 | [Fe(NO) <sub>2</sub> (S(p-Me)Ph)] <sup>2-</sup>         | 6 | 3 | 0.18  | 0.69 | 4.2 | 46 |
| 60 | [Fe(C <sub>33</sub> H <sub>37</sub> N <sub>4</sub> Cl)] | 6 | 3 | 0.39  | 1.36 | 70  | 47 |
| 61 | [Fe(porphyrin)(CH <sub>3</sub> COO)]                    | 6 | 3 | 0.40  | 1.10 | 4.2 | 48 |
| 62 | Fe(acac) <sub>3</sub>                                   | 6 | 3 | 0.53  | 0.64 | 78  | 49 |
| 63 | Fe(tfa) <sub>3</sub>                                    | 6 | 3 | 0.53  | 0.67 | 78  | 49 |
| 64 | [Fe(phen) <sub>2</sub> Cl <sub>2</sub> ] <sup>+</sup>   | 6 | 3 | 0.39  | 0.05 | 80  | 10 |
| 65 | PcFeCl                                                  | 6 | 3 | 0.28  | 2.56 | 77  | 21 |
| 66 | (Me <sub>2</sub> L <sup>Me,Me</sup> )FeCl <sub>2</sub>  | 6 | 3 | 0.33  | 1.23 | 80  | 50 |
| 67 | [Cp* <sub>2</sub> Fe(CO)] <sup>2+</sup>                 | 1 | 4 | 0.42  | 3.22 | 77  | 41 |
| 68 | [(TIMMN <sup>Me</sup> )Fe(NAd)] <sup>2+</sup>           | 1 | 4 | -0.14 | 3.54 | 80  | 22 |
| 69 | [(N <sub>3</sub> N')Fe(CN)]                             | 1 | 4 | -0.20 | 3.22 | 80  | 51 |
| 70 | Fe(PPh <sub>3</sub> ) <sub>2</sub> (“S2”) <sub>2</sub>  | 3 | 4 | 0.16  | 1.52 | 4.2 | 52 |
| 71 | Fe(PPh <sub>3</sub> )(“S2”) <sub>2</sub>                | 3 | 4 | 0.12  | 3.03 | 4.2 | 52 |
| 72 | [Fe(N <sub>4</sub> Py)(O)] <sup>2-</sup>                | 3 | 4 | -0.04 | 0.93 | 4.2 | 53 |
| 73 | [Fe(O)(TMC)(NCCH <sub>3</sub> )] <sup>2+</sup>          | 3 | 4 | 0.17  | 1.24 | 4.2 | 54 |
| 74 | [Cp* <sub>2</sub> Fe] <sup>2+</sup>                     | 3 | 4 | 0.59  | 2.00 | 77  | 41 |
| 75 | [Fe(O)(porphyrin)] <sup>+</sup>                         | 4 | 4 | 0.08  | 1.62 | 4.2 | 55 |
| 76 | [Fe(η <sup>4</sup> -MAC*)Cl] <sup>-</sup>               | 5 | 4 | 0.04  | 0.89 | 4.2 | 56 |
| 77 | [Fe(B*)(O)] <sup>-</sup>                                | 2 | 5 | -0.42 | 4.25 | 4.2 | 57 |
| 78 | [Fe(cyclam-acetate)(N)] <sup>+</sup>                    | 2 | 5 | -0.02 | 1.60 | 80  | 58 |
| 79 | [Fe(Me <sub>3</sub> cyclam-acetate)(N)] <sup>2+</sup>   | 1 | 6 | -0.29 | 1.53 | 4.2 | 59 |
| 80 | [(TIMMN <sup>Me</sup> )Fe(N)(F)] <sup>3+</sup>          | 2 | 7 | -0.72 | 3.30 | 78  | 60 |

<sup>[a]</sup>LS= low-spin; HS= high-spin; Pc= phthalocyanine; Me<sub>2</sub>L<sup>Me,Me</sup> = methyl substituted β-diketiminato; CNXyl = 2,6-dimethylphenyl isocyanide; Cp= cyclopentadiene; PyO= 6-methyl-2-pyridonate; PyS=, 6-methyl-pyridyl-2-thiolate; pyS<sub>4</sub>= dianion of 2,6-bis(2-mercaptophenylthiomethyl)pyridine; TMC= 1,4,8,11-tetramethyl-1,4,8,11-tetraazacyclotetradecane; OEP= dianion of octaethylporphyrin; bipy= 2,2'-bipyridine; phen= 1,10-phenanthroline; Pz= Pyrazole; ArNC= 2,6-Me<sub>2</sub>-C<sub>6</sub>H<sub>3</sub>NC; TPP= tetraphenylporphyrinate; TIMMN<sup>Me</sup>= tris-[2-(3-mesityl-imidazole-2-ylidene)-methyl]amine; Ad= adamantane; Hacpa = N-(1-acetyl-2-propylidene)(2-pyridylmethyl)amine; H<sub>2</sub>thpu= Pyruvic acid thiosemicarbazone; Cp\* = Pentamethylcyclopentadien; mnt = cis-1,2-dicyano-1,2-ethylenedithiolato; idzm =2-(p-pyridyl)-4,4,5,5-tetramethylimidazolium; acac= acetylacetonate; tfa= trifluoroacetylacetonate; MAC\* = tetra-anion of 1,4,8,11-tetraaza-13,13-diethyl-2,2,5,5,7,7,10,10-octamethyl-3,6,9,12,14-pentaoxocyclotetradecane; “S2” = 1,2-benzenedithiolato-S,S' dianion; B\* = tetra-anion of 3,3,6,6,9,9-hexamethyl-3,4,8,9-tetrahydro-1H-1,4,8,11-benzotetraazacyclotridecine-2,5,7,10(6H,11H)-tetraone. N<sub>3</sub>N' = tris(N-trimethylsilyl-2-amidoethyl)amine ligand; terpy= 2,2':6'2"-terpyridine; LN<sub>4</sub>= N-[(1-H-imidazol-4-yl)methylene]-N'-(1-pyridin-2-yl-ethylidene)-2,2-dimethyl-propane-1,3-diamin; TPpivP= “pivalamide-picket-fence” porphyrin; cyclam= 1,4,8,11-tetraazacyclotetradecane;

<sup>[b]</sup>Total spin multiplicity of the complex.

**Table S2:** 21 molecular iron complexes and their experimental isomer shifts present in the high-T subset. The experimental isomer shifts were recorded at room temperature or close.

|           | <b>Complex<sup>[a]</sup></b>                                                    | <b>2S+1<sup>[b]</sup></b> | <b>Fe ox. state</b> | <b><math>\delta_{\text{exp}}</math> (mm s<sup>-1</sup>)</b> | <b>Refs.</b> |
|-----------|---------------------------------------------------------------------------------|---------------------------|---------------------|-------------------------------------------------------------|--------------|
| <b>1</b>  | PcFe( <i>i</i> PrNH <sub>2</sub> ) <sub>2</sub>                                 | 1                         | 2                   | 0.25                                                        | 61           |
| <b>2</b>  | PcFe(dabco) <sub>2</sub>                                                        | 1                         | 2                   | 0.33                                                        | 61           |
| <b>3</b>  | PcFe(Pz) <sub>2</sub>                                                           | 1                         | 2                   | 0.26                                                        | 61           |
| <b>4</b>  | PcFe(THT) <sub>2</sub>                                                          | 1                         | 2                   | 0.27                                                        | 61           |
| <b>5</b>  | PcFe(CO)(Py)                                                                    | 1                         | 2                   | 0.11                                                        | 61           |
| <b>6</b>  | PcFe(CO)(NH <sub>3</sub> )                                                      | 1                         | 2                   | 0.12                                                        | 61           |
| <b>7</b>  | PcFe(PEt <sub>3</sub> ) <sub>2</sub>                                            | 1                         | 2                   | 0.16                                                        | 61           |
| <b>8</b>  | PcFe(Et <sub>2</sub> NH) <sub>2</sub>                                           | 1                         | 2                   | 0.25                                                        | 61           |
| <b>9</b>  | PcFe(MeIm) <sub>2</sub>                                                         | 1                         | 2                   | 0.24                                                        | 61           |
| <b>10</b> | PcFe(Iz) <sub>2</sub>                                                           | 1                         | 2                   | 0.27                                                        | 61           |
| <b>11</b> | PcFe(Pyr) <sub>2</sub>                                                          | 1                         | 2                   | 0.24                                                        | 61           |
| <b>12</b> | PcFe(Tetr) <sub>2</sub>                                                         | 1                         | 2                   | 0.15                                                        | 61           |
| <b>13</b> | PcFe(CO)(THF)                                                                   | 1                         | 2                   | 0.10                                                        | 61           |
| <b>14</b> | PcFe(CO)(Pip)                                                                   | 1                         | 2                   | 0.11                                                        | 61           |
| <b>15</b> | PcFe(P(OEt) <sub>3</sub> ) <sub>2</sub>                                         | 1                         | 2                   | 0.13                                                        | 61           |
| <b>16</b> | Fc(CO <sub>2</sub> H)                                                           | 1                         | 2                   | 0.44                                                        | 20           |
| <b>17</b> | PcFe(mepip) <sub>2</sub>                                                        | 1                         | 2                   | 0.27                                                        | 21           |
| <b>18</b> | {Fe[HC(3,5-Me <sub>2</sub> pz) <sub>3</sub> ] <sub>2</sub> }I <sub>2</sub> (HS) | 5                         | 2                   | 0.97                                                        | 62           |
| <b>19</b> | [Fe(acpa) <sub>2</sub> ] <sup>+</sup> (HS)                                      | 6                         | 3                   | 0.33                                                        | 39           |
| <b>20</b> | Fe(thpu)(Hthpu) (HS)                                                            | 6                         | 3                   | 0.47                                                        | 40           |
| <b>21</b> | [Fe(bipy) <sub>2</sub> Cl <sub>2</sub> ] <sup>+</sup>                           | 6                         | 3                   | 0.42                                                        | 23           |

<sup>[a]</sup>HS= high-spin; Pc= phthalocyanine; dabco= 1,4-diazabicyclo[2.2.2]octane; Pz= Pyrazole; THT=tetrahydrothiophene; MeIm= N-methylimidazole; Iz= isoxazole; Tetr= tetrazine; THF= tetrahydrofuran; Pip= piperidine; mepip= 4-methylpiperidine; Hacpa = N-(1-acetyl-2-propylidene)(2-pyridylmethyl)amine; H<sub>2</sub>thpu= Pyruvic acid thiosemicarbazone; bipy= 2,2'-bipyridine.

<sup>[b]</sup>Total spin multiplicity of the complex.

**Table S3:** Bond length and angles relevant to the Fe centre of two selected complexes. The structures are optimized by employing Defgrid2 and Defgrid3 integration grids and TPSSh-D3BJ/X2C/x2c-TZVPall method.

| Complex #09 [Fe <sup>II</sup> ; 2S+1=1]           |          |          | Complex #57 [Fe <sup>III</sup> ; 2S+1=4]         |          |          |
|---------------------------------------------------|----------|----------|--------------------------------------------------|----------|----------|
| Bond lengths (Å)<br>&<br>Bond angles (°)          | Defgrid2 | Defgrid3 | Bond lengths (Å)<br>&<br>Bond angles (°)         | Defgrid2 | Defgrid3 |
| Fe <sub>1</sub> -N <sub>4</sub>                   | 1.939    | 1.939    | Fe <sub>1</sub> -S <sub>2</sub>                  | 2.264    | 2.264    |
| Fe <sub>1</sub> -N <sub>5</sub>                   | 2.017    | 2.017    | Fe <sub>1</sub> -S <sub>3</sub>                  | 2.280    | 2.280    |
| Fe <sub>1</sub> -N <sub>6</sub>                   | 1.918    | 1.918    | Fe <sub>1</sub> -S <sub>4</sub>                  | 2.270    | 2.270    |
| Fe <sub>1</sub> -N <sub>7</sub>                   | 1.936    | 1.936    | Fe <sub>1</sub> -N <sub>6</sub>                  | 1.705    | 1.705    |
| Fe <sub>1</sub> -N <sub>8</sub>                   | 1.938    | 1.938    | N <sub>6</sub> -O <sub>5</sub>                   | 1.179    | 1.179    |
| Fe <sub>1</sub> -N <sub>9</sub>                   | 1.950    | 1.950    |                                                  |          |          |
| ∠N <sub>9</sub> -Fe <sub>1</sub> -N <sub>4</sub>  | 85.2     | 85.1     | ∠Fe <sub>1</sub> -N <sub>6</sub> -O <sub>5</sub> | 174.0    | 174.0    |
| ∠N <sub>9</sub> -Fe <sub>1</sub> -N <sub>5</sub>  | 84.5     | 84.5     | ∠S <sub>2</sub> -Fe <sub>1</sub> -N <sub>6</sub> | 103.5    | 103.6    |
| ∠N <sub>9</sub> -Fe <sub>1</sub> -N <sub>6</sub>  | 101.4    | 101.4    | ∠S <sub>3</sub> -Fe <sub>1</sub> -N <sub>6</sub> | 113.2    | 113.2    |
| ∠N <sub>9</sub> -Fe <sub>1</sub> -N <sub>7</sub>  | 89.0     | 89.0     | ∠S <sub>4</sub> -Fe <sub>1</sub> -N <sub>6</sub> | 112.8    | 112.7    |
| ∠N <sub>8</sub> -Fe <sub>1</sub> -N <sub>4</sub>  | 93.5     | 93.4     |                                                  |          |          |
| ∠N <sub>8</sub> -Fe <sub>1</sub> -N <sub>5</sub>  | 90.2     | 90.2     |                                                  |          |          |
| ∠N <sub>8</sub> -Fe <sub>1</sub> -N <sub>6</sub>  | 84.1     | 84.1     |                                                  |          |          |
| ∠N <sub>8</sub> -Fe <sub>1</sub> -N <sub>7</sub>  | 92.8     | 92.8     |                                                  |          |          |
| ∠Fe <sub>1</sub> -N <sub>8</sub> -C <sub>52</sub> | 147.2    | 147.2    |                                                  |          |          |
| ∠Fe <sub>1</sub> -N <sub>9</sub> -C <sub>51</sub> | 142.4    | 142.4    |                                                  |          |          |
| ∠N <sub>9</sub> -Fe <sub>1</sub> -N <sub>8</sub>  | 174.1    | 174.1    |                                                  |          |          |

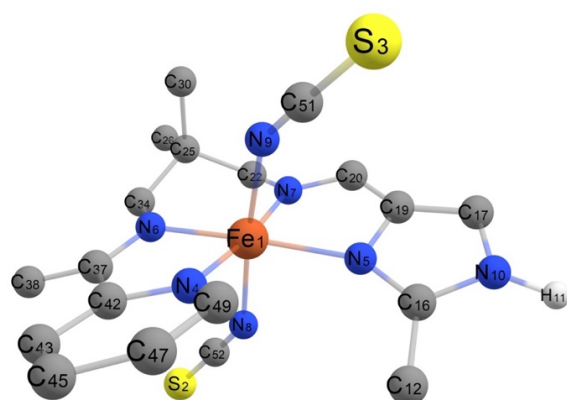

Complex #09

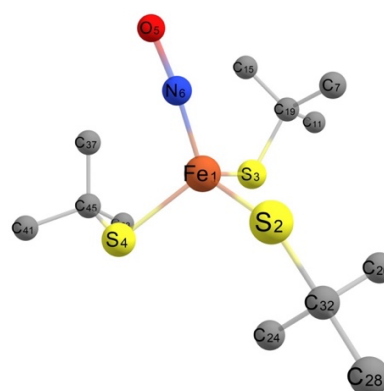

Complex #57

**Table S4:** Calibration constants and statistical parameters obtained by fitting  $\delta_{\text{exp}} = \{a[\rho(0) - C] + b\}$  for different basis sets of Fe. The calculations were performed using B3LYP functional, point nucleus model, and first order picture change effect.<sup>[a]</sup>

| Basis set for Fe                                     | <i>a</i> | <i>b</i> | <i>C</i> | <i>R</i> <sup>2</sup> | MAD <sup>[b]</sup><br>(mm s <sup>-1</sup> ) | Max.<br>Dev. <sup>[c]</sup><br>(mm s <sup>-1</sup> ) | St. Dev. <sup>[d]</sup><br>(mm s <sup>-1</sup> ) |
|------------------------------------------------------|----------|----------|----------|-----------------------|---------------------------------------------|------------------------------------------------------|--------------------------------------------------|
| CP(PPP)                                              | -0.30    | 1.1422   | 14398    | 0.951                 | 0.056                                       | 0.201                                                | 0.074                                            |
| x2c-TZVPPall                                         | -0.22    | 0.9337   | 13652    | 0.813                 | 0.112                                       | 0.347                                                | 0.144                                            |
| x2c-TZVPPall-s                                       | -0.21    | 0.9939   | 13652    | 0.789                 | 0.120                                       | 0.369                                                | 0.153                                            |
| aug-cc-pVTZ-J                                        | -0.55    | 1.3429   | 7762     | 0.942                 | 0.060                                       | 0.228                                                | 0.080                                            |
| DKH-def2-TZVPP                                       | -0.30    | 1.0041   | 14078    | 0.939                 | 0.063                                       | 0.208                                                | 0.082                                            |
| ANO-RCC-VTZP                                         | -0.18    | 0.9043   | 15626    | 0.416                 | 0.185                                       | 0.730                                                | 0.255                                            |
| <i>s</i> -decontracted x2c-TZVPPall                  | -0.31    | 1.0685   | 13695    | 0.943                 | 0.059                                       | 0.195                                                | 0.080                                            |
| <i>s</i> -decontracted aug-cc-pVTZ-J                 | -0.26    | 1.1819   | 16644    | 0.943                 | 0.060                                       | 0.212                                                | 0.080                                            |
| <i>s</i> -decontracted aug-cc-pVTZ-J (- <i>dfg</i> ) | -0.26    | 1.2129   | 16644    | 0.951                 | 0.057                                       | 0.214                                                | 0.074                                            |
| aug-cc-pVTZ-Jmod <sup>63</sup>                       | -0.28    | 1.0331   | 14943    | 0.943                 | 0.060                                       | 0.212                                                | 0.080                                            |

<sup>[a]</sup> *a* and *b* are the fitting coefficients obtained from the fit of  $\delta_{\text{exp}} = \{a[\rho(0) - C] + b\}$ . *C* is a constant, which is very close to the calculated  $\rho(0)$  value. The units of *a*, *b*, and *C* are a.u.<sup>3</sup> mm s<sup>-1</sup>, mm s<sup>-1</sup>, and a.u.<sup>-3</sup>, respectively. *R*<sup>2</sup> is the coefficient of determination from the linear fit.

<sup>[b]</sup> Mean absolute deviations of the calculated ISs with respect to the experimental ISs, where the former ones are obtained by using  $\delta_{\text{exp}} = \{a[\rho(0) - C] + b\}$ .

<sup>[c]</sup> Maximum deviation of the calculated ISs from the experimental ISs.

<sup>[d]</sup> Standard deviation of the calculated ISs.

**Table S5:** Calibration constants and statistical parameters from the linear regression analysis of the computed contact densities using different DFT functionals and the experimental isomer shifts using.<sup>[a]</sup> The *s*-decontracted aug-cc-pVTZ-J(-*dfg*) basis set was employed across the board for Fe.

| Methods       | <i>a</i> | <i>b</i> | <i>C</i> | R <sup>2</sup> | MAD <sup>[b]</sup><br>(mm s <sup>-1</sup> ) | Max. Dev. <sup>[c]</sup><br>(mm s <sup>-1</sup> ) | St. Dev. <sup>[d]</sup><br>(mm s <sup>-1</sup> ) |
|---------------|----------|----------|----------|----------------|---------------------------------------------|---------------------------------------------------|--------------------------------------------------|
| SVWN5         | -0.32    | 0.8909   | 14831    | 0.913          | 0.071                                       | 0.296                                             | 0.098                                            |
| BP86          | -0.32    | 0.9924   | 14960    | 0.922          | 0.067                                       | 0.270                                             | 0.093                                            |
| PBE           | -0.31    | 0.9936   | 14933    | 0.920          | 0.067                                       | 0.267                                             | 0.094                                            |
| BLYP          | -0.32    | 1.0945   | 14954    | 0.917          | 0.070                                       | 0.274                                             | 0.096                                            |
| TPSS          | -0.32    | 1.0013   | 14917    | 0.935          | 0.060                                       | 0.243                                             | 0.085                                            |
| PBE0          | -0.28    | 1.1199   | 14920    | 0.965          | 0.050                                       | 0.149                                             | 0.063                                            |
| B1LYP         | -0.28    | 1.1340   | 14936    | 0.961          | 0.054                                       | 0.151                                             | 0.066                                            |
| B3LYP         | -0.29    | 1.1051   | 14930    | 0.958          | 0.053                                       | 0.181                                             | 0.069                                            |
| TPSSh         | -0.30    | 1.1945   | 14913    | 0.954          | 0.052                                       | 0.228                                             | 0.072                                            |
| TPSS0         | -0.28    | 1.1402   | 14908    | 0.968          | 0.048                                       | 0.123                                             | 0.060                                            |
| M06           | -0.31    | 0.9414   | 15010    | 0.936          | 0.065                                       | 0.278                                             | 0.084                                            |
| LC-BLYP       | -0.29    | 1.0826   | 14951    | 0.950          | 0.062                                       | 0.169                                             | 0.075                                            |
| CAM-B3LYP     | -0.27    | 1.2037   | 14939    | 0.958          | 0.056                                       | 0.138                                             | 0.068                                            |
| $\omega$ B97X | -0.27    | 1.1675   | 15034    | 0.958          | 0.055                                       | 0.147                                             | 0.068                                            |
| B2PLYP        | -0.24    | 1.1366   | 14916    | 0.939          | 0.066                                       | 0.182                                             | 0.082                                            |

<sup>[a]</sup> *a* and *b* are the fitting coefficients obtained from the fit of  $\delta_{\text{exp}} = \{a[\rho(0) - C] + b\}$ . *C* is a constant, which is very close to the calculated  $\rho(0)$  value. The units of *a*, *b*, and *C* are a.u.<sup>3</sup> mm s<sup>-1</sup>, mm s<sup>-1</sup>, and a.u.<sup>-3</sup>, respectively. R<sup>2</sup> is the coefficient of determination from the linear fit.

<sup>[b]</sup> Mean absolute deviations of the calculated ISs with respect to the experimental ISs, where the former ones are obtained by using  $\delta_{\text{exp}} = \{a[\rho(0) - C] + b\}$ .

<sup>[c]</sup> Maximum deviation of the calculated ISs from the experimental ISs.

<sup>[d]</sup> Standard deviation of the calculated ISs.

**Table S6:** Calibration constants and statistical parameters from the linear regression analysis of the computed contact densities using different DFT functionals with varying %HF exchange and the experimental isomer shifts.<sup>[a]</sup>

| Functionals | <i>a</i> | <i>b</i> | C     | R <sup>2</sup> | MAD <sup>[b]</sup><br>(mm s <sup>-1</sup> ) | Max. Dev. <sup>[c]</sup><br>(mm s <sup>-1</sup> ) | St. Dev. <sup>[d]</sup><br>(mm s <sup>-1</sup> ) |
|-------------|----------|----------|-------|----------------|---------------------------------------------|---------------------------------------------------|--------------------------------------------------|
| BLYP        | -0.32    | 1.0974   | 14954 | 0.917          | 0.070                                       | 0.275                                             | 0.096                                            |
| B10LYP      | -0.30    | 1.0647   | 14947 | 0.942          | 0.059                                       | 0.227                                             | 0.080                                            |
| B1LYP       | -0.28    | 1.1358   | 14936 | 0.961          | 0.054                                       | 0.150                                             | 0.066                                            |
| B30LYP      | -0.27    | 1.2415   | 14932 | 0.961          | 0.054                                       | 0.140                                             | 0.066                                            |
| BH&HLYP     | -0.24    | 1.1259   | 14918 | 0.942          | 0.064                                       | 0.175                                             | 0.080                                            |
| B70LYP      | -0.22    | 1.0230   | 14904 | 0.910          | 0.081                                       | 0.236                                             | 0.100                                            |
| TPSS        | -0.32    | 1.0045   | 14917 | 0.935          | 0.060                                       | 0.243                                             | 0.085                                            |
| TPSSh       | -0.30    | 1.1976   | 14913 | 0.954          | 0.052                                       | 0.227                                             | 0.072                                            |
| TPSS0       | -0.28    | 1.1425   | 14908 | 0.967          | 0.049                                       | 0.122                                             | 0.060                                            |
| TPSS30      | -0.27    | 1.2122   | 14906 | 0.966          | 0.050                                       | 0.131                                             | 0.062                                            |
| TPSS50      | -0.24    | 1.2125   | 14899 | 0.945          | 0.064                                       | 0.185                                             | 0.078                                            |
| TPSS70      | -0.22    | 1.2021   | 14892 | 0.912          | 0.080                                       | 0.263                                             | 0.099                                            |

<sup>[a]</sup> *a* and *b* are the fitting coefficients obtained from the fit of  $\delta_{\text{exp}} = \{a[\rho(0) - C] + b\}$ . *C* is a constant, which is very close to the calculated  $\rho(0)$  value. The units of *a*, *b*, and *C* are a.u.<sup>3</sup> mm s<sup>-1</sup>, mm s<sup>-1</sup>, and a.u.<sup>-3</sup>, respectively. R<sup>2</sup> is the coefficient of determination from the linear fit.

<sup>[b]</sup> Mean absolute deviations of the calculated ISs with respect to the experimental ISs, where the former ones are obtained by using  $\delta_{\text{exp}} = \{a[\rho(0) - C] + b\}$ .

<sup>[c]</sup> Maximum deviation of the calculated ISs from the experimental ISs.

<sup>[d]</sup> Standard deviation of the calculated ISs.

**Table S7:** Calibration constants and statistical parameters from the linear regression analysis of the B2PLYP/*s*-decontracted aug-cc-pVTZ-J (Fe) level contact densities against the experimental isomer shifts with unrelaxed and relaxed PT2 density.<sup>[a]</sup>

| PT2 density | <i>a</i> | <i>b</i> | C     | R <sup>2</sup> | MAD <sup>[b]</sup><br>(mm s <sup>-1</sup> ) | Max. Dev. <sup>[c]</sup><br>(mm s <sup>-1</sup> ) | St. Dev. <sup>[d]</sup><br>(mm s <sup>-1</sup> ) |
|-------------|----------|----------|-------|----------------|---------------------------------------------|---------------------------------------------------|--------------------------------------------------|
| Unrelaxed   | -0.24    | 1.1367   | 14916 | 0.939          | 0.066                                       | 0.183                                             | 0.083                                            |
| Relaxed     | -0.27    | 1.2174   | 14916 | 0.916          | 0.072                                       | 0.306                                             | 0.096                                            |

<sup>[a]</sup> *a* and *b* are the fitting coefficients obtained from the fit of  $\delta_{\text{exp}} = \{a[\rho(0) - C] + b\}$ . *C* is a constant, which is very close to the calculated  $\rho(0)$  value. The units of *a*, *b*, and *C* are a.u.<sup>3</sup> mm s<sup>-1</sup>, mm s<sup>-1</sup>, and a.u.<sup>-3</sup>, respectively. R<sup>2</sup> is the coefficient of determination from the linear fit.

<sup>[b]</sup> Mean absolute deviations of the calculated ISs with respect to the experimental ISs, where the former ones are obtained by using  $\delta_{\text{exp}} = \{a[\rho(0) - C] + b\}$ .

<sup>[c]</sup> Maximum deviation of the calculated ISs from the experimental ISs.

<sup>[d]</sup> Standard deviation of the calculated ISs.



**Table S8:** For ten different basis sets, the mean absolute deviations (MADs) and root-mean-square deviations (RMSDs) of calculated quadrupole splittings with respect to the experimental values. The scalar-relativistic calculations were performed with X2C Hamiltonian, B3LYP functional, first order picture change effect, and point nucleus model.

| Basis set for Fe                                    | MAD (mm s <sup>-1</sup> ) | RMSD (mm s <sup>-1</sup> ) |
|-----------------------------------------------------|---------------------------|----------------------------|
| CP(PPP)                                             | 0.308                     | 0.447                      |
| x2c-TZVPPall                                        | 0.363                     | 0.518                      |
| x2c-TZVPPall-s                                      | 0.316                     | 0.455                      |
| aug-cc-pVTZ-J                                       | 0.379                     | 0.536                      |
| DKH-def2-TZVPP                                      | 0.255                     | 0.367                      |
| ANO-RCC-TZP                                         | 0.373                     | 0.801                      |
| <i>s</i> -decontracted x2c-TZVPPall                 | 0.387                     | 0.515                      |
| <i>s</i> -decontracted aug-cc-pVTZ-J                | 0.373                     | 0.520                      |
| <i>s</i> -decontracted aug-cc-pVTZ-J(- <i>dfg</i> ) | 0.373                     | 0.520                      |
| aug-cc-pVTZ-Jmod <sup>63</sup>                      | 0.351                     | 0.494                      |

**Table S9:** Performance of DFT functionals with varying fraction of HF exchange for the calculation of <sup>57</sup>Fe quadrupole splitting ( $\Delta E_Q$ ) values. The *s*-decontracted aug-cc-pVTZ-J(-*dfg*) basis set was employed across the board for iron.

| Methods       | MAD (mm s <sup>-1</sup> ) | RMSD (mm s <sup>-1</sup> ) |
|---------------|---------------------------|----------------------------|
| SVWN5         | 0.322                     | 0.498                      |
| BP86          | 0.271                     | 0.447                      |
| PBE           | 0.280                     | 0.457                      |
| BLYP          | 0.273                     | 0.450                      |
| TPSS          | 0.268                     | 0.436                      |
| PBE0          | 0.377                     | 0.526                      |
| B1LYP         | 0.406                     | 0.559                      |
| B3LYP         | 0.349                     | 0.489                      |
| TPSSh         | 0.261                     | 0.410                      |
| TPSS0         | 0.384                     | 0.524                      |
| M06           | 0.548                     | 0.952                      |
| LC-BLYP       | 0.435                     | 0.564                      |
| CAM-B3LYP     | 0.484                     | 0.643                      |
| $\omega$ B97X | 0.496                     | 0.652                      |
| B2PLYP        | 0.651                     | 0.860                      |

**Table S10:** Performance of DFT functionals with varying fraction of HF exchange for the calculation of  $^{57}\text{Fe}$  quadrupole splitting ( $\Delta E_Q$ ) values. The *s*-decontracted aug-cc-pVTZ-J basis set was employed for Fe.

| <b>Method</b> | <b>MAD (mm s<sup>-1</sup>)</b> | <b>RMSD (mm s<sup>-1</sup>)</b> |
|---------------|--------------------------------|---------------------------------|
| BLYP          | 0.272                          | 0.450                           |
| B10LYP        | 0.279                          | 0.432                           |
| B1LYP         | 0.404                          | 0.557                           |
| B30LYP        | 0.458                          | 0.617                           |
| BHandHLYP     | 0.640                          | 0.846                           |
| B69LYP        | 0.750                          | 1.019                           |
| TPSS          | 0.269                          | 0.437                           |
| TPSSh         | 0.261                          | 0.410                           |
| TPSS0         | 0.383                          | 0.525                           |
| TPSS30        | 0.419                          | 0.566                           |
| TPSS50        | 0.601                          | 0.793                           |
| TPSS69        | 0.714                          | 0.959                           |

**Table S11:** Calculated isomer shifts of nine quintet Fe<sup>II</sup> and nine sextet Fe<sup>III</sup> complexes using the computed  $\rho(0)$  and fitting parameters for TPSS0, B2PLYP, and DSD-PBEP86 functionals. Signed deviations and mean absolute error is reported with respect to the experimental isomer shifts.

|                                | # Complexes<br>in<br>MPMIC80 | $\delta_{\text{exp}}$<br>(mm s <sup>-1</sup> ) | $\delta_{\text{cal}}$ (mm s <sup>-1</sup> ) |              |              | SD(mm s <sup>-1</sup> ) <sup>[a]</sup> |        |            |
|--------------------------------|------------------------------|------------------------------------------------|---------------------------------------------|--------------|--------------|----------------------------------------|--------|------------|
|                                |                              |                                                | TPSS0                                       | B2PLYP       | DSD-PBEP86   | TPSS0                                  | B2PLYP | DSD-PBEP86 |
| Quintet<br>Fe <sup>II</sup>    | <b>37</b>                    | 1.01                                           | 0.99                                        | 0.97         | 1.03         | -0.02                                  | -0.04  | 0.02       |
|                                | <b>38</b>                    | 1.08                                           | 0.96                                        | 0.95         | 1.02         | -0.12                                  | -0.13  | -0.06      |
|                                | <b>39</b>                    | 1.11                                           | 1.01                                        | 1.00         | 1.05         | -0.10                                  | -0.11  | -0.06      |
|                                | <b>40</b>                    | 0.67                                           | 0.66                                        | 0.62         | 0.67         | 0.00                                   | -0.05  | 0.00       |
|                                | <b>41</b>                    | 0.66                                           | 0.67                                        | 0.62         | 0.66         | 0.01                                   | -0.04  | 0.00       |
|                                | <b>42</b>                    | 0.97                                           | 0.92                                        | 0.90         | 0.95         | -0.05                                  | -0.07  | -0.02      |
|                                | <b>43</b>                    | 0.56                                           | 0.49                                        | 0.43         | 0.46         | -0.07                                  | -0.13  | -0.10      |
|                                | <b>44</b>                    | 1.05                                           | 0.96                                        | 0.94         | 0.99         | -0.09                                  | -0.11  | -0.06      |
|                                | <b>45</b>                    | 0.84                                           | 0.80                                        | 0.75         | 0.80         | -0.04                                  | -0.09  | -0.04      |
| Sextet<br>Fe <sup>III</sup>    | <b>58</b>                    | 0.25                                           | 0.21                                        | 0.26         | 0.19         | -0.04                                  | 0.01   | -0.06      |
|                                | <b>59</b>                    | 0.18                                           | 0.29                                        | 0.35         | 0.30         | 0.11                                   | 0.17   | 0.12       |
|                                | <b>60</b>                    | 0.39                                           | 0.36                                        | 0.36         | 0.33         | -0.03                                  | -0.03  | -0.06      |
|                                | <b>61</b>                    | 0.40                                           | 0.42                                        | 0.41         | 0.38         | 0.02                                   | 0.01   | -0.02      |
|                                | <b>62</b>                    | 0.53                                           | 0.61                                        | 0.59         | 0.55         | 0.08                                   | 0.06   | 0.02       |
|                                | <b>63</b>                    | 0.53                                           | 0.61                                        | 0.59         | 0.56         | 0.08                                   | 0.06   | 0.03       |
|                                | <b>64</b>                    | 0.39                                           | 0.47                                        | 0.47         | 0.43         | 0.08                                   | 0.08   | 0.04       |
|                                | <b>65</b>                    | 0.28                                           | 0.38                                        | 0.37         | 0.34         | 0.10                                   | 0.09   | 0.06       |
|                                | <b>66</b>                    | 0.33                                           | 0.31                                        | 0.33         | 0.27         | -0.02                                  | 0.00   | -0.06      |
| <b>MAD (mm s<sup>-1</sup>)</b> |                              |                                                | <b>0.058</b>                                | <b>0.071</b> | <b>0.048</b> |                                        |        |            |

$$^{[a]}\text{SD} = \text{Signed Deviation} = [\delta_{\text{cal}} - \delta_{\text{exp}}]/\text{mm s}^{-1}$$

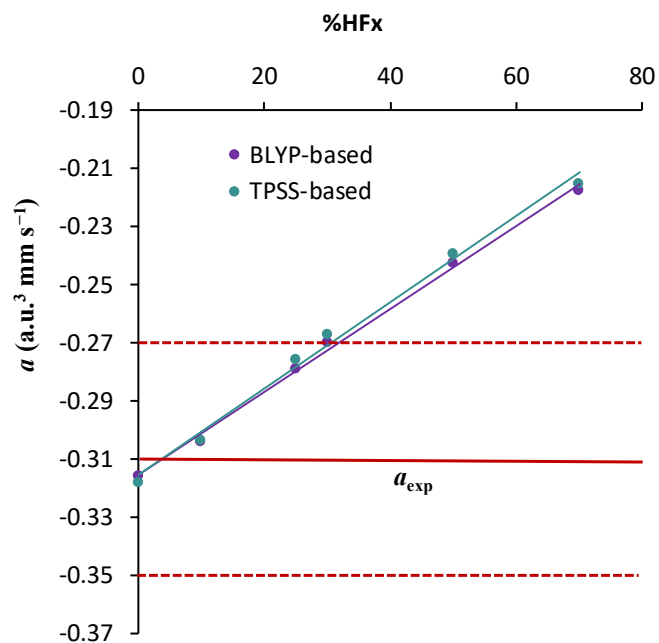

**Figure S1:** Effect of HF exchange on “ $a$ ”, obtained from linear regression analysis. The red solid line represents the experimental “ $a$ ”, and the dashed line are the upper and lower limit of “ $a$ ” reported in Ref.<sup>64</sup> Color code: violet for the BLYP- and teal for the TPSS-based functionals.

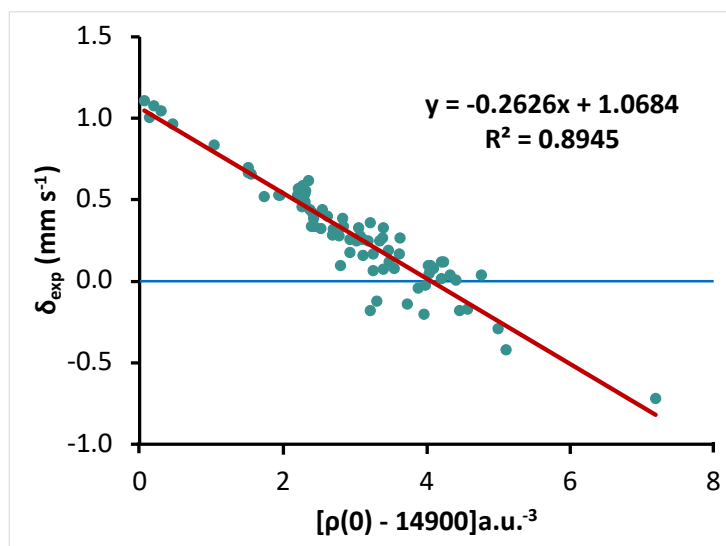

**Figure S2:** Linear fit of the DSD-PBEP86/*s*-decontracted aug-cc-pVTZ-J (Fe) + x2c-TZVPPall level contact densities against the experimental isomer shifts with relaxed PT2 density.

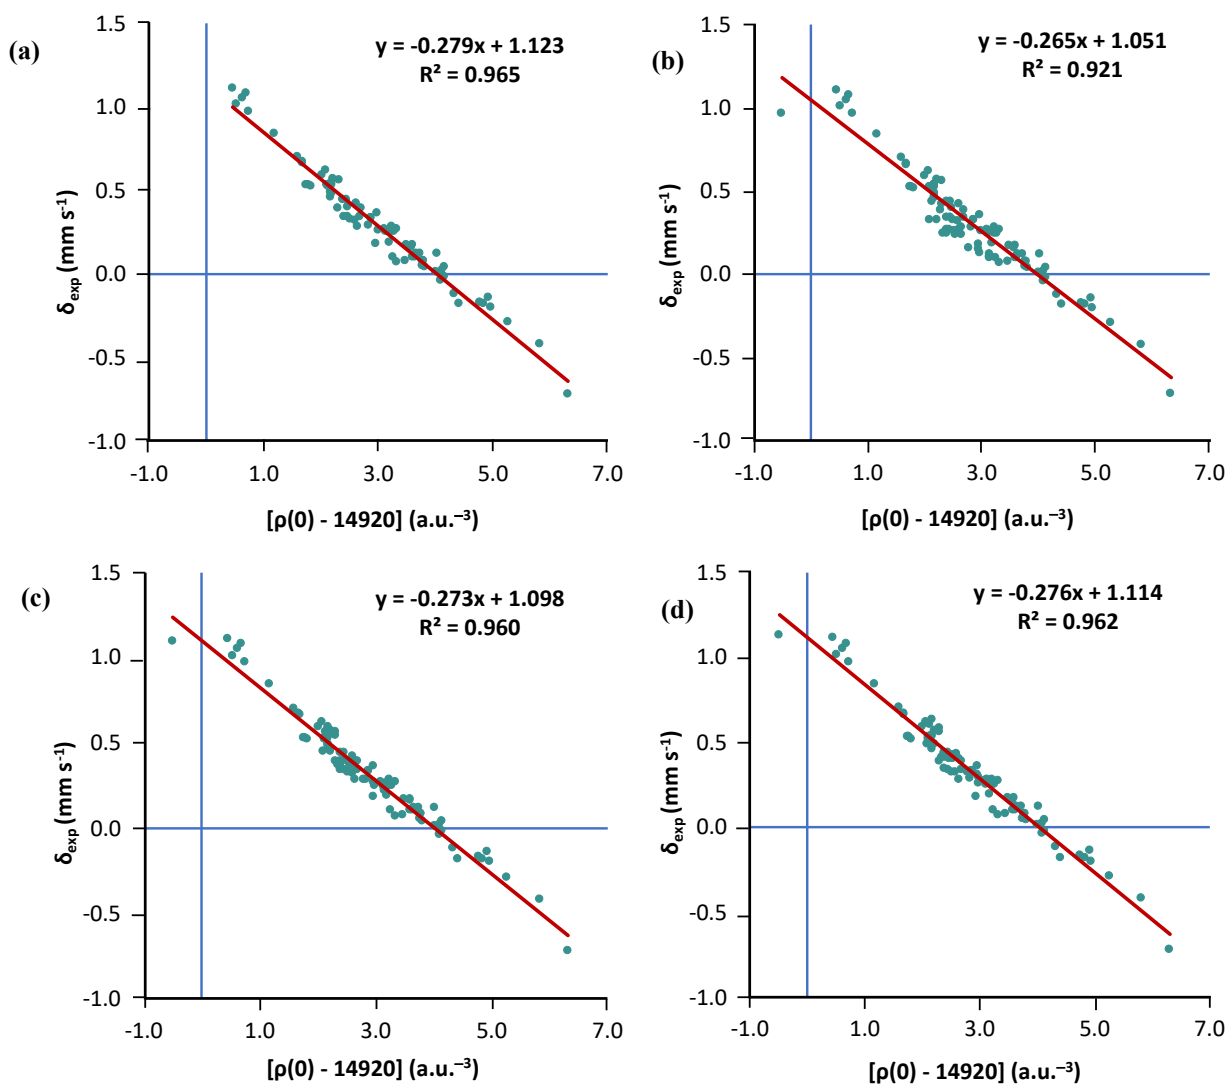

**Figure S3:** Linear fit of the calculated PBE0/*s*-decontracted aug-cc-pVTZ-J+x2c-TZVPPall level contact densities against the (a) low-T isomer shifts of MPMIC80; (b) 80 low-T and 21 high-T isomer shifts; (c) 80 low-T isomer shifts and 21 isomer shifts with Noodleman's high-T SODS correction ( $0.12 \text{ mm s}^{-1}$ )<sup>65-68</sup> and (d) 80 low-T isomer shifts and 21 isomer shifts with refitted high-T SODS correction ( $0.16 \text{ mm s}^{-1}$ ).

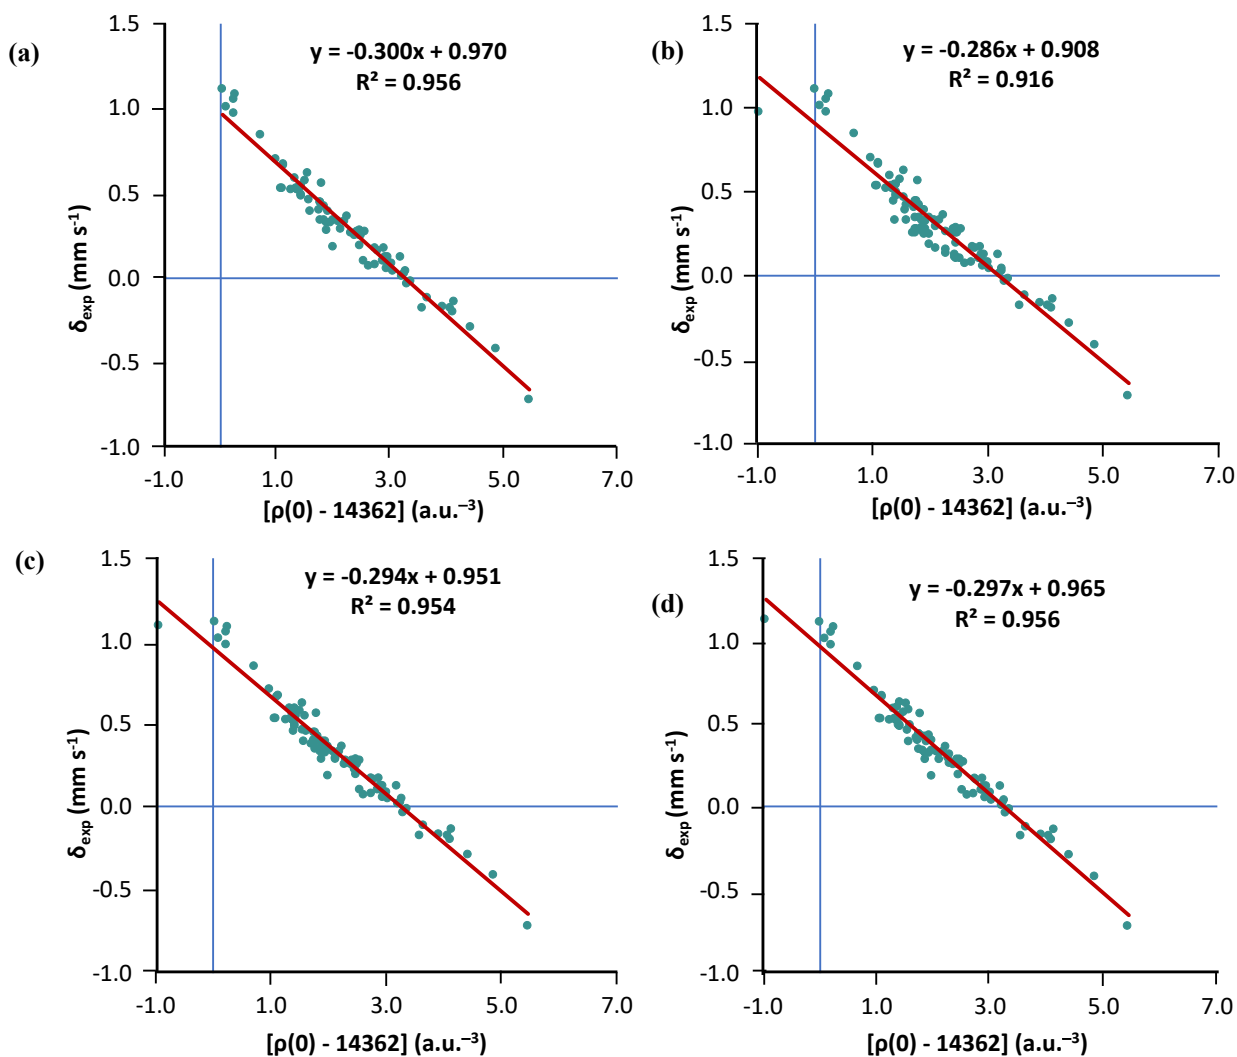

**Figure S4:** Linear fit of the calculated B3LYP/CP(PPP)+x2c-TZVPPall level contact densities against the (a) low-T isomer shifts of MPMIC80; (b) 80 low-T and 21 high-T isomer shifts; (c) 80 low-T isomer shifts and 21 isomer shifts with Noodleman's high-T SODS correction ( $0.12 \text{ mm s}^{-1}$ )<sup>65-68</sup> and (d) 80 low-T isomer shifts and 21 isomer shifts with refitted high-T SODS correction ( $0.16 \text{ mm s}^{-1}$ ).

(a)

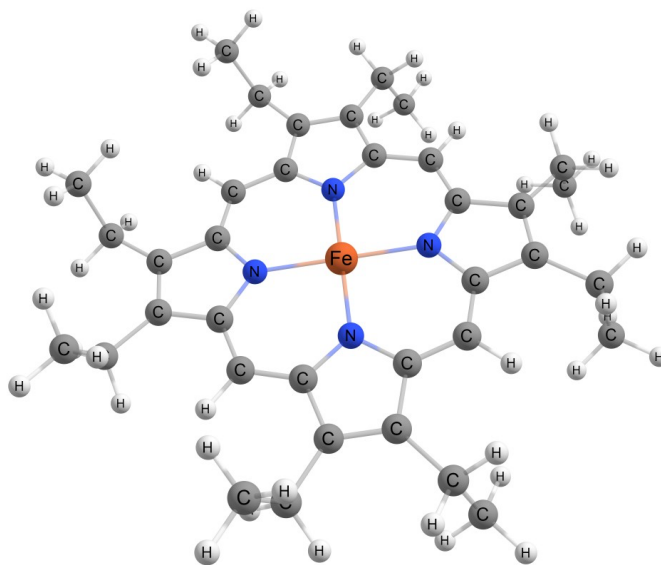

(b)

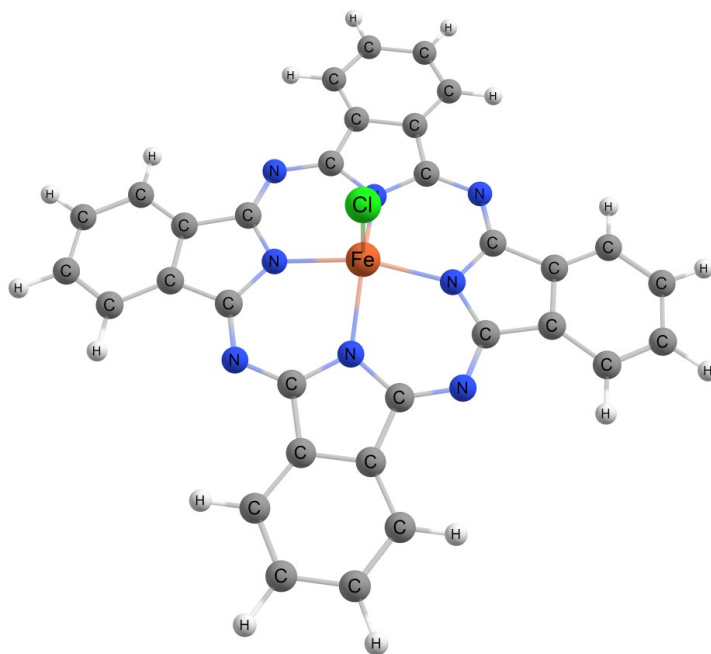

**Figure S5:** Structures of (a) iron(III) phthalocyanine chloride and (b) octaethylporphyrinato-iron(II).



## ORCA Sample Inputs

### A. Optimization

```
! TPSSh D3BJ RIJCOSX x2c/J x2c x2c-TZVPall DEFGRID2 TightSCF Opt
! PrintBasis PrintMOs

%rel
PictureChange 1
end

* xyzfile [Charge] [Multiplicity] [XYZFileName.xyz]
```

### B. Mössbauer property calculation

#### TPSS0/s-decontracted aug-cc-pVTZ-J + x2c-TZVPPall

```
! UKS TPSS0 RIJCOSX x2c/J x2c x2c-TZVPPall PrintBasis DEFGRID3
! TightSCF NoPOP PrintMOs
```

```
%rel
PictureChange 1
FiniteNuc true
end
```

```
%basis
NewGTO Fe
S 1
  1 8584004113.000000000 1.000000000
S 1
  1 1285418254.000000000 1.000000000
S 1
  1 192485938.500000000 1.000000000
S 1
  1 28823953.9100000001 1.000000000
S 1
  1 4316265.000000000 1.000000000
S 1
  1 646342.400000000 1.000000000
S 1
  1 147089.700000000 1.000000000
S 1
  1 41661.520000000 1.000000000
S 1
  1 13590.770000000 1.000000000
S 1
  1 4905.750000000 1.000000000
S 1
  1 1912.746000000 1.000000000
S 1
  1 792.604300000 1.000000000
S 1
  1 344.806500000 1.000000000
S 1
```

|      |                  |               |
|------|------------------|---------------|
| 1    | 155.8999000000   | 1.0000000000  |
| S 1  |                  |               |
| 1    | 72.2309100000    | 1.0000000000  |
| S 1  |                  |               |
| 1    | 32.7250600000    | 1.0000000000  |
| S 1  |                  |               |
| 1    | 15.6676200000    | 1.0000000000  |
| S 1  |                  |               |
| 1    | 7.5034830000     | 1.0000000000  |
| S 1  |                  |               |
| 1    | 3.3122230000     | 1.0000000000  |
| S 1  |                  |               |
| 1    | 1.5584710000     | 1.0000000000  |
| S 1  |                  |               |
| 1    | 0.6839140000     | 1.0000000000  |
| S 1  |                  |               |
| 1    | 0.1467570000     | 1.0000000000  |
| S 1  |                  |               |
| 1    | 0.0705830000     | 1.0000000000  |
| S 1  |                  |               |
| 1    | 0.0314490000     | 1.0000000000  |
| S 1  |                  |               |
| 1    | 0.0140100000     | 1.0000000000  |
| P 10 |                  |               |
| 1    | 74965.5865200000 | -0.0000030652 |
| 2    | 17745.6900000000 | -0.0000426385 |
| 3    | 4200.7210000000  | -0.0004353595 |
| 4    | 1364.4290000000  | -0.0023546474 |
| 5    | 522.0806000000   | -0.0109370575 |
| 6    | 221.4595000000   | -0.0379266480 |
| 7    | 100.9096000000   | -0.1071129611 |
| 8    | 48.4011500000    | -0.2385782781 |
| 9    | 23.9853600000    | -0.3765275830 |
| 10   | 12.1825000000    | -0.3753260135 |
| P 10 |                  |               |
| 1    | 74965.5865200000 | -0.0000026059 |
| 2    | 17745.6900000000 | -0.0000381329 |
| 3    | 4200.7210000000  | -0.0003782391 |
| 4    | 1364.4290000000  | -0.0021042401 |
| 5    | 522.0806000000   | -0.0096040490 |
| 6    | 221.4595000000   | -0.0344433334 |
| 7    | 100.9096000000   | -0.0978912053 |
| 8    | 48.4011500000    | -0.2337788211 |
| 9    | 23.9853600000    | -0.3706145174 |
| 10   | 12.1825000000    | -0.3955462688 |
| P 1  |                  |               |
| 1    | 6.2422980000     | 1.0000000000  |
| P 1  |                  |               |
| 1    | 3.1109440000     | 1.0000000000  |
| P 1  |                  |               |
| 1    | 1.5099580000     | 1.0000000000  |
| P 1  |                  |               |
| 1    | 0.7108450000     | 1.0000000000  |
| P 1  |                  |               |
| 1    | 0.2731900000     | 1.0000000000  |
| P 1  |                  |               |
| 1    | 0.1042330000     | 1.0000000000  |
| P 1  |                  |               |
| 1    | 0.0382910000     | 1.0000000000  |
| P 1  |                  |               |
| 1    | 0.0140700000     | 1.0000000000  |

```

D 4
  1 381.8765668000 -0.0017960559
  2 113.3440000000 -0.0275628524
  3 33.6414000000 -0.2268797508
  4 12.3310000000 -0.8288676519
D 1
  1 4.9947800000 1.0000000000
D 1
  1 2.0728000000 1.0000000000
D 1
  1 0.8307530000 1.0000000000
D 1
  1 0.3091780000 1.0000000000
D 1
  1 0.1001300000 1.0000000000
D 1
  1 0.0324300000 1.0000000000
F 1
  1 3.2758000000 1.0000000000
F 1
  1 0.7920000000 1.0000000000
F 1
  1 0.2749000000 1.0000000000
G 1
  1 2.0897000000 1.0000000000
G 1
  1 0.7871600000 1.0000000000
end
end

```

```
* xyzfile [Charge] [Multiplicity] [XYZFileName.xyz]
```

```
%eprnmr
nuclei = all Fe { fgrad, rho}
end
```

## Modified basis sets for iron

### A. *s*-decontracted aug-cc-pVTZ-J

NewGTO Fe

|   |    |                       |               |
|---|----|-----------------------|---------------|
| S | 1  |                       |               |
|   | 1  | 8584004113.0000000000 | 1.0000000000  |
| S | 1  |                       |               |
|   | 1  | 1285418254.0000000000 | 1.0000000000  |
| S | 1  |                       |               |
|   | 1  | 192485938.5000000000  | 1.0000000000  |
| S | 1  |                       |               |
|   | 1  | 28823953.9100000001   | 1.0000000000  |
| S | 1  |                       |               |
|   | 1  | 4316265.0000000000    | 1.0000000000  |
| S | 1  |                       |               |
|   | 1  | 646342.4000000000     | 1.0000000000  |
| S | 1  |                       |               |
|   | 1  | 147089.7000000000     | 1.0000000000  |
| S | 1  |                       |               |
|   | 1  | 41661.5200000000      | 1.0000000000  |
| S | 1  |                       |               |
|   | 1  | 13590.7700000000      | 1.0000000000  |
| S | 1  |                       |               |
|   | 1  | 4905.7500000000       | 1.0000000000  |
| S | 1  |                       |               |
|   | 1  | 1912.7460000000       | 1.0000000000  |
| S | 1  |                       |               |
|   | 1  | 792.6043000000        | 1.0000000000  |
| S | 1  |                       |               |
|   | 1  | 344.8065000000        | 1.0000000000  |
| S | 1  |                       |               |
|   | 1  | 155.8999000000        | 1.0000000000  |
| S | 1  |                       |               |
|   | 1  | 72.2309100000         | 1.0000000000  |
| S | 1  |                       |               |
|   | 1  | 32.7250600000         | 1.0000000000  |
| S | 1  |                       |               |
|   | 1  | 15.6676200000         | 1.0000000000  |
| S | 1  |                       |               |
|   | 1  | 7.5034830000          | 1.0000000000  |
| S | 1  |                       |               |
|   | 1  | 3.3122230000          | 1.0000000000  |
| S | 1  |                       |               |
|   | 1  | 1.5584710000          | 1.0000000000  |
| S | 1  |                       |               |
|   | 1  | 0.6839140000          | 1.0000000000  |
| S | 1  |                       |               |
|   | 1  | 0.1467570000          | 1.0000000000  |
| S | 1  |                       |               |
|   | 1  | 0.0705830000          | 1.0000000000  |
| S | 1  |                       |               |
|   | 1  | 0.0314490000          | 1.0000000000  |
| S | 1  |                       |               |
|   | 1  | 0.0140100000          | 1.0000000000  |
| P | 10 |                       |               |
|   | 1  | 74965.5865200000      | -0.0000030652 |
|   | 2  | 17745.6900000000      | -0.0000426385 |
|   | 3  | 4200.7210000000       | -0.0004353595 |
|   | 4  | 1364.4290000000       | -0.0023546474 |

|      |                  |               |
|------|------------------|---------------|
| 5    | 522.0806000000   | -0.0109370575 |
| 6    | 221.4595000000   | -0.0379266480 |
| 7    | 100.9096000000   | -0.1071129611 |
| 8    | 48.4011500000    | -0.2385782781 |
| 9    | 23.9853600000    | -0.3765275830 |
| 10   | 12.1825000000    | -0.3753260135 |
| P 10 |                  |               |
| 1    | 74965.5865200000 | -0.0000026059 |
| 2    | 17745.6900000000 | -0.0000381329 |
| 3    | 4200.7210000000  | -0.0003782391 |
| 4    | 1364.4290000000  | -0.0021042401 |
| 5    | 522.0806000000   | -0.0096040490 |
| 6    | 221.4595000000   | -0.0344433334 |
| 7    | 100.9096000000   | -0.0978912053 |
| 8    | 48.4011500000    | -0.2337788211 |
| 9    | 23.9853600000    | -0.3706145174 |
| 10   | 12.1825000000    | -0.3955462688 |
| P 1  |                  |               |
| 1    | 6.2422980000     | 1.0000000000  |
| P 1  |                  |               |
| 1    | 3.1109440000     | 1.0000000000  |
| P 1  |                  |               |
| 1    | 1.5099580000     | 1.0000000000  |
| P 1  |                  |               |
| 1    | 0.7108450000     | 1.0000000000  |
| P 1  |                  |               |
| 1    | 0.2731900000     | 1.0000000000  |
| P 1  |                  |               |
| 1    | 0.1042330000     | 1.0000000000  |
| P 1  |                  |               |
| 1    | 0.0382910000     | 1.0000000000  |
| P 1  |                  |               |
| 1    | 0.0140700000     | 1.0000000000  |
| D 4  |                  |               |
| 1    | 381.8765668000   | -0.0017960559 |
| 2    | 113.3440000000   | -0.0275628524 |
| 3    | 33.6414000000    | -0.2268797508 |
| 4    | 12.3310000000    | -0.8288676519 |
| D 1  |                  |               |
| 1    | 4.9947800000     | 1.0000000000  |
| D 1  |                  |               |
| 1    | 2.0728000000     | 1.0000000000  |
| D 1  |                  |               |
| 1    | 0.8307530000     | 1.0000000000  |
| D 1  |                  |               |
| 1    | 0.3091780000     | 1.0000000000  |
| D 1  |                  |               |
| 1    | 0.1001300000     | 1.0000000000  |
| D 1  |                  |               |
| 1    | 0.0324300000     | 1.0000000000  |
| F 1  |                  |               |
| 1    | 3.2758000000     | 1.0000000000  |
| F 1  |                  |               |
| 1    | 0.7920000000     | 1.0000000000  |
| F 1  |                  |               |
| 1    | 0.2749000000     | 1.0000000000  |
| G 1  |                  |               |
| 1    | 2.0897000000     | 1.0000000000  |
| G 1  |                  |               |
| 1    | 0.7871600000     | 1.0000000000  |
| end  |                  |               |

B. *s*-decontracted DKH-def2-TZVPP

NewGTO Fe

|   |                   |              |  |
|---|-------------------|--------------|--|
| S | 1                 |              |  |
| 1 | 300784.8463700000 | 1.0000000000 |  |
| S | 1                 |              |  |
| 1 | 45088.9705570000  | 1.0000000000 |  |
| S | 1                 |              |  |
| 1 | 10262.5163170000  | 1.0000000000 |  |
| S | 1                 |              |  |
| 1 | 2905.2897293000   | 1.0000000000 |  |
| S | 1                 |              |  |
| 1 | 946.1148713700    | 1.0000000000 |  |
| S | 1                 |              |  |
| 1 | 339.8783289400    | 1.0000000000 |  |
| S | 1                 |              |  |
| 1 | 131.9442558800    | 1.0000000000 |  |
| S | 1                 |              |  |
| 1 | 52.1114940800     | 1.0000000000 |  |
| S | 1                 |              |  |
| 1 | 329.4883926700    | 1.0000000000 |  |
| S | 1                 |              |  |
| 1 | 101.9233273900    | 1.0000000000 |  |
| S | 1                 |              |  |
| 1 | 16.2404627400     | 1.0000000000 |  |
| S | 1                 |              |  |
| 1 | 6.8840675800      | 1.0000000000 |  |
| S | 1                 |              |  |
| 1 | 10.4706937800     | 1.0000000000 |  |
| S | 1                 |              |  |
| 1 | 1.7360039600      | 1.0000000000 |  |
| S | 1                 |              |  |
| 1 | 0.7257728900      | 1.0000000000 |  |
| S | 1                 |              |  |
| 1 | 0.1159552800      | 1.0000000000 |  |
| S | 1                 |              |  |
| 1 | 0.0419682300      | 1.0000000000 |  |
| P | 6                 |              |  |
| 1 | 1585.3959970000   | 0.0034932434 |  |
| 2 | 375.3800649900    | 0.0239178708 |  |
| 3 | 120.3181650100    | 0.1064723133 |  |
| 4 | 44.7887490300     | 0.3000149937 |  |
| 5 | 17.8292785800     | 0.4790319948 |  |
| 6 | 7.2247153800      | 0.2711928303 |  |
| P | 1                 |              |  |
| 1 | 28.1432197600     | 1.0000000000 |  |
| P | 1                 |              |  |
| 1 | 3.8743241400      | 1.0000000000 |  |
| P | 1                 |              |  |
| 1 | 1.5410752300      | 1.0000000000 |  |
| P | 1                 |              |  |
| 1 | 0.5828561500      | 1.0000000000 |  |
| D | 4                 |              |  |
| 1 | 61.9966750300     | 0.0197602677 |  |
| 2 | 17.8737325500     | 0.1191944039 |  |
| 3 | 6.2744782900      | 0.3757301498 |  |
| 4 | 2.3552337200      | 0.6504527363 |  |
| D | 1                 |              |  |
| 1 | 0.8543224000      | 1.0000000000 |  |

|   |   |              |              |
|---|---|--------------|--------------|
| D | 1 |              |              |
|   | 1 | 0.2786925400 | 1.0000000000 |
| P | 1 |              |              |
|   | 1 | 0.2204000000 | 1.0000000000 |
| P | 1 |              |              |
|   | 1 | 0.0833800000 | 1.0000000000 |
| D | 1 |              |              |
|   | 1 | 0.0910000000 | 1.0000000000 |
| F | 1 |              |              |
|   | 1 | 3.4650000000 | 1.0000000000 |
| F | 1 |              |              |
|   | 1 | 0.8430000000 | 1.0000000000 |
| G | 1 |              |              |
|   | 1 | 2.1280000000 | 1.0000000000 |
|   |   | end          |              |

### C. *s*-decontracted x2c-TZVPPall

NewGTO Fe

|   |   |                   |              |
|---|---|-------------------|--------------|
| S | 1 |                   |              |
|   | 1 | 568671.5851900000 | 1.0000000000 |
| S | 1 |                   |              |
|   | 1 | 71381.6928490000  | 1.0000000000 |
| S | 1 |                   |              |
|   | 1 | 14484.2693160000  | 1.0000000000 |
| S | 1 |                   |              |
|   | 1 | 3781.8649758000   | 1.0000000000 |
| S | 1 |                   |              |
|   | 1 | 1159.5814022000   | 1.0000000000 |
| S | 1 |                   |              |
|   | 1 | 398.0167732600    | 1.0000000000 |
| S | 1 |                   |              |
|   | 1 | 147.9728740800    | 1.0000000000 |
| S | 1 |                   |              |
|   | 1 | 56.1872993440     | 1.0000000000 |
| S | 1 |                   |              |
|   | 1 | 348.2904042700    | 1.0000000000 |
| S | 1 |                   |              |
|   | 1 | 105.8462345400    | 1.0000000000 |
| S | 1 |                   |              |
|   | 1 | 16.8387194490     | 1.0000000000 |
| S | 1 |                   |              |
|   | 1 | 7.1130781143      | 1.0000000000 |
| S | 1 |                   |              |
|   | 1 | 10.7323618120     | 1.0000000000 |
| S | 1 |                   |              |
|   | 1 | 1.7765872891      | 1.0000000000 |
| S | 1 |                   |              |
|   | 1 | 0.7462990075      | 1.0000000000 |
| S | 1 |                   |              |
|   | 1 | 0.1195431489      | 1.0000000000 |
| S | 1 |                   |              |
|   | 1 | 0.0431448968      | 1.0000000000 |
| P | 6 |                   |              |
|   | 1 | 1913.6765901000   | 0.0027108020 |
|   | 2 | 421.5599419000    | 0.0206883282 |
|   | 3 | 130.4737972700    | 0.0979285981 |
|   | 4 | 47.5111355840     | 0.2895413458 |
|   | 5 | 18.5993994750     | 0.4814264752 |
|   | 6 | 7.4496187612      | 0.2916698170 |

|   |     |               |               |
|---|-----|---------------|---------------|
| P | 3   |               |               |
|   | 1   | 28.6053607740 | -0.0197461280 |
|   | 2   | 3.9427871862  | 0.3813687711  |
|   | 3   | 1.5699529988  | 0.6794911301  |
| P | 1   |               |               |
|   | 1   | 0.5929839866  | 1.0000000000  |
| D | 4   |               |               |
|   | 1   | 64.1204517710 | 0.0187699309  |
|   | 2   | 18.3894986480 | 0.1158182891  |
|   | 3   | 6.4193601128  | 0.3727830763  |
|   | 4   | 2.3965919355  | 0.6564490493  |
| D | 1   |               |               |
|   | 1   | 0.8637471259  | 1.0000000000  |
| D | 1   |               |               |
|   | 1   | 0.2795554046  | 1.0000000000  |
| P | 1   |               |               |
|   | 1   | 0.2204000000  | 1.0000000000  |
| P | 1   |               |               |
|   | 1   | 0.0833800000  | 1.0000000000  |
| D | 1   |               |               |
|   | 1   | 0.0910000000  | 1.0000000000  |
| F | 1   |               |               |
|   | 1   | 3.4650000000  | 1.0000000000  |
| F | 1   |               |               |
|   | 1   | 0.8430000000  | 1.0000000000  |
| G | 1   |               |               |
|   | 1   | 2.1280000000  | 1.0000000000  |
|   | end |               |               |

#### D. *s*-decontracted aug-cc-pVTZ-J(-*dfg*)

NewGTO Fe

|   |   |                       |              |
|---|---|-----------------------|--------------|
| S | 1 |                       |              |
|   | 1 | 8584004113.0000000000 | 1.0000000000 |
| S | 1 |                       |              |
|   | 1 | 1285418254.0000000000 | 1.0000000000 |
| S | 1 |                       |              |
|   | 1 | 192485938.5000000000  | 1.0000000000 |
| S | 1 |                       |              |
|   | 1 | 28823953.9100000001   | 1.0000000000 |
| S | 1 |                       |              |
|   | 1 | 4316265.0000000000    | 1.0000000000 |
| S | 1 |                       |              |
|   | 1 | 646342.4000000000     | 1.0000000000 |
| S | 1 |                       |              |
|   | 1 | 147089.7000000000     | 1.0000000000 |
| S | 1 |                       |              |
|   | 1 | 41661.5200000000      | 1.0000000000 |
| S | 1 |                       |              |
|   | 1 | 13590.7700000000      | 1.0000000000 |
| S | 1 |                       |              |
|   | 1 | 4905.7500000000       | 1.0000000000 |
| S | 1 |                       |              |
|   | 1 | 1912.7460000000       | 1.0000000000 |
| S | 1 |                       |              |
|   | 1 | 792.6043000000        | 1.0000000000 |
| S | 1 |                       |              |
|   | 1 | 344.8065000000        | 1.0000000000 |
| S | 1 |                       |              |
|   | 1 | 155.8999000000        | 1.0000000000 |



|    |                  |               |  |
|----|------------------|---------------|--|
| S  | 1                |               |  |
| 1  | 72.2309100000    | 1.0000000000  |  |
| S  | 1                |               |  |
| 1  | 32.7250600000    | 1.0000000000  |  |
| S  | 1                |               |  |
| 1  | 15.6676200000    | 1.0000000000  |  |
| S  | 1                |               |  |
| 1  | 7.5034830000     | 1.0000000000  |  |
| S  | 1                |               |  |
| 1  | 3.3122230000     | 1.0000000000  |  |
| S  | 1                |               |  |
| 1  | 1.5584710000     | 1.0000000000  |  |
| S  | 1                |               |  |
| 1  | 0.6839140000     | 1.0000000000  |  |
| S  | 1                |               |  |
| 1  | 0.1467570000     | 1.0000000000  |  |
| S  | 1                |               |  |
| 1  | 0.0705830000     | 1.0000000000  |  |
| S  | 1                |               |  |
| 1  | 0.0314490000     | 1.0000000000  |  |
| S  | 1                |               |  |
| 1  | 0.0140100000     | 1.0000000000  |  |
| P  | 10               |               |  |
| 1  | 74965.5865200000 | -0.0000030652 |  |
| 2  | 17745.6900000000 | -0.0000426385 |  |
| 3  | 4200.7210000000  | -0.0004353595 |  |
| 4  | 1364.4290000000  | -0.0023546474 |  |
| 5  | 522.0806000000   | -0.0109370575 |  |
| 6  | 221.4595000000   | -0.0379266480 |  |
| 7  | 100.9096000000   | -0.1071129611 |  |
| 8  | 48.4011500000    | -0.2385782781 |  |
| 9  | 23.9853600000    | -0.3765275830 |  |
| 10 | 12.1825000000    | -0.3753260135 |  |
| P  | 10               |               |  |
| 1  | 74965.5865200000 | -0.0000026059 |  |
| 2  | 17745.6900000000 | -0.0000381329 |  |
| 3  | 4200.7210000000  | -0.0003782391 |  |
| 4  | 1364.4290000000  | -0.0021042401 |  |
| 5  | 522.0806000000   | -0.0096040490 |  |
| 6  | 221.4595000000   | -0.0344433334 |  |
| 7  | 100.9096000000   | -0.0978912053 |  |
| 8  | 48.4011500000    | -0.2337788211 |  |
| 9  | 23.9853600000    | -0.3706145174 |  |
| 10 | 12.1825000000    | -0.3955462688 |  |
| P  | 1                |               |  |
| 1  | 6.2422980000     | 1.0000000000  |  |
| P  | 1                |               |  |
| 1  | 3.1109440000     | 1.0000000000  |  |
| P  | 1                |               |  |
| 1  | 1.5099580000     | 1.0000000000  |  |
| P  | 1                |               |  |
| 1  | 0.7108450000     | 1.0000000000  |  |
| P  | 1                |               |  |
| 1  | 0.2731900000     | 1.0000000000  |  |
| P  | 1                |               |  |
| 1  | 0.1042330000     | 1.0000000000  |  |
| P  | 1                |               |  |
| 1  | 0.0382910000     | 1.0000000000  |  |
| P  | 1                |               |  |
| 1  | 0.0140700000     | 1.0000000000  |  |
| D  | 4                |               |  |

|     |                |               |
|-----|----------------|---------------|
| 1   | 381.8765668000 | -0.0017960559 |
| 2   | 113.3440000000 | -0.0275628524 |
| 3   | 33.6414000000  | -0.2268797508 |
| 4   | 12.3310000000  | -0.8288676519 |
| D 1 |                |               |
| 1   | 4.9947800000   | 1.0000000000  |
| D 1 |                |               |
| 1   | 2.0728000000   | 1.0000000000  |
| D 1 |                |               |
| 1   | 0.8307530000   | 1.0000000000  |
| D 1 |                |               |
| 1   | 0.3091780000   | 1.0000000000  |
| D 1 |                |               |
| 1   | 0.1001300000   | 1.0000000000  |
| F 1 |                |               |
| 1   | 3.2758000000   | 1.0000000000  |
| F 1 |                |               |
| 1   | 0.7920000000   | 1.0000000000  |
| G 1 |                |               |
| 1   | 2.0897000000   | 1.0000000000  |
| end |                |               |

### E. aug-cc-pVTZ-Jmod

Proposed by Pantazis and co-workers for calculations of core properties.<sup>63</sup>

NewGTO Fe

|     |                     |              |
|-----|---------------------|--------------|
| S 1 |                     |              |
| 1   | 28823953.9100000001 | 1.0000000000 |
| S 1 |                     |              |
| 1   | 4316265.0000000000  | 1.0000000000 |
| S 1 |                     |              |
| 1   | 646342.4000000000   | 1.0000000000 |
| S 1 |                     |              |
| 1   | 147089.7000000000   | 1.0000000000 |
| S 1 |                     |              |
| 1   | 41661.5200000000    | 1.0000000000 |
| S 1 |                     |              |
| 1   | 13590.7700000000    | 1.0000000000 |
| S 1 |                     |              |
| 1   | 4905.7500000000     | 1.0000000000 |
| S 1 |                     |              |
| 1   | 1912.7460000000     | 1.0000000000 |
| S 1 |                     |              |
| 1   | 792.6043000000      | 1.0000000000 |
| S 1 |                     |              |
| 1   | 344.8065000000      | 1.0000000000 |
| S 1 |                     |              |
| 1   | 155.8999000000      | 1.0000000000 |
| S 1 |                     |              |
| 1   | 72.2309100000       | 1.0000000000 |
| S 1 |                     |              |
| 1   | 32.7250600000       | 1.0000000000 |
| S 1 |                     |              |
| 1   | 15.6676200000       | 1.0000000000 |
| S 1 |                     |              |
| 1   | 7.5034830000        | 1.0000000000 |
| S 1 |                     |              |
| 1   | 3.3122230000        | 1.0000000000 |

|    |                  |               |  |
|----|------------------|---------------|--|
| S  | 1                |               |  |
| 1  | 1.5584710000     | 1.0000000000  |  |
| S  | 1                |               |  |
| 1  | 0.6839140000     | 1.0000000000  |  |
| S  | 1                |               |  |
| 1  | 0.1467570000     | 1.0000000000  |  |
| S  | 1                |               |  |
| 1  | 0.0705830000     | 1.0000000000  |  |
| S  | 1                |               |  |
| 1  | 0.0314490000     | 1.0000000000  |  |
| S  | 1                |               |  |
| 1  | 0.0140100000     | 1.0000000000  |  |
| P  | 10               |               |  |
| 1  | 74965.5865200000 | -0.0000030652 |  |
| 2  | 17745.6900000000 | -0.0000426385 |  |
| 3  | 4200.7210000000  | -0.0004353595 |  |
| 4  | 1364.4290000000  | -0.0023546474 |  |
| 5  | 522.0806000000   | -0.0109370575 |  |
| 6  | 221.4595000000   | -0.0379266480 |  |
| 7  | 100.9096000000   | -0.1071129611 |  |
| 8  | 48.4011500000    | -0.2385782781 |  |
| 9  | 23.9853600000    | -0.3765275830 |  |
| 10 | 12.1825000000    | -0.3753260135 |  |
| P  | 10               |               |  |
| 1  | 74965.5865200000 | -0.0000026059 |  |
| 2  | 17745.6900000000 | -0.0000381329 |  |
| 3  | 4200.7210000000  | -0.0003782391 |  |
| 4  | 1364.4290000000  | -0.0021042401 |  |
| 5  | 522.0806000000   | -0.0096040490 |  |
| 6  | 221.4595000000   | -0.0344433334 |  |
| 7  | 100.9096000000   | -0.0978912053 |  |
| 8  | 48.4011500000    | -0.2337788211 |  |
| 9  | 23.9853600000    | -0.3706145174 |  |
| 10 | 12.1825000000    | -0.3955462688 |  |
| P  | 1                |               |  |
| 1  | 6.2422980000     | 1.0000000000  |  |
| P  | 1                |               |  |
| 1  | 3.1109440000     | 1.0000000000  |  |
| P  | 1                |               |  |
| 1  | 1.5099580000     | 1.0000000000  |  |
| P  | 1                |               |  |
| 1  | 0.7108450000     | 1.0000000000  |  |
| P  | 1                |               |  |
| 1  | 0.2731900000     | 1.0000000000  |  |
| P  | 1                |               |  |
| 1  | 0.1042330000     | 1.0000000000  |  |
| P  | 1                |               |  |
| 1  | 0.0382910000     | 1.0000000000  |  |
| P  | 1                |               |  |
| 1  | 0.0140700000     | 1.0000000000  |  |
| D  | 4                |               |  |
| 1  | 381.8765668000   | -0.0017960559 |  |
| 2  | 113.3440000000   | -0.0275628524 |  |
| 3  | 33.6414000000    | -0.2268797508 |  |
| 4  | 12.3310000000    | -0.8288676519 |  |
| D  | 1                |               |  |
| 1  | 4.9947800000     | 1.0000000000  |  |
| D  | 1                |               |  |
| 1  | 2.0728000000     | 1.0000000000  |  |
| D  | 1                |               |  |
| 1  | 0.8307530000     | 1.0000000000  |  |

|     |              |              |
|-----|--------------|--------------|
| D 1 |              |              |
| 1   | 0.3091780000 | 1.0000000000 |
| D 1 |              |              |
| 1   | 0.1001300000 | 1.0000000000 |
| D 1 |              |              |
| 1   | 0.0324300000 | 1.0000000000 |
| F 1 |              |              |
| 1   | 3.2758000000 | 1.0000000000 |
| F 1 |              |              |
| 1   | 0.7920000000 | 1.0000000000 |
| F 1 |              |              |
| 1   | 0.2749000000 | 1.0000000000 |
| G 1 |              |              |
| 1   | 2.0897000000 | 1.0000000000 |
| G 1 |              |              |
| 1   | 0.7871600000 | 1.0000000000 |
| end |              |              |

## References

1. R. Greatrex and N. Greenwood, Mössbauer spectra, structure, and bonding in iron carbonyl derivatives, *Discuss. Faraday Soc.*, 1969, **47**, 126-135.
2. W. Kerler, W. Neuwirth and E. Fluck, Isomerieverschiebung und Quadrupolaufspaltung beim Mößbauer-Effekt von Fe<sup>57</sup> in Eisenverbindungen, *Z. Phys.*, 1963, **175**, 200-220.
3. Y. Yamada and T. Tominaga, Molecular orbital calculation of Mössbauer parameters for iron carbonyl compounds isolated in low temperature matrices, *Radiochim. Acta*, 1998, **80**, 163-170.
4. S. Kukulich, M. Roehrig, D. Wallace and G. Henderson, Microwave measurements of the rotational spectrum and structure of butadieneiron tricarbonyl, *J. Am. Chem. Soc.*, 1993, **115**, 2021-2027.
5. E. I. Solomon and A. B. P. Lever, *Inorganic electronic structure and spectroscopy*, Wiley, New York, 1999.
6. S. F. McWilliams, E. Brennan-Wydra, K. C. MacLeod and P. L. Holland, Density Functional Calculations for Prediction of <sup>57</sup>Fe Mössbauer Isomer Shifts and Quadrupole Splittings in  $\beta$ -Diketimate Complexes, *ACS Omega*, 2017, **2**, 2594-2606.
7. E. Koenig and K. Madeja, 5T2-1A1 Equilibriums in some iron (II)-bis (1, 10-phenanthroline) complexes, *Inorg. Chem.*, 1967, **6**, 48-55.
8. I. Dézsi, B. Molnar, T. Tarnoczi and K. Tompa, On the magnetic behaviour of iron (II)-bis-(1, 10 phenantroline)-thiocyanate between- 190° and 30° C, *J. Inorg. Nucl. Chem.*, 1967, **29**, 2486-2490.
9. N. Bréfuel, I. Vang, S. Shova, F. Dahan, J.-P. Costes and J.-P. Tuchagues, FeII Spin crossover materials based on dissymmetrical N4 Schiff bases including 2-pyridyl and 2R-imidazol-4-yl rings: Synthesis, crystal structure and magnetic and Mössbauer properties, *Polyhedron*, 2007, **26**, 1745-1757.
10. E. Fluck, in *Chemical Applications of Mössbauer Spectroscopy*, eds. V. I. Goldanskii and R. H. Herber, Academic Press, Inc.: New York, 1968, pp. 268– 311.
11. M. Li, D. Bonnet, E. Bill, F. Neese, T. Weyhermüller, N. Blum, D. Sellmann and K. Wieghardt, Tuning the Electronic Structure of Octahedral Iron Complexes [FeL (X)](L= 1-Alkyl-4, 7-bis (4-tert-butyl-2-mercaptobenzyl)-1, 4, 7-triazacyclononane, X= Cl, CH<sub>3</sub>O, CN, NO). The S= 1/2 $\rightleftharpoons$  S= 3/2 Spin Equilibrium of [FeLPr (NO)], *Inorg. Chem.*, 2002, **41**, 3444-3456.
12. R. H. Havlin, N. Godbout, R. Salzman, M. Wojdelski, W. Arnold, C. E. Schulz and E. Oldfield, An experimental and density functional theoretical investigation of iron-57 Mössbauer quadrupole splittings in organometallic and heme-model compounds: applications to carbonmonoxy-heme protein structure, *J. Am. Chem. Soc.*, 1998, **120**, 3144-3151.
13. N. J. Silvernail, B. C. Noll, C. E. Schulz and W. R. Scheidt, Coordination of diatomic ligands to heme: Simply CO, *Inorg. Chem.*, 2006, **45**, 7050-7052.
14. B. V. Obrist, D. Chen, A. Ahrens, V. Schünemann, R. Scopelliti and X. Hu, An iron carbonyl pyridonate complex related to the active site of the [Fe]-hydrogenase (Hmd), *Inorg. Chem.*, 2009, **48**, 3514-3516.
15. D. Chen, A. Ahrens-Botzong, V. Schünemann, R. Scopelliti and X. Hu, Synthesis and characterization of a series of model complexes of the active site of [Fe]-hydrogenase (Hmd), *Inorg. Chem.*, 2011, **50**, 5249-5257.
16. P. E. Gütllich, J, in *Inorganic electronic structure and spectroscopy*, ed. A. B. P. S. Lever, E. I., John Wiley and Sons: New York, 1999, vol. 1, pp. 161– 212.
17. M. Garcia Posse, M. Juri, P. Aymonino, O. Piro, H. Negri and E. Castellano, Additions and Corrections- Synthesis, Crystal and Molecular Structure, and Spectroscopic Properties of Tris (2, 2'-bipyridyl) iron (II) Nitroprusside Tetrahydrate [Fe(bpy)<sub>3</sub>][Fe(CN)<sub>5</sub>NO]·4H<sub>2</sub>O, *Inorg. Chem.*, 1984, **23**, 1788-1788.
18. W. M. Reiff, E. H. Witten, K. Mottle, T. F. Brennan and A. R. Garafalo, The ferric chloride  $\alpha$ -di-imine system. Part V. X-ray structure determination of tris(1,10-phenanthroline)iron(II) $\mu$ -oxo-bis(trichloroiron(III))-DMF, *Inorg. Chim. Acta*, 1983, **77**, L83-L88.

19. D. L. Reger, C. A. Little, M. D. Smith, A. L. Rheingold, K. C. Lam, T. L. Concolino, G. J. Long, R. P. Hermann and F. Grandjean, Synthetic, structural, magnetic, and Mössbauer spectral study of  $\{\text{Fe}[\text{HC}(3,5\text{-Me}_2\text{pz})_3]_2\}_2$  and its spin-state crossover behavior, *Eur. J. Inorg. Chem.*, 2002, **2002**, 1190-1197.
20. R. A. Stukan, S. P. Gubin, A. N. Nesmeyanov, V. I. Gol'danskii and E. F. Makarov, A Mössbauer study of some ferrocene derivatives, *Theor. Exp. Chem.*, 1966, **2**, 581-584.
21. M. Hanack, U. Keppeler, A. Lange, A. Hirsch and R. Dieing, in *Phthalocyanines: Properties and Applications*, eds. A. B. P. Lever and C. C. Leznoff, Wiley-VCH: New York, 1993, vol. 2, p. 43-96.
22. M. Keilwerth, W. Mao, S. A. V. Jannuzzi, L. Grunwald, F. W. Heinemann, A. Scheurer, J. Sutter, S. DeBeer, D. Munz and K. Meyer, From Divalent to Pentavalent Iron Imido Complexes and an Fe(V) Nitride via N-C Bond Cleavage, *J. Am. Chem. Soc.*, 2023, **145**, 873-887.
23. H. Schottenberger, M. R. Buchmeiser and R. H. Herber,  $^{57}\text{Fe}$ -Mössbauer spectroscopic study of monomeric and polymeric ferrocenyl- and octamethylferrocenyl-substituted ethynes, *J. Organomet. Chem.*, 2000, **612**, 1-8.
24. S. H. Strauss, M. E. Silver, K. M. Long, R. G. Thompson, R. A. Hudgens, K. Spartalian and J. A. Ibers, Comparison of the molecular and electronic structures of (2,3,7,8,12,13,17,18-octaethylporphyrinato)iron(II) and (trans-7,8-dihydro-2,3,7,8,12,13,17,18-octaethylporphyrinato)iron(II), *J. Am. Chem. Soc.*, 1985, **107**, 4207-4215.
25. J. P. Collman, J. L. Hoard, N. Kim, G. Lang and C. A. Reed, Synthesis, stereochemistry, and structure-related properties of .alpha.,.beta.,.gamma.,.delta.-tetraphenylporphyrinatoiron(II), *J. Am. Chem. Soc.*, 1975, **97**, 2676-2681.
26. N. Li, Z. Su, P. Coppens and J. Landrum, X-ray diffraction study of the electronic ground state of (meso-tetraphenylporphyrinato)iron(II), *J. Am. Chem. Soc.*, 1990, **112**, 7294-7298.
27. Y. Huang, M.-E. Moret, R. J. M. Klein Gebbink and M. Lutz, Crystallographic Space Group Choice and Its Chemical Consequences: Revised Crystal Structure of  $[\text{Fe}(\text{phen})_2\text{Cl}_2]\text{NO}_3$ , *Eur. J. Inorg. Chem.*, 2013, **2013**, 2467-2469.
28. D. Coucouvanis, D. Swenson, N. Baenziger, C. Murphy, D. Holah, N. Sfarnas, A. Simopoulos and A. Kostikas, Tetrahedral complexes containing the Fe (II) S4 core. The syntheses, ground-state electronic structures and crystal and molecular structures of the bis (tetraphenylphosphonium) tetrakis (thiophenolato) ferrate (II) and bis (tetraphenylphosphonium) bis (dithiosquarato) ferrate (II) complexes. An analog for the active site in reduced rubredoxins (Rdred), *J. Am. Chem. Soc.*, 1981, **103**, 3350-3362.
29. P. R. Edwards, C. E. Johnson and R. J. P. Williams, Mössbauer Spectra of Some Tetrahedral Iron (II) Compounds, *J. Chem. Phys.*, 2004, **47**, 2074-2082.
30. Y. Sanakis, P. P. Power, A. Stubna and E. Münck, Mössbauer Study of the Three-Coordinate Planar FeII Thiolate Complex  $[\text{Fe}(\text{SR})_3]\text{-(R=C}_6\text{H}_2\text{-2, 4, 6-tBu}_3\text{)}$ : Model for the Trigonal Iron Sites of the MoFe7S9: Homocitrate Cofactor of Nitrogenase, *Inorg. Chem.*, 2002, **41**, 2690-2696.
31. F. M. MacDonnell, K. Ruhlandt-Senge, J. J. Ellison, R. Holm and P. P. Power, Sterically encumbered iron (II) thiolate complexes: synthesis and structure of trigonal planar  $[\text{Fe}(\text{SR})_3]\text{-(R= 2, 4, 6-t-Bu}_3\text{C}_6\text{H}_2)$  and Mössbauer spectra of two- and three-coordinate complexes, *Inorg. Chem.*, 1995, **34**, 1815-1822.
32. E. L. Bominaar, X. Q. Ding, A. Gismelseed, E. Bill, H. Winkler, A. X. Trautwein, H. Nasri, J. Fischer and R. Weiss, Structural, Moessbauer, and EPR investigations on two oxidation states of a five-coordinate, high-spin synthetic heme. Quantitative interpretation of zero-field parameters and large quadrupole splitting, *Inorg. Chem.*, 1992, **31**, 1845-1854.
33. K. C. MacLeod, S. F. McWilliams, B. Q. Mercado and P. L. Holland, Stepwise N-H bond formation from N<sub>2</sub>-derived iron nitride, imide and amide intermediates to ammonia, *Chem. Sci.*, 2016, **7**, 5736-5746.
34. M. Garcia Posse, M. Juri, P. Aymonino, O. Piro, H. Negri and E. Castellano, Additions and Corrections- Synthesis, Crystal and Molecular Structure, and Spectroscopic Properties of Tris (2, 2'-bipyridyl) iron (II) Nitroprusside Tetrahydrate  $[\text{Fe}(\text{bpy})_3][\text{Fe}(\text{CN})_5\text{NO}]\cdot 4\text{H}_2\text{O}$ , *Inorg. Chem.*, 1984, **23**, 1788-1788.
35. L. A. Barrios, C. Bartual-Murgui, E. Peyrecave-Lleixà, B. Le Guennic, S. J. Teat, O. Roubeau and G. Aromí, Homoleptic versus Heteroleptic Formation of Mononuclear Fe(II) Complexes with Tris-Imine Ligands, *Inorg. Chem.*, 2016, **55**, 4110-4116.

36. H. Oshio, H. Spiering, V. Ksenofontov, F. Renz and P. Gülich, Electronic Relaxation Phenomena Following  $^{57}\text{Co}(\text{EC})^{57}\text{Fe}$  Nuclear Decay in  $[\text{MnII}(\text{terpy})_2](\text{ClO}_4)_2 \cdot 1/2\text{H}_2\text{O}$  and in the Spin Crossover Complexes  $[\text{CoII}(\text{terpy})_2]\text{X}_2 \cdot n\text{H}_2\text{O}$  ( $\text{X} = \text{Cl}$  and  $\text{ClO}_4$ ): A Mössbauer Emission Spectroscopic Study, *Inorg. Chem.*, 2001, **40**, 1143-1150.
37. K. Meyer, E. Bill, B. Mienert, T. Weyhermüller and K. Wieghardt, Photolysis of cis- and trans- $[\text{FeIII}(\text{cyclam})(\text{N}_3)_2]^+$  Complexes: Spectroscopic Characterization of a Nitridoiron(V) Species, *J. Am. Chem. Soc.*, 1999, **121**, 4859-4876.
38. M. K. Safo, G. P. Gupta, F. A. Walker and W. R. Scheidt, Models of the cytochromes b. Control of axial ligand orientation with a hindered porphyrin system, *J. Am. Chem. Soc.*, 1991, **113**, 5497-5510.
39. Y. Maeda, H. Oshio, Y. Takashima, M. Mikuriya and M. Hidaka, Crystal structure, Moessbauer spectra, and magnetic properties of bis  $[\text{N}-(1\text{-acetyl-2-propylidene})(2\text{-pyridylmethyl})\text{aminato}]$  iron (1+) hexafluorophosphate and crystallographic changes in fast electronic relaxation between  $S= 1/2$  and  $S= 5/2$ , *Inorg. Chem.*, 1986, **25**, 2958-2962.
40. S. Hayami, K. Hashiguchi, K. Inoue and Y. Maeda, Photo-induced spin transition for an iron (III) pyruvic acid thiosemicarbazone compound, *J. Nucl. Radiochem. Sci.*, 2004, **5**, N1-N3.
41. M. Malischewski, K. Seppelt, J. Sutter, D. Munz and K. Meyer, A Ferrocene-Based Dicationic Iron(IV) Carbonyl Complex, *Angew. Chem., Int. Ed.*, 2018, **57**, 14597-14601.
42. M. Fettouhi, M. Morsy, A. Waheed, S. Golhen, L. Ouahab, J.-P. Sutter, O. Kahn, N. Menendez and F. Varret, Spin-Crossover in the Complex Bis (cis-1, 2-dicyano-1, 2-ethylenedithiolato)[2-(p-pyridyl)-4, 4, 5, 5-tetramethylimidazolium] iron (III), *Inorg. Chem.*, 1999, **38**, 4910-4912.
43. K. L. Kostka, B. G. Fox, M. P. Hendrich, T. J. Collins, C. E. Rickard, L. J. Wright and E. Munck, High-valent transition metal chemistry. Moessbauer and EPR studies of high-spin ( $S= 2$ ) iron (IV) and intermediate-spin ( $S= 3/2$ ) iron (III) complexes with a macrocyclic tetraamido-N ligand, *J. Am. Chem. Soc.*, 1993, **115**, 6746-6757.
44. T. C. Harrop, D. Song and S. J. Lippard, Interaction of nitric oxide with tetrathiolato iron (II) complexes: relevance to the reaction pathways of iron nitrosyls in sulfur-rich biological coordination environments, *J. Am. Chem. Soc.*, 2006, **128**, 3528-3529.
45. L. E. Maelia, M. Millar and S. A. Koch, General synthesis of iron (III) tetrathiolate complexes. Structural and spectroscopic models for the  $[\text{Fe}(\text{Cys-S})_4]$  center in oxidized rubredoxin, *Inorg. Chem.*, 1992, **31**, 4594-4600.
46. T. C. Harrop, Z. J. Tonzetich, E. Reisner and S. J. Lippard, Reactions of synthetic  $[\text{2Fe-2S}]$  and  $[\text{4Fe-4S}]$  clusters with nitric oxide and nitrosothiols, *J. Am. Chem. Soc.*, 2008, **130**, 15602-15610.
47. Y. Ohgo, S. Neya, T. Ikeue, N. Funasaki and M. Nakamura, Chloro(3,6,13,16-tetraethyl-2,7,12,17-tetramethylporphycenato-[kappa]4N)iron(III) chloroform solvate, *Acta Crystallogr. C*, 2001, **57**, 1046-1047.
48. E. L. Bominaar, X. Q. Ding, A. Gismelseed, E. Bill, H. Winkler, A. X. Trautwein, H. Nasri, J. Fischer and R. Weiss, Structural, Mössbauer, and EPR investigations on two oxidation states of a five-coordinate, high-spin synthetic heme. Quantitative interpretation of zero-field parameters and large quadrupole splitting, *Inorg. Chem.*, 1992, **31**, 1845-1854.
49. V. Varnek, I. Igumenov, P. Stabnikov and L. Mazalov, Parameters and Form of the Mössbauer Spectra of Iron (III)  $\beta$ -Diketonates: New Data, *J. Struct. Chem.*, 2000, **41**, 977-988.
50. M. M. Rodriguez, E. Bill, W. W. Brennessel and P. L. Holland,  $\text{N}_2$  reduction and hydrogenation to ammonia by a molecular iron-potassium complex, *Science*, 2011, **334**, 780-783.
51. C. Souilah, S. A. V. Jannuzzi, D. Demirbas, S. Ivlev, M. Swart, S. DeBeer and A. Casitas, Synthesis of FeIII and FeIV Cyanide Complexes Using Hypervalent Iodine Reagents as Cyano-Transfer One-Electron Oxidants, *Angew. Chem., Int. Ed.*, 2022, **61**, e202201699.
52. D. Sellmann, M. Geck, F. Knoch, G. Ritter and J. Dengler, Transition-metal complexes with sulfur ligands. 57. Stabilization of high-valent iron (IV) centers and vacant coordination sites by sulfur. pi-donation: syntheses, x-ray structures, and properties of  $[\text{Fe}(\text{S}_2)(\text{PMe}_3)_n](n= 1, 2)$  and  $(\text{NMe}_4)[\text{Fe}$

- (" S2") 2 (PMe3) 2]. cntdot. CH3OH (" S2" 2= 1, 2-benzenedithiolate (2-)), *J. Am. Chem. Soc.*, 1991, **113**, 3819-3828.
53. E. J. Klinker, J. Kaizer, W. W. Brennessel, N. L. Woodrum, C. J. Cramer and L. Que Jr., Structures of Nonheme Oxoiron(IV) Complexes from X-ray Crystallography, NMR Spectroscopy, and DFT Calculations, *Angew. Chem., Int. Ed.*, 2005, **44**, 3690-3694.
  54. J.-U. Rohde, J.-H. In, M. H. Lim, W. W. Brennessel, M. R. Bukowski, A. Stubna, E. Münck, W. Nam and L. Que, Crystallographic and Spectroscopic Characterization of a Nonheme Fe(IV)=O Complex, *Science*, 2003, **299**, 1037-1039.
  55. D. Mandon, R. Weiss, K. Jayaraj, A. Gold, J. Ternner, E. Bill and A. Trautwein, Models for peroxidase compound I: generation and spectroscopic characterization of new oxoferryl porphyrin. pi. cation radical species, *Inorg. Chem.*, 1992, **31**, 4404-4409.
  56. T. J. Collins, K. L. Kostka, E. Munck and E. S. Uffelman, Stabilization of mononuclear five-coordinate iron(IV), *J. Am. Chem. Soc.*, 1990, **112**, 5637-5639.
  57. F. T. De Oliveira, A. Chanda, D. Banerjee, X. Shan, S. Mondal, L. Que Jr, E. L. Bominaar, E. Münck and T. J. Collins, Chemical and spectroscopic evidence for an Fe<sup>V</sup>-oxo complex, *Science*, 2007, **315**, 835-838.
  58. C. A. Grapperhaus, B. Mienert, E. Bill, T. Weyhermüller and K. Wieghardt, Mononuclear (Nitrido)iron(V) and (Oxo)iron(IV) Complexes via Photolysis of [(cyclam-acetato)Fe<sup>III</sup>(N3)]<sup>+</sup> and Ozonolysis of [(cyclam-acetato)Fe<sup>III</sup>(O<sub>3</sub>SCF<sub>3</sub>)]<sup>+</sup> in Water/Acetone Mixtures, *Inorg. Chem.*, 2000, **39**, 5306-5317.
  59. J. F. Berry, E. Bill, E. Bothe, T. Weyhermüller and K. Wieghardt, Octahedral Non-Heme Non-Oxo Fe(IV) Species Stabilized by a Redox-Innocent N-Methylated Cyclam-Acetate Ligand, *J. Am. Chem. Soc.*, 2005, **127**, 11550-11551.
  60. M. Keilwerth, W. Mao, M. Malischewski, S. A. V. Jannuzzi, K. Breitwieser, F. W. Heinemann, A. Scheurer, S. DeBeer, D. Munz, E. Bill and K. Meyer, The synthesis and characterization of an iron(VII) nitrido complex, *Nat. Chem.*, 2024, **16**, 514-520.
  61. V. N. Nemykin, D. E. Nevenon, L. S. Ferch, M. Shepit, D. E. Herbert and J. van Lierop, Accurate Prediction of Mössbauer Hyperfine Parameters in Bis-Axially Coordinated Iron(II) Phthalocyanines Using Density Functional Theory Calculations: A Story of a Single Orbital Revealed by Natural Bond Orbital Analysis, *Inorg. Chem.*, 2021, **60**, 3690-3706.
  62. D. L. Reger, C. A. Little, M. D. Smith, A. L. Rheingold, K. C. Lam, T. L. Concolino, G. J. Long, R. P. Hermann and F. Grandjean, Synthetic, structural, magnetic, and Mössbauer spectral study of {Fe [HC (3, 5-Me<sub>2</sub>pz) 3] 2} I<sub>2</sub> and its spin-state crossover behavior, *Eur. J. Inorg. Chem.*, 2002, **2002**, 1190-1197.
  63. R. J. Gómez-Piñeiro, D. A. Pantazis and M. Orio, Comparison of Density Functional and Correlated Wave Function Methods for the Prediction of Cu(II) Hyperfine Coupling Constants, *ChemPhysChem*, 2020, **21**, 2667-2679.
  64. J. Ladrière, A. Meykens, R. Coussement, M. Cogneau, M. Boge, P. Auric, R. Bouchez, A. Benabed and J. Godard, Isomer shift calibration of <sup>57</sup>Fe by life-time variations in the electron-capture decay of <sup>52</sup>Fe, *J. Phys. Colloques*, 1979, **40**, C2-20-C22-22.
  65. T. Liu, T. Lovell, W.-G. Han and L. Noodleman, DFT Calculations of Isomer Shifts and Quadrupole Splitting Parameters in Synthetic Iron-Oxo Complexes: Applications to Methane Monooxygenase and Ribonucleotide Reductase, *Inorg. Chem.*, 2003, **42**, 5244-5251.
  66. W.-G. Han, T. Liu, T. Lovell and L. Noodleman, DFT calculations of <sup>57</sup>Fe Mössbauer isomer shifts and quadrupole splittings for iron complexes in polar dielectric media: Applications to methane monooxygenase and ribonucleotide reductase, *J. Comput. Chem.*, 2006, **27**, 1292-1306.
  67. W.-G. Han and L. Noodleman, Structural model studies for the high-valent intermediate Q of methane monooxygenase from broken-symmetry density functional calculations, *Inorg. Chim. Acta*, 2008, **361**, 973-986.
  68. K. H. Hopmann, A. Ghosh and L. Noodleman, Density Functional Theory Calculations on Mössbauer Parameters of Nonheme Iron Nitrosyls, *Inorg. Chem.*, 2009, **48**, 9155-9165.
